# Supplementary material for: ChIP-Seq and RNA-Seq Reveal an AmrZ-Mediated Mechanism for Cyclic di-GMP Synthesis and Biofilm Development by Pseudomonas aeruginosa
Source: PLoS Pathog. 2014 Mar 6;10(3):e1003984. doi: 10.1371/journal.ppat.1003984 (PMC3946381; doi:10.1371/journal.ppat.1003984)
Supplement: Table S2 — RNA-Seq data. List of all genes whose expression is significantly different comparing the complemented AmrZ strain to the ΔamrZ mutant. Negative fold change indicates that the expression was lower in the complemented strain than the mutant (repressed by AmrZ), while positive fold change indicates that the expression was higher in the complemented strain than the mutant (activated by AmrZ). (XLSX) [file ppat.1003984.s005.xlsx]

## Sheet: RNA-seq data
Table S2. RNA-Seq data. List of all genes whose expression is significantly different comparing the complemented AmrZ strain to the ΔamrZ mutant. Negative fold change indicates that the expression was lower in the complemented strain than the mutant (repressed by AmrZ), while positive fold change indicates that the expression was higher in the complemented strain than the mutant (activated by Amr…
SYMBOL	LOCUS	PRODUCT	Fold Change	START	STOP	STRAND
amrZ	PA3385	alginate and motility regulator Z	483.31	3791347	3791673	+
PA2145	PA2145	hypothetical protein	30.14	2360809	2361207	-
PA1784	PA1784	hypothetical protein	19.74	1932129	1932824	-
PA0052	PA0052	hypothetical protein	8.29	68188	68616	-
PA1845	PA1845	hypothetical protein	8.26	2004374	2004892	-
PA2146	PA2146	hypothetical protein	8.26	2361706	2361873	+
ppc	PA3687	phosphoenolpyruvate carboxylase	7.96	4127756	4130392	-
endA	PA2749	DNA-specific endonuclease I	7.28	3110901	3111614	+
PA2928	PA2928	hypothetical protein	7.06	3283375	3284598	-
pelB	PA3063	protein PelB	6.64	3427486	3431067	-
pelC	PA3062	protein PelC	6.13	3426928	3427446	-
PA2750	PA2750	hypothetical protein	5.15	3111633	3112151	+
minC	PA3243	septum formation inhibitor	4.92	3630765	3631556	+
pelA	PA3064	PelA protein	4.86	3431045	3433891	-
PA1068	PA1068	heat shock protein (hsp90 family)	4.77	1153637	1155547	+
PA0102	PA0102	carbonic anhydrase	4.57	123871	124599	+
PA0050	PA0050	hypothetical protein	4.49	65339	65479	+
PA0073	PA0073	ABC transporter ATP-binding protein	4.44	86284	87003	-
ohr	PA2850	organic hydroperoxide resistance protein	4.38	3203998	3204426	+
PA0103	PA0103	sulfate transporter	4.04	124810	126381	+
PA0078	PA0078	hypothetical protein	4.03	95048	96397	-
PA0072	PA0072	hypothetical protein	3.93	85085	86284	-
PA2939	PA2939	aminopeptidase	3.93	3294282	3295892	+
hcp1	PA0085	hypothetical protein	3.88	103350	103838	+
pelD	PA3061	protein PelD	3.87	3425555	3426922	-
fha1	PA0081	Fha1	3.85	98263	99756	-
algD	PA3540	GDP-mannose 6-dehydrogenase AlgD	3.79	3962825	3964135	+
pelE	PA3060	protein PelE	3.74	3424588	3425577	-
pppA	PA0075	PppA	3.72	90106	90834	-
PA0089	PA0089	hypothetical protein	3.72	107182	108228	+
PA0076	PA0076	hypothetical protein	3.71	90844	91524	-
PA2927	PA2927	hypothetical protein	3.67	3281988	3283319	+
ppkA	PA0074	serine/threonine protein kinase PpkA	3.61	87000	90098	-
icmF1	PA0077	IcmF1	3.53	91521	94826	-
PA0088	PA0088	hypothetical protein	3.47	105359	107218	+
PA4423	PA4423	hypothetical protein	3.41	4957709	4959523	+
PA0083	PA0083	hypothetical protein	3.35	101247	101765	+
PA0084	PA0084	hypothetical protein	3.28	101778	103274	+
PA1069	PA1069	hypothetical protein	3.22	1155584	1157878	+
vgrG1	PA0091	VgrG1	3.2	110976	112907	+
PA0079	PA0079	hypothetical protein	3.16	96404	97738	-
PA2655	PA2655	hypothetical protein	3.14	3005606	3005914	-
PA4638	PA4638	hypothetical protein	3.13	5206720	5207007	-
clpV1	PA0090	ClpV1 protein	3.09	108221	110929	+
PA0086	PA0086	hypothetical protein	2.98	104006	104851	+
PA5182	PA5182	hypothetical protein	2.89	5835482	5835895	+
PA3053	PA3053	hydrolytic enzyme	2.87	3417113	3418120	+
PA0082	PA0082	hypothetical protein	2.84	100124	101158	+
PA4625	PA4625	hypothetical protein	2.84	5186411	5192875	-
vreA	PA0674	VreA	2.67	734159	734875	+
PA0087	PA0087	hypothetical protein	2.62	104853	105362	+
PA3424	PA3424	hypothetical protein	2.62	3833774	3835180	+
Leu_tRNA	PA4937.2	Leu tRNA	2.62	5541830	5541916	+
PA4624	PA4624	hypothetical protein	2.54	5184642	5186348	-
PA0080	PA0080	hypothetical protein	2.53	97754	98218	-
PA3519	PA3519	hypothetical protein	2.52	3935800	3936837	-
PA1844	PA1844	hypothetical protein	2.49	2003868	2004332	-
PA2819	PA2819	hypothetical protein	2.48	3173244	3173723	+
PA4424	PA4424	hypothetical protein	2.48	4959520	4959897	+
Gly_tRNA	PA2819.1	Gly tRNA	2.38	3173599	3173674	-
pelF	PA3059	protein PelF	2.38	3423068	3424591	-
pqsA	PA0996	coenzyme A ligase	2.37	1078462	1080015	+
napB	PA1173	cytochrome C protein NapB	2.36	1272807	1273298	-
pqsB	PA0997	PqsB	2.31	1080009	1080860	+
minD	PA3244	cell division inhibitor MinD	2.31	3631618	3632433	+
phnA	PA1001	anthranilate synthase component I	2.3	1083972	1085564	+
vreR	PA0676	sigma factor regulator, VreR	2.29	735487	736446	+
pqsE	PA1000	Quinolone signal response protein	2.29	1082949	1083854	+
pqsC	PA0998	PqsC	2.25	1080853	1081899	+
PA1891	PA1891	hypothetical protein	2.25	2061278	2061667	-
pqsD	PA0999	3-oxoacyl-ACP synthase	2.24	1081942	1082955	+
aroB	PA5038	3-dehydroquinate synthase	2.23	5674028	5675134	-
katE	PA2147	hydroperoxidase II	2.22	2361954	2364083	+
PA5460	PA5460	hypothetical protein	2.19	6151314	6151526	+
PA5471.1	PA5471.1	leader peptide	2.19	6160912	6160953	-
minE	PA3245	cell division topological specificity factor MinE	2.16	3632430	3632684	+
PA2684	PA2684	hypothetical protein	2.14	3031749	3035702	-
xcpU	PA3100	general secretion pathway outer membrane protein H precursor	2.14	3479721	3480239	-
Gly_tRNA	PA2819.2	Gly tRNA	2.12	3173759	3173834	-
napF	PA1176	ferredoxin protein NapF	2.08	1276117	1276608	-
Leu_tRNA	PA4937.1	Leu tRNA	2.07	5541614	5541700	+
xcpW	PA3098	general secretion pathway protein J	2.06	3478625	3479338	-
PA1831	PA1831	hypothetical protein	2.04	1989484	1990194	-
PA2933	PA2933	major facilitator superfamily (MFS) transporter	2.03	3288515	3289693	+
PA4828	PA4828	hypothetical protein	2.03	5419863	5420318	+
napD	PA1175	NapD protein of periplasmic nitrate reductase	2.02	1275795	1276124	-
PA4112	PA4112	sensor/response regulator hybrid	2.01	4595849	4600102	-
PA5174	PA5174	beta-ketoacyl synthase	1.97	5826135	5828039	+
PA2314	PA2314	major facilitator superfamily (MFS) transporter	1.96	2551422	2552675	-
PA2869	PA2869	hypothetical protein	1.96	3221652	3222140	+
mreB	PA4481	rod shape-determining protein MreB	1.96	5012394	5013431	-
PA0909	PA0909	hypothetical protein	1.95	993776	994051	+
xcpV	PA3099	general secretion pathway protein I	1.94	3479335	3479724	-
rpsT	PA4563	30S ribosomal protein S20	1.94	5112663	5112938	+
gcdH	PA0447	glutaryl-CoA dehydrogenase	1.93	502719	503900	-
xcpX	PA3097	general secretion pathway protein K	1.93	3477627	3478628	-
PA1575	PA1575	hypothetical protein	1.92	1715154	1715705	-
pyrD	PA3050	dihydroorotate dehydrogenase	1.92	3414701	3415729	-
PA4425	PA4425	phosphoheptose isomerase	1.92	4959926	4960519	+
PA0101	PA0101	hypothetical protein	1.91	122248	123495	+
napE	PA1177	periplasmic nitrate reductase protein NapE	1.91	1276617	1276784	-
PA2685	PA2685	hypothetical protein	1.91	3035752	3037932	-
mvfR	PA1003	transcriptional regulator MvfR	1.9	1086097	1087095	-
PA2369	PA2369	hypothetical protein	1.89	2617938	2619731	+
algF	PA3550	alginate o-acetyltransferase AlgF	1.89	3977184	3977834	+
PA0911	PA0911	hypothetical protein	1.87	994699	995151	+
Ala_tRNA	PA3133.4	Ala tRNA	1.87	3515138	3515213	-
PA0632	PA0632	hypothetical protein	1.86	689236	689466	+
PA2174	PA2174	hypothetical protein	1.86	2395944	2396252	-
PA5285	PA5285	hypothetical protein	1.86	5950034	5950351	-
Ser_tRNA	PA0905.1	Ser tRNA	1.85	991260	991350	+
xcpT	PA3101	general secretion pathway protein G	1.85	3480246	3480692	-
PA3451	PA3451	hypothetical protein	1.85	3856337	3856546	+
algX	PA3546	alginate biosynthesis protein AlgX	1.85	3971586	3973010	+
Gln_tRNA	PA4669.1	Gln tRNA	1.85	5238277	5238351	+
PA1797	PA1797	hypothetical protein	1.84	1948502	1950334	-
PA4154	PA4154	hypothetical protein	1.84	4647895	4648563	-
PA0639	PA0639	hypothetical protein	1.83	693596	694366	+
alc	PA1515	allantoicase	1.83	1647101	1648099	-
PA2283	PA2283	hypothetical protein	1.83	2511057	2512514	+
Glu_tRNA	PA2819.3	Glu tRNA	1.83	3173837	3173912	-
orn	PA4951	oligoribonuclease	1.83	5556281	5556823	-
PA0578	PA0578	hypothetical protein	1.81	638381	638830	-
ptrB	PA0612	repressor, PtrB	1.81	674419	674619	+
PA2572	PA2572	two-component response regulator	1.81	2907656	2908999	+
xcpS	PA3102	general secretion pathway protein F	1.81	3480697	3481914	-
PA0622	PA0622	bacteriophage protein	1.8	681394	682554	+
PA1782	PA1782	serine/threonine-protein kinase	1.8	1928894	1930489	-
PA3054	PA3054	hypothetical protein	1.8	3418288	3420192	+
mreC	PA4480	rod shape-determining protein MreC	1.8	5011322	5012314	-
PA0627	PA0627	hypothetical protein	1.79	686693	686899	+
PA2019	PA2019	periplasmic multidrug efflux lipoprotein	1.79	2211322	2212512	-
ada	PA2118	O6-methylguanine-DNA methyltransferase	1.79	2329348	2330424	+
PA2656	PA2656	two-component sensor	1.79	3006005	3007342	-
PA2658	PA2658	hypothetical protein	1.79	3008010	3008324	-
PA0894	PA0894	hypothetical protein	1.78	977420	977743	-
phnB	PA1002	anthranilate synthase component II	1.78	1085542	1086144	+
ampDh3	PA0807	AmpDh3	1.77	884799	885566	+
Arg_tRNA	PA0905.2	Arg tRNA	1.77	991468	991544	+
xcpY	PA3096	general secretion pathway protein L	1.77	3476482	3477630	-
PA0624	PA0624	hypothetical protein	1.76	683085	683429	+
pmtA	PA0798	phospholipid methyltransferase	1.76	875953	876603	+
PA1732	PA1732	hypothetical protein	1.76	1874967	1875767	+
PA3316	PA3316	ABC transporter permease	1.76	3718435	3719205	+
Tyr_tRNA	PA4277.3	Tyr tRNA	1.76	4785788	4785872	-
PA1607	PA1607	hypothetical protein	1.75	1749349	1749789	-
xcpR	PA3103	general secretion pathway protein E	1.75	3481914	3483422	-
PA4059	PA4059	hypothetical protein	1.75	4539156	4539533	+
PA4637	PA4637	hypothetical protein	1.75	5206209	5206487	-
Pro_tRNA	PA4541.2	Pro tRNA	1.74	5087011	5087087	-
PA0250	PA0250	hypothetical protein	1.73	282323	282757	-
PA1514	PA1514	ureidoglycolate hydrolase	1.73	1646537	1647046	-
glgP	PA2144	glycogen phosphorylase	1.73	2358364	2360802	+
vqsM	PA2227	AraC family transcriptional regulator	1.73	2448568	2449545	-
PA2111	PA2111	hypothetical protein	1.72	2322068	2322781	-
PA3288	PA3288	hypothetical protein	1.72	3680465	3680968	-
PA1559	PA1559	hypothetical protein	1.71	1697188	1697919	+
PA2774	PA2774	hypothetical protein	1.71	3132229	3132816	-
PA4574	PA4574	hypothetical protein	1.71	5121899	5122387	-
PA0098	PA0098	3-oxoacyl-ACP synthase	1.7	119127	120164	+
crfX	PA1774	CrfX protein	1.7	1919322	1919576	+
wspC	PA3706	protein methyltransferase	1.7	4148931	4150199	-
Asn_tRNA	PA4541.3	Asn tRNA	1.7	5087097	5087172	-
PA0446	PA0446	hypothetical protein	1.69	501376	502599	-
PA0628	PA0628	hypothetical protein	1.69	686957	687946	+
ccmA	PA1475	cytochrome C biogenesis protein CcmA	1.69	1602179	1602880	+
PA2370	PA2370	hypothetical protein	1.69	2619695	2620711	+
PA2840	PA2840	ATP-dependent RNA helicase	1.69	3193886	3195589	-
ampC	PA4110	beta-lactamase	1.69	4594029	4595222	+
PA4377	PA4377	hypothetical protein	1.69	4909162	4909404	-
tpiA	PA4748	triosephosphate isomerase	1.69	5332746	5333501	-
PA1214	PA1214	hypothetical protein	1.68	1314318	1315916	-
PA1425	PA1425	ABC transporter ATP-binding protein	1.68	1550984	1552600	+
PA2117	PA2117	hypothetical protein	1.68	2328176	2329156	-
PA2286	PA2286	hypothetical protein	1.68	2513842	2515386	+
ambE	PA2302	protein AmbE	1.68	2532669	2539043	-
PA4364	PA4364	hypothetical protein	1.68	4892345	4892746	+
PA0633	PA0633	hypothetical protein	1.67	689537	690031	+
PA2358	PA2358	hypothetical protein	1.67	2605435	2605824	-
PA2683	PA2683	serine/threonine dehydratase	1.67	3030436	3031398	-
rluA	PA3246	pseudouridine synthase	1.67	3632788	3633423	+
wspD	PA3705	hypothetical protein	1.67	4148249	4148938	-
PA4058	PA4058	hypothetical protein	1.67	4538689	4539159	+
PA4131	PA4131	iron-sulfur protein	1.67	4619314	4621035	+
PA0459	PA0459	ClpA/B protease ATP binding subunit	1.66	518083	520635	+
PA0588	PA0588	hypothetical protein	1.66	646730	648652	-
PA1363	PA1363	sigma-70 factor, ECF subfamily	1.66	1474727	1475467	+
PA2573	PA2573	chemotaxis transducer	1.66	2909010	2910617	-
Gly_tRNA	PA2583.1	Gly tRNA	1.66	2923222	2923297	-
PA0634	PA0634	hypothetical protein	1.65	690043	690390	+
PA2657	PA2657	two-component response regulator	1.65	3007339	3008010	-
oprI	PA2853	Outer membrane lipoprotein OprI precursor	1.64	3206915	3207166	+
PA3520	PA3520	hypothetical protein	1.64	3937238	3937432	-
PA4611	PA4611	hypothetical protein	1.64	5169251	5169505	-
PA5103	PA5103	hypothetical protein	1.64	5746849	5747871	-
rpsU	PA0579	30S ribosomal protein S21	1.63	638900	639115	-
PA0619	PA0619	bacteriophage protein	1.63	678286	678819	+
PA1516	PA1516	hypothetical protein	1.63	1648117	1648632	-
PA2659	PA2659	hypothetical protein	1.63	3008324	3008632	-
PA4426	PA4426	hypothetical protein	1.63	4960516	4961094	+
PA4535	PA4535	hypothetical protein	1.63	5076435	5077064	+
trmA	PA4720	tRNA (uracil-5-)-methyltransferase	1.63	5299189	5300280	+
PA5359	PA5359	hypothetical protein	1.63	6026219	6026674	-
PA5470	PA5470	peptide chain release factor-like protein	1.63	6158949	6159563	-
PA0109	PA0109	hypothetical protein	1.62	131583	131792	-
PA0623	PA0623	bacteriophage protein	1.62	682567	683070	+
PA1324.1	PA1324.1		1.62	1436491	1436618	+
bglX	PA1726	beta-glucosidase	1.62	1866241	1868535	-
PA2148	PA2148	hypothetical protein	1.62	2364311	2364802	+
msuD	PA2356	methanesulfonate sulfonatase MsuD	1.62	2603560	2604705	-
PA4874	PA4874	hypothetical protein	1.62	5471626	5472042	-
PA0099	PA0099	hypothetical protein	1.61	120164	121324	+
PA0625	PA0625	hypothetical protein	1.61	683599	685836	+
ibpA	PA3126	heat-shock protein IbpA	1.61	3508717	3509166	-
algA	PA3551	phosphomannose isomerase / guanosine 5'-diphospho-D-mannose pyrophosphorylase	1.61	3978031	3979476	+
fepC	PA4158	ferric enterobactin transporter FepC	1.61	4653509	4654306	-
PA4789	PA4789	hypothetical protein	1.61	5377791	5378096	+
PA0635	PA0635	hypothetical protein	1.6	690420	690674	+
PA0637	PA0637	hypothetical protein	1.6	692549	692890	+
xthA	PA2545	exonuclease III	1.6	2876555	2877367	+
PA0617	PA0617	bacteriophage protein	1.59	677083	677409	+
PA2018	PA2018	multidrug efflux protein	1.59	2208169	2211306	-
PA2072	PA2072	hypothetical protein	1.59	2274740	2277334	+
PA2108	PA2108	thiamine pyrophosphate protein	1.59	2318795	2320567	+
PA0631	PA0631	hypothetical protein	1.58	688964	689221	+
PA0806	PA0806	hypothetical protein	1.58	883777	884172	+
PA2352	PA2352	glycerophosphoryl diester phosphodiesterase	1.58	2598700	2599827	+
PA2430	PA2430	hypothetical protein	1.58	2724767	2725771	-
PA3496	PA3496	hypothetical protein	1.58	3913876	3914055	+
Gly_tRNA	PA4277.2	Gly tRNA	1.58	4785688	4785761	-
PA4291	PA4291	hypothetical protein	1.58	4814213	4814899	+
PA4607	PA4607	hypothetical protein	1.58	5166191	5166697	-
hslV	PA5053	ATP-dependent protease peptidase subunit	1.58	5692576	5693109	+
rsmA	PA0905	carbon storage regulator	1.57	991013	991198	+
PA2775	PA2775	hypothetical protein	1.57	3132821	3133258	-
Glu_tRNA	PA3133.3	Glu tRNA	1.57	3515014	3515089	-
PA0150	PA0150	transmembrane sensor	1.56	169903	170898	+
speD	PA0654	S-adenosylmethionine decarboxylase	1.56	707686	708480	+
PA0887.1	PA0887.1		1.56	971858	971972	+
cysI	PA1838	sulfite reductase	1.56	1995148	1996806	-
PA2116	PA2116	hypothetical protein	1.56	2327394	2328191	+
copS	PA2810	two-component sensor, CopS	1.56	3163382	3164713	+
acpP	PA2966	acyl carrier protein	1.56	3324947	3325183	-
wbpH	PA3149	glycosyltransferase WbpH	1.56	3532812	3533933	-
algL	PA3547	poly(beta-D-mannuronate) lyase	1.56	3973014	3974117	+
narK1	PA3877	nitrite extrusion protein 1	1.56	4343540	4344835	-
PA4350	PA4350	hypothetical protein	1.56	4878790	4879545	+
PA0484	PA0484	hypothetical protein	1.55	545129	545644	+
PA0774	PA0774	hypothetical protein	1.55	841913	842881	-
PA1791	PA1791	hypothetical protein	1.55	1940255	1941586	-
PA2020	PA2020	transcriptional regulator	1.55	2212677	2213309	+
PA2372	PA2372	hypothetical protein	1.55	2623284	2623856	+
PA2744.1	PA2744.1		1.55	3106919	3106994	-
PA3315	PA3315	ABC transporter permease	1.55	3717605	3718438	+
PA3472	PA3472	hypothetical protein	1.55	3885711	3886307	+
algE	PA3544	Alginate production outer membrane protein AlgE	1.55	3968449	3969921	+
adk	PA3686	adenylate kinase	1.55	4126948	4127595	-
PA0110	PA0110	hypothetical protein	1.54	131808	132602	+
Met_tRNA	PA0574.1	Met tRNA	1.54	630434	630510	-
PA0586	PA0586	SpoVR family protein	1.54	643808	645361	-
PA0626	PA0626	hypothetical protein	1.54	685846	686718	+
PA1510	PA1510	hypothetical protein	1.54	1639791	1641500	-
PA1824	PA1824	hypothetical protein	1.54	1983509	1984288	-
PA1830	PA1830	hypothetical protein	1.54	1989109	1989423	-
PA2773	PA2773	hypothetical protein	1.54	3131509	3132030	-
PA3358	PA3358	hypothetical protein	1.54	3769587	3770465	+
PA3986	PA3986	hypothetical protein	1.54	4466323	4466754	-
comL	PA4545	competence protein ComL	1.54	5091961	5092986	+
PA5471	PA5471	hypothetical protein	1.54	6159560	6160699	-
PA0329	PA0329	hypothetical protein	1.53	370706	371038	-
PA1354	PA1354	hypothetical protein	1.53	1467938	1468363	-
folE2	PA1674	GTP cyclohydrolase I	1.53	1825495	1826040	-
PA1688	PA1688	hypothetical protein	1.53	1837388	1838257	+
PA1945	PA1945	transcriptional regulator	1.53	2129307	2130635	+
PA2112	PA2112	LamB/YcsF family protein	1.53	2322778	2323521	-
PA2224	PA2224	hypothetical protein	1.53	2446597	2447325	-
ambB	PA2305	protein AmbB	1.53	2541197	2544946	-
PA2364	PA2364	hypothetical protein	1.53	2614208	2614684	-
PA3129	PA3129	hypothetical protein	1.53	3510905	3511864	-
wspF	PA3703	chemotaxis-specific methylesterase	1.53	4144939	4145946	-
PA4118	PA4118	hypothetical protein	1.53	4606885	4607454	+
PA1517	PA1517	hypothetical protein	1.52	1648629	1649555	-
PA2109	PA2109	hypothetical protein	1.52	2320586	2321062	-
pslO	PA2245	hypothetical protein	1.52	2472104	2472409	+
PA3089	PA3089	hypothetical protein	1.52	3467085	3468050	+
PA3920	PA3920	metal transporting P-type ATPase	1.52	4389231	4391609	+
PA4060	PA4060	hypothetical protein	1.52	4539539	4539817	+
PA4781	PA4781	cyclic di-GMP phosphodiesterase	1.52	5369187	5370368	-
PA0629	PA0629	hypothetical protein	1.51	687979	688608	+
PA2040	PA2040	glutamine synthetase	1.51	2230689	2232065	+
PA2772	PA2772	hypothetical protein	1.51	3130761	3131159	-
PA2817	PA2817	hypothetical protein	1.51	3171121	3171531	+
PA3683	PA3683	hypothetical protein	1.51	4124858	4125724	-
PA4113	PA4113	sugar efflux transporter	1.51	4600230	4601420	-
PA4684	PA4684	hypothetical protein	1.51	5252758	5254056	+
PA5046	PA5046	malic enzyme	1.51	5683471	5684739	-
aspA	PA5429	aspartate ammonia-lyase	1.51	6109260	6110684	+
atpI	PA5561	F0F1 ATP synthase subunit I	1.51	6254428	6254808	-
PA0092	PA0092	hypothetical protein	1.5	113022	113306	-
PA0826.1	PA0826.1	tmRNA tag peptide	1.5	901746	901779	-
hcnC	PA2195	hydrogen cyanide synthase HcnC	1.5	2414254	2415507	+
PA3179	PA3179	hypothetical protein	1.5	3569106	3570266	-
crcZ	PA4726.11		1.5	5308587	5308993	+
secG	PA4747	preprotein translocase subunit SecG	1.5	5332354	5332743	-
PA4753	PA4753	hypothetical protein	1.5	5338618	5338932	+
PA0332	PA0332	hypothetical protein	1.49	373725	374192	+
PA1869	PA1869	acyl carrier protein	1.49	2031466	2031705	+
mexE	PA2493	Resistance-Nodulation-cell Division (RND) multidrug efflux membrane fusion protein MexE precursor	1.49	2808743	2809987	+
ldh	PA3418	leucine dehydrogenase	1.49	3824748	3825773	-
PA3818	PA3818	extragenic suppressor protein SuhB	1.49	4274502	4275317	+
PA5048	PA5048	nuclease	1.49	5686278	5687045	-
PA5226	PA5226	hypothetical protein	1.49	5883664	5883975	+
cls	PA5394	cardiolipin synthetase	1.49	6071912	6073384	-
PA0070	PA0070	hypothetical protein	1.48	82404	83318	-
PA0616	PA0616	hypothetical protein	1.48	676373	676930	+
PA0947	PA0947	DNA replication initiation factor	1.48	1035277	1035981	+
PA0977	PA0977	hypothetical protein	1.48	1060510	1060833	-
PA1117	PA1117	hypothetical protein	1.48	1211407	1211781	-
PA1360	PA1360	hypothetical protein	1.48	1471671	1472564	+
gbuR	PA1422	protein GbuR	1.48	1547437	1548330	+
PA1513	PA1513	hypothetical protein	1.48	1645211	1646488	-
mexF	PA2494	Resistance-Nodulation-cell Division (RND) multidrug efflux transporter MexF	1.48	2810009	2813197	+
PA2694	PA2694	thioredoxin	1.48	3047644	3047970	-
PA2947	PA2947	hypothetical protein	1.48	3307085	3307513	+
coaD	PA0363	phosphopantetheine adenylyltransferase	1.47	406619	407098	-
PA0640	PA0640	bacteriophage protein	1.47	694421	695023	+
PA1325	PA1325	hypothetical protein	1.47	1436663	1437070	+
PA1839	PA1839	ribosomal RNA large subunit methyltransferase N	1.47	1997509	1998549	-
PA2226	PA2226	hypothetical protein	1.47	2448033	2448533	-
ambC	PA2304	protein AmbC	1.47	2540079	2541167	-
oprN	PA2495	Multidrug efflux outer membrane protein OprN precursor	1.47	2813194	2814612	+
PA2618	PA2618	arginyl-tRNA-protein transferase	1.47	2961191	2961898	+
PA2768	PA2768	hypothetical protein	1.47	3127226	3127708	+
fabG	PA2967	3-ketoacyl-ACP reductase	1.47	3325379	3326122	-
alg44	PA3542	alginate biosynthesis protein Alg44	1.47	3965842	3967011	+
moaE	PA3916	molybdopterin converting factor, large subunit	1.47	4385900	4386352	-
PA4132	PA4132	hypothetical protein	1.47	4621133	4622548	+
rpsF	PA4935	30S ribosomal protein S6	1.47	5537319	5537738	-
PA0149	PA0149	sigma-70 factor, ECF subfamily	1.46	169361	169906	+
gcp	PA0580	DNA-binding/iron metalloprotein/AP endonuclease	1.46	639316	640341	+
PA0613	PA0613	hypothetical protein	1.46	674667	675026	+
PA1152	PA1152	hypothetical protein	1.46	1246444	1246788	+
bdlA	PA1423	BdlA	1.46	1548334	1549587	-
PA2182	PA2182	hypothetical protein	1.46	2404386	2404655	-
kynA	PA2579	L-tryptophan:oxygen 2,3-oxidoreductase (decyclizing) KynA	1.46	2914966	2915832	-
PA3177	PA3177	hypothetical protein	1.46	3567606	3568529	+
PA3289	PA3289	hypothetical protein	1.46	3681048	3681461	+
wspB	PA3707	hypothetical protein	1.46	4150196	4150711	-
PA4641	PA4641	High homology to Eschericha coli PhnB	1.46	5210037	5210450	-
PA5086	PA5086	hypothetical protein	1.46	5724601	5725242	-
aotJ	PA0888	arginine/ornithine binding protein AotJ	1.45	972166	972945	+
PA1531	PA1531	hypothetical protein	1.45	1669086	1669952	-
PA1676	PA1676	hypothetical protein	1.45	1826732	1827052	-
PA1958	PA1958	transporter	1.45	2142314	2142889	-
PA1960	PA1960	hypothetical protein	1.45	2144077	2144799	+
PA3473	PA3473	hypothetical protein	1.45	3886328	3887227	-
wspE	PA3704	chemotaxis sensor/effector fusion protein	1.45	4145943	4148252	-
rpmJ	PA4242	50S ribosomal protein L36	1.45	4756979	4757095	-
PA4632	PA4632	hypothetical protein	1.45	5199503	5200324	-
PA4852	PA4852	hypothetical protein	1.45	5447648	5448646	+
PA4915	PA4915	chemotaxis transducer	1.45	5514727	5516352	+
pntAA	PA0195	NAD(P) transhydrogenase subunit alpha	1.44	224101	225219	+
PA0477	PA0477	transcriptional regulator	1.44	538217	539143	-
PA1159	PA1159	cold-shock protein	1.44	1257772	1257981	+
PA1166	PA1166	hypothetical protein	1.44	1265147	1265935	-
PA1768	PA1768	hypothetical protein	1.44	1912217	1912756	-
PA1790	PA1790	hypothetical protein	1.44	1939583	1940206	+
phrS	PA3305.1		1.44	3705309	3705521	-
potA	PA3607	polyamine transporter PotA	1.44	4041079	4042170	+
smpB	PA4768	SsrA-binding protein	1.44	5353783	5354262	+
PA4790	PA4790	hypothetical protein	1.44	5378093	5378842	+
PA4985	PA4985	hypothetical protein	1.44	5599884	5600975	-
rnk	PA5274	nucleoside diphosphate kinase regulator	1.44	5940020	5940424	-
PA0095	PA0095	hypothetical protein	1.43	115299	117524	+
PA0587	PA0587	hypothetical protein	1.43	645358	646629	-
quiP	PA1032	QuiP	1.43	1119674	1122217	-
PA1750	PA1750	phospho-2-dehydro-3-deoxyheptonate aldolase	1.43	1890739	1891815	-
PA2024	PA2024	ring-cleaving dioxygenase	1.43	2216121	2216543	-
cspD	PA2622	cold-shock protein CspD	1.43	2965201	2965473	+
PA2870	PA2870	hypothetical protein	1.43	3222150	3223727	+
PA3109	PA3109	hypothetical protein	1.43	3490136	3490678	-
PA3535	PA3535	serine protease	1.43	3954907	3957894	+
PA3979	PA3979	hypothetical protein	1.43	4459418	4459750	-
Thr_tRNA	PA4277.1	Thr tRNA	1.43	4785593	4785668	-
PA4636	PA4636	hypothetical protein	1.43	5204928	5206088	+
ipk	PA4669	4-diphosphocytidyl-2-C-methyl-D-erythritol kinase	1.43	5237393	5238241	+
napC	PA1172	cytochrome C protein NapC	1.42	1272200	1272796	-
PA2860	PA2860	hypothetical protein	1.42	3213044	3213484	-
PA3071	PA3071	hypothetical protein	1.42	3443814	3444752	+
PA3786	PA3786	hypothetical protein	1.42	4244315	4244704	-
moaD	PA3917	molybdopterin converting factor, small subunit	1.42	4386357	4386608	-
xseB	PA4042	exodeoxyribonuclease VII small subunit	1.42	4525312	4525554	+
fis	PA4853	Fis family transcriptional regulator	1.42	5448643	5448966	+
rpmE	PA5049	50S ribosomal protein L31	1.42	5687105	5687320	-
PA0071	PA0071	hypothetical protein	1.41	83380	85092	-
PA0485	PA0485	hypothetical protein	1.41	546334	547230	-
lepA	PA0767	GTP-binding protein LepA	1.41	835523	837322	+
aruE	PA0901	succinylglutamate desuccinylase	1.41	984549	985547	+
PA0916	PA0916	hypothetical protein	1.41	998444	999766	-
PA1011	PA1011	hypothetical protein	1.41	1094147	1095337	+
PA1289	PA1289	hypothetical protein	1.41	1400711	1401190	-
PA1509	PA1509	hypothetical protein	1.41	1638652	1639794	-
PA1591	PA1591	hypothetical protein	1.41	1734004	1734768	+
PA1821	PA1821	enoyl-CoA hydratase	1.41	1980165	1980977	+
PA2252	PA2252	AGCS sodium/alanine/glycine symporter	1.41	2479299	2480744	+
PA2363	PA2363	hypothetical protein	1.41	2612817	2614148	-
PA2855	PA2855	hypothetical protein	1.41	3208339	3208617	-
mmsR	PA3571	transcriptional regulator MmsR	1.41	4003733	4004656	+
accA	PA3639	acetyl-CoA carboxylase carboxyltransferase subunit alpha	1.41	4074057	4075007	-
secE	PA4276	preprotein translocase subunit SecE	1.41	4783771	4784139	-
PA4379	PA4379	hypothetical protein	1.41	4910108	4910791	-
PA4746	PA4746	hypothetical protein	1.41	5331503	5331961	-
PA4870	PA4870	hypothetical protein	1.41	5468017	5468283	-
PA5087	PA5087	hypothetical protein	1.41	5725479	5726348	-
gcvT1	PA5215	glycine cleavage system aminomethyltransferase T	1.41	5871667	5872749	-
dsbH	PA5256	disulfide bond formation protein	1.41	5917680	5918171	-
PA5286	PA5286	hypothetical protein	1.41	5950429	5950854	-
PA1745	PA1745	hypothetical protein	1.4	1887698	1888186	-
Leu_tRNA	PA1796.3	Leu tRNA	1.4	1947578	1947662	+
PA1819	PA1819	amino acid permease	1.4	1977100	1978455	+
PA1893	PA1893	hypothetical protein	1.4	2062398	2064827	-
PA2063	PA2063	hypothetical protein	1.4	2260862	2262085	+
PA2114	PA2114	major facilitator superfamily (MFS) transporter	1.4	2324808	2326079	-
ambA	PA2306	protein AmbA	1.4	2545042	2545659	-
PA2769	PA2769	hypothetical protein	1.4	3127860	3128270	-
PA2949	PA2949	lipase	1.4	3308391	3309338	+
snr1	PA3032	cytochrome C Snr1	1.4	3395325	3396728	-
pelG	PA3058	protein PelG	1.4	3421696	3423066	-
PA3073	PA3073	hypothetical protein	1.4	3445236	3446258	+
rpsP	PA3745	30S ribosomal protein S16	1.4	4196708	4196959	-
prs	PA4670	ribose-phosphate pyrophosphokinase	1.4	5238408	5239349	+
metX	PA0390	homoserine O-acetyltransferase	1.39	430630	431769	-
PA0621	PA0621	hypothetical protein	1.39	680893	681351	+
PA0860	PA0860	ABC transporter ATP-binding protein/permease	1.39	938032	939822	+
napA	PA1174	nitrate reductase catalytic subunit	1.39	1273309	1275798	-
PA2371	PA2371	ClpA/B-type protease	1.39	2620713	2623262	+
PA2770	PA2770	hypothetical protein	1.39	3128292	3129071	-
PA2811	PA2811	ABC transporter permease	1.39	3164763	3165542	-
PA3446	PA3446	NAD(P)H-dependent FMN reductase	1.39	3851920	3852513	-
katA	PA4236	catalase	1.39	4752260	4753708	-
mreD	PA4479	rod shape-determining protein MreD	1.39	5010828	5011322	-
PA4523	PA4523	hypothetical protein	1.39	5065491	5067746	-
PA4573	PA4573	hypothetical protein	1.39	5121337	5121642	-
lpd3	PA4829	dihydrolipoamide dehydrogenase	1.39	5420323	5421726	-
PA4840	PA4840	translation initiation factor Sui1	1.39	5433541	5433912	-
PA5120	PA5120	hypothetical protein	1.39	5768041	5768445	+
PA5136	PA5136	hypothetical protein	1.39	5784430	5785911	+
PA0256	PA0256	hypothetical protein	1.38	287188	288120	-
PA1736	PA1736	acetyl-CoA acetyltransferase	1.38	1878980	1880185	+
opdO	PA2113	pyroglutatmate porin OpdO	1.38	2323554	2324783	-
ambD	PA2303	protein AmbD	1.38	2539063	2540082	-
PA2313	PA2313	hypothetical protein	1.38	2550626	2551240	+
PA2946	PA2946	hypothetical protein	1.38	3305919	3307013	+
PA3076	PA3076	hypothetical protein	1.38	3449697	3450776	+
alg8	PA3541	alginate biosynthesis protein Alg8	1.38	3964275	3965759	+
rimM	PA3744	16S rRNA-processing protein RimM	1.38	4196165	4196692	-
queA	PA3824	S-adenosylmethionine--tRNA ribosyltransferase-isomerase	1.38	4280520	4281563	-
PA4292	PA4292	phosphate transporter	1.38	4815043	4816512	+
inaA	PA4378	InaA protein	1.38	4909401	4910105	-
PA5108	PA5108	hypothetical protein	1.38	5751527	5751784	-
PA0620	PA0620	bacteriophage protein	1.37	678821	680896	+
PA1205	PA1205	hypothetical protein	1.37	1304476	1305423	+
PA1518	PA1518	hypothetical protein	1.37	1649928	1650308	+
rnhA	PA1815	ribonuclease H	1.37	1972959	1973405	+
PA2164	PA2164	glycosyl hydrolase	1.37	2386595	2388346	-
hcnA	PA2193	hydrogen cyanide synthase HcnA	1.37	2412546	2412860	+
trmU	PA2626	tRNA-specific 2-thiouridylase MnmA	1.37	2969987	2971114	+
PA2776	PA2776	hypothetical protein	1.37	3133710	3134993	+
cobM	PA2948	precorrin-3 methylase	1.37	3307510	3308262	+
PA3041	PA3041	hypothetical protein	1.37	3404145	3404525	+
hepA	PA3308	ATP-dependent helicase HepA	1.37	3707090	3709942	+
PA4080	PA4080	response regulator	1.37	4559006	4559650	-
mvaT	PA4315	transcriptional regulator MvaT, P16 subunit	1.37	4843812	4844186	+
rpsO	PA4741	30S ribosomal protein S15	1.37	5325653	5325922	-
PA5181.1	PA5181.1		1.37	5835082	5835480	-
PA5466	PA5466	hypothetical protein	1.37	6155271	6156215	+
mutM	PA0357	formamidopyrimidine-DNA glycosylase	1.36	401131	401943	+
PA0641	PA0641	bacteriophage protein	1.36	695082	698696	+
PA0846	PA0846	sulfate transporter CysZ	1.36	924182	924922	-
dapA	PA1010	dihydrodipicolinate synthase	1.36	1093251	1094129	+
PA1271	PA1271	tonB-dependent receptor	1.36	1381804	1383654	+
PA1560	PA1560	hypothetical protein	1.36	1697916	1698344	+
htpG	PA1596	heat shock protein 90	1.36	1737536	1739440	+
PA2285	PA2285	hypothetical protein	1.36	2513179	2513841	+
PA3070	PA3070	hypothetical protein	1.36	3442823	3443803	+
PA3748	PA3748	hypothetical protein	1.36	4199656	4200948	+
rnpB	PA4421.1		1.36	4956328	4956536	+
PA4782	PA4782	hypothetical protein	1.36	5370476	5370721	-
PA4923	PA4923	hypothetical protein	1.36	5522386	5522973	+
PA0730	PA0730	transferase	1.35	797925	798827	-
ssrA	PA0826.2		1.35	901520	901872	-
PA0983	PA0983	hypothetical protein	1.35	1065138	1065425	+
PA1053	PA1053	hypothetical protein	1.35	1141268	1141732	+
PA2115	PA2115	transcriptional regulator	1.35	2326334	2327287	+
pslA	PA2231	protein PslA	1.35	2453667	2455103	+
mexT	PA2492	transcriptional regulator MexT	1.35	2807469	2808512	+
PA2502	PA2502	hypothetical protein	1.35	2818990	2820489	-
PA2801	PA2801	hypothetical protein	1.35	3157667	3158071	+
PA3074	PA3074	hypothetical protein	1.35	3446255	3448015	+
PA3276	PA3276	hypothetical protein	1.35	3669166	3669588	-
PA3672	PA3672	ABC transporter ATP-binding protein	1.35	4111078	4112001	-
tufB	PA4277	elongation factor Tu	1.35	4784316	4785509	-
PA4452	PA4452	hypothetical protein	1.35	4985847	4986155	-
PA4645	PA4645	hypoxanthine-guanine phosphoribosyltransferase	1.35	5212107	5212664	-
PA0068	PA0068	hypothetical protein	1.34	80752	81027	+
PA0319	PA0319	hypothetical protein	1.34	358931	359920	+
PA0736	PA0736	hypothetical protein	1.34	803072	804148	-
plcR	PA0843	phospholipase accessory protein PlcR	1.34	918617	919240	-
PA0868	PA0868	peptidyl-tRNA hydrolase	1.34	949280	949693	+
kup	PA0917	potassium uptake protein Kup	1.34	1000013	1001917	+
purM	PA0945	phosphoribosylaminoimidazole synthetase	1.34	1032763	1033824	-
PA1506	PA1506	hypothetical protein	1.34	1635908	1636237	+
PA1595	PA1595	hypothetical protein	1.34	1736189	1737418	+
folD	PA1796	bifunctional 5,10-methylene-tetrahydrofolate dehydrogenase/ 5,10-methylene-tetrahydrofolate cyclohydrolase	1.34	1946187	1947041	-
pslF	PA2236	protein PslF	1.34	2460283	2461470	+
PA2276	PA2276	transcriptional regulator	1.34	2505645	2506535	+
PA2800	PA2800	hypothetical protein	1.34	3156860	3157564	-
PA3069	PA3069	hypothetical protein	1.34	3441713	3442330	-
Asp_tRNA	PA3094.1	Asp tRNA	1.34	3475457	3475533	-
wbpG	PA3150	LPS biosynthesis protein WbpG	1.34	3533948	3535081	-
PA3723	PA3723	FMN oxidoreductase	1.34	4167711	4168817	-
PA3793	PA3793	hypothetical protein	1.34	4252677	4253009	-
PA3858	PA3858	amino acid-binding protein	1.34	4316937	4317962	-
PA3958	PA3958	hypothetical protein	1.34	4437390	4438529	+
PA4454	PA4454	hypothetical protein	1.34	4986811	4987284	-
PA5335	PA5335	hypothetical protein	1.34	6004277	6005140	+
PA0157	PA0157	Resistance-Nodulation-cell Division (RND) efflux membrane fusion protein	1.33	178455	179525	+
rpoD	PA0576	RNA polymerase sigma factor RpoD	1.33	634371	636224	-
PA0805	PA0805	hypothetical protein	1.33	882989	883216	-
PA1274	PA1274	hypothetical protein	1.33	1385670	1386326	+
PA1343	PA1343	hypothetical protein	1.33	1457175	1457633	+
PA1371	PA1371	hypothetical protein	1.33	1486266	1486967	-
PA1650	PA1650	transporter	1.33	1797058	1797951	+
Arg_tRNA	PA1796.1	Arg tRNA	1.33	1947320	1947396	+
pslH	PA2238	protein PslH	1.33	2462797	2464005	+
pyrH	PA3654	uridylate kinase	1.33	4092231	4092968	-
PA3670	PA3670	hypothetical protein	1.33	4108489	4110336	-
prfC	PA3903	peptide chain release factor 3	1.33	4371969	4373552	+
xenB	PA4356	xenobiotic reductase	1.33	4883607	4884659	+
PA4490	PA4490	hypothetical protein	1.33	5024979	5025617	-
hemA	PA4666	glutamyl-tRNA reductase	1.33	5233585	5234853	-
dksA	PA4723	suppressor protein DksA	1.33	5302386	5302832	+
PA4726.2	PA4726.2		1.33	5308743	5308964	-
PA5047	PA5047	hypothetical protein	1.33	5684842	5686281	-
phaC2	PA5058	poly(3-hydroxyalkanoic acid) synthase 2	1.33	5698359	5700041	+
PA5509	PA5509	hypothetical protein	1.33	6200966	6201634	+
exbB1	PA0198	transporter ExbB	1.32	228223	228942	+
PA0253	PA0253	transcriptional regulator	1.32	284197	284673	-
PA0361	PA0361	gamma-glutamyltranspeptidase	1.32	404386	406119	-
ung	PA0750	uracil-DNA glycosylase	1.32	818003	818698	+
rnc	PA0770	ribonuclease III	1.32	838725	839414	+
PA1116	PA1116	hypothetical protein	1.32	1210558	1211397	+
PA1361	PA1361	transporter	1.32	1472547	1473980	-
kdpD	PA1636	two-component sensor KdpD	1.32	1780536	1783193	+
bacA	PA1959	undecaprenyl pyrophosphate phosphatase	1.32	2143173	2144006	+
purB	PA2629	adenylosuccinate lyase	1.32	2972699	2974069	+
erdR	PA3604	response regulator ErdR	1.32	4038388	4039041	-
thiD	PA3975	phosphomethylpyrimidine kinase	1.32	4455887	4456684	+
PA4354	PA4354	hypothetical protein	1.32	4882053	4882355	+
PA4455	PA4455	ABC transporter permease	1.32	4987285	4988082	-
PA4736	PA4736	hypothetical protein	1.32	5321846	5322139	+
PA5088	PA5088	hypothetical protein	1.32	5726357	5727238	-
blc	PA5107	outer membrane lipoprotein Blc	1.32	5750961	5751530	-
PA5522	PA5522	glutamine synthetase	1.32	6214434	6215801	-
PA0055	PA0055	hypothetical protein	1.31	70130	70636	-
spuA	PA0297	glutamine amidotransferase	1.31	334734	335486	+
aruG	PA0897	arginine/ornithine succinyltransferase AII subunit	1.31	980357	981379	+
PA1181	PA1181	sensor protein	1.31	1279810	1283172	+
PA1682	PA1682	MFS metabolite transporter	1.31	1832014	1833165	+
pgsA	PA2584	CDP-diacylglycerol--glycerol-3-phosphate 3-phosphatidyltransferase	1.31	2923367	2923927	-
PA2914	PA2914	ABC transporter permease	1.31	3269795	3270826	+
PA3085	PA3085	hypothetical protein	1.31	3463889	3464152	-
amiL	PA3366.1		1.31	3778034	3778133	-
pyrG	PA3637	CTP synthetase	1.31	4070860	4072488	-
prfB	PA3701	peptide chain release factor 1	1.31	4142570	4143665	-
PA4347	PA4347	hypothetical protein	1.31	4875638	4876792	-
gidA	PA5565	tRNA uridine 5-carboxymethylaminomethyl modification protein GidA	1.31	6257305	6259197	-
PA0333	PA0333	hypothetical protein	1.3	374243	375514	+
PA0544	PA0544	hypothetical protein	1.3	601398	602141	-
dnaG	PA0577	DNA primase	1.3	636304	638298	-
mucC	PA0765	positive regulator for alginate biosynthesis MucC	1.3	833454	833909	+
PA0858	PA0858	hypothetical protein	1.3	936459	937397	+
cobD	PA1275	cobalamin biosynthesis protein	1.3	1386323	1387261	+
PA1769	PA1769	hypothetical protein	1.3	1913047	1913871	-
hcnB	PA2194	hydrogen cyanide synthase HcnB	1.3	2412857	2414251	+
pslC	PA2233	protein PslC	1.3	2456569	2457480	+
PA2778	PA2778	hypothetical protein	1.3	3136082	3136963	-
PA2779	PA2779	hypothetical protein	1.3	3137044	3137442	-
PA2895	PA2895	hypothetical protein	1.3	3249977	3250741	-
PA2945	PA2945	hypothetical protein	1.3	3304437	3305564	-
PA3116	PA3116	aspartate-semialdehyde dehydrogenase	1.3	3498374	3499384	-
PA3139	PA3139	aromatic amino acid aminotransferase	1.3	3522748	3523944	+
PA3178	PA3178	hypothetical protein	1.3	3568636	3569013	-
PA3674	PA3674	hypothetical protein	1.3	4114933	4115331	+
wspR	PA3702	two-component response regulator	1.3	4143788	4144831	-
PA3980	PA3980	(dimethylallyl)adenosine tRNA methylthiotransferase	1.3	4459879	4461219	+
PA4068	PA4068	epimerase	1.3	4545746	4546675	-
PA4374	PA4374	Resistance-Nodulation-cell Division (RND) efflux membrane fusion protein	1.3	4903466	4904596	+
PA4404	PA4404	hypothetical protein	1.3	4936750	4937673	-
ccpR	PA4587	cytochrome C551 peroxidase precursor	1.3	5136317	5137357	+
PA4722	PA4722	hypothetical protein	1.3	5301021	5302193	-
cat	PA0706	chloramphenicol acetyltransferase	1.29	779463	780101	-
PA1123	PA1123	hypothetical protein	1.29	1216120	1216440	-
PA1344	PA1344	short-chain dehydrogenase	1.29	1457729	1458523	+
PA1814	PA1814	hypothetical protein	1.29	1972195	1972956	+
PA1852	PA1852	hypothetical protein	1.29	2012255	2012530	-
fusA2	PA2071	elongation factor G	1.29	2272460	2274568	+
PA2361	PA2361	hypothetical protein	1.29	2608229	2612044	-
nuoA	PA2637	NADH dehydrogenase subunit A	1.29	2982781	2983194	+
cobN	PA2944	cobaltochelatase subunit CobN	1.29	3300615	3304361	-
PA3106	PA3106	oxidoreductase	1.29	3486417	3487184	-
PA3295	PA3295	HIT family protein	1.29	3688879	3689316	-
PA3669	PA3669	hypothetical protein	1.29	4107505	4108485	-
PA3826	PA3826	hypothetical protein	1.29	4283788	4284285	+
PA3828	PA3828	hypothetical protein	1.29	4285477	4286595	-
PA3833	PA3833	hypothetical protein	1.29	4290867	4291235	+
PA3854	PA3854	GIY-YIG nuclease superfamily protein	1.29	4314481	4314795	-
PA3934	PA3934	hypothetical protein	1.29	4410993	4413029	-
ribA	PA4047	GTP cyclohydrolase II	1.29	4529995	4530612	-
PA4063	PA4063	hypothetical protein	1.29	4541272	4541862	+
piv	PA4175	endopeptidase IV	1.29	4671319	4672707	+
nusG	PA4275	transcription antitermination protein NusG	1.29	4783228	4783761	-
ispB	PA4569	octaprenyl-diphosphate synthase	1.29	5116865	5117833	+
PA4713	PA4713	hypothetical protein	1.29	5292558	5293007	-
PA4801	PA4801	hypothetical protein	1.29	5386369	5386737	-
PA4972	PA4972	hypothetical protein	1.29	5580962	5581708	+
PA5130	PA5130	hypothetical protein	1.29	5777390	5777809	-
PA5133	PA5133	hypothetical protein	1.29	5780963	5782249	+
PA5271	PA5271	hypothetical protein	1.29	5935988	5936221	+
PA0258	PA0258	hypothetical protein	1.28	289205	289390	-
ostA	PA0595	organic solvent tolerance protein OstA	1.28	653753	656527	-
PA0659	PA0659	hypothetical protein	1.28	712081	713157	-
PA0801	PA0801	hypothetical protein	1.28	879557	881077	+
PA0989	PA0989	hypothetical protein	1.28	1070294	1070854	-
PA1315	PA1315	transcriptional regulator	1.28	1425140	1425754	-
rsaL	PA1431	regulatory protein RsaL	1.28	1558880	1559122	-
cmpX	PA1775	hypothetical protein	1.28	1919579	1920403	+
PA1789	PA1789	hypothetical protein	1.28	1938549	1939412	-
pqqF	PA1973	pyrroloquinoline quinone biosynthesis protein F	1.28	2155374	2157701	+
PA2569	PA2569	hypothetical protein	1.28	2904566	2904907	-
pqsH	PA2587	FAD-dependent monooxygenase	1.28	2926773	2927921	-
fabD	PA2968	malonyl CoA-ACP transacylase	1.28	3326145	3327083	-
PA3144	PA3144	hypothetical protein	1.28	3528231	3528350	-
wbpK	PA3146	NAD-dependent epimerase/dehydratase	1.28	3529508	3530458	-
ygbP	PA3633	2-C-methyl-D-erythritol 4-phosphate cytidylyltransferase	1.28	4067604	4068308	-
PA3649	PA3649	hypothetical protein	1.28	4087526	4088878	-
PA3668	PA3668	hypothetical protein	1.28	4107076	4107498	+
PA3697	PA3697	hypothetical protein	1.28	4138007	4139302	-
wspA	PA3708	chemotaxis transducer	1.28	4150716	4152344	-
PA3825	PA3825	hypothetical protein	1.28	4282078	4283658	-
holA	PA3989	DNA polymerase III subunit delta	1.28	4470274	4471311	+
bfrA	PA4235	bacterioferritin	1.28	4751665	4752129	-
uraA	PA4647	uracil permease	1.28	5213474	5214757	+
omlA	PA4765	Outer membrane lipoprotein OmlA precursor	1.28	5352177	5352707	+
prmA	PA4850	50S ribosomal protein L11 methyltransferase	1.28	5445199	5446083	+
PA5428	PA5428	transcriptional regulator	1.28	6108176	6109084	-
ygcA	PA0933	23S rRNA 5-methyluridine methyltransferase	1.27	1021616	1022968	+
PA0962	PA0962	dna-binding stress protein	1.27	1047549	1048019	-
aprI	PA1250	alkaline proteinase inhibitor AprI	1.27	1357317	1357712	+
cobO	PA1272	cob(I)yrinic acid a,c-diamide adenosyltransferase	1.27	1383718	1384329	+
PA1527	PA1527	hypothetical protein	1.27	1661412	1664900	+
PA1551	PA1551	ferredoxin	1.27	1687924	1689339	-
mltD	PA1812	membrane-bound lytic murein transglycosylase D	1.27	1969635	1971239	-
PA2791	PA2791	hypothetical protein	1.27	3148339	3148629	-
PA2828	PA2828	aminotransferase	1.27	3181137	3182348	+
PA2957	PA2957	transcriptional regulator	1.27	3316800	3317438	-
PA2963	PA2963	hypothetical protein	1.27	3321704	3322753	-
murB	PA2977	UDP-N-acetylenolpyruvoylglucosamine reductase	1.27	3336212	3337231	-
PA3048	PA3048	23S rRNA m(2)G2445 methyltransferase	1.27	3411763	3413940	-
gdhB	PA3068	NAD-dependent glutamate dehydrogenase	1.27	3436578	3441440	-
PA3075	PA3075	hypothetical protein	1.27	3448012	3449643	+
PA3211	PA3211	ABC transporter permease	1.27	3600454	3601599	+
PA3631	PA3631	hypothetical protein	1.27	4066103	4067329	+
PA3632	PA3632	hypothetical protein	1.27	4067295	4067543	+
PA3787	PA3787	hypothetical protein	1.27	4244876	4245724	+
PA3855	PA3855	hypothetical protein	1.27	4314788	4315489	-
rpsH	PA4249	30S ribosomal protein S8	1.27	4760480	4760872	-
PA4679	PA4679	hypothetical protein	1.27	5248071	5248772	-
fimX	PA4959	protein FimX	1.27	5565493	5567568	+
PA0760	PA0760	hypothetical protein	1.26	828617	828871	+
aruB	PA0899	succinylarginine dihydrolase	1.26	982885	984231	+
PA0950	PA0950	arsenate reductase	1.26	1037172	1037525	-
PA0955	PA0955	hypothetical protein	1.26	1040724	1041680	-
proS	PA0956	prolyl-tRNA synthetase	1.26	1041689	1043404	-
PA1030	PA1030	hypothetical protein	1.26	1116635	1117390	+
PA1640	PA1640	hypothetical protein	1.26	1785736	1786773	-
pscR	PA1693	type III secretion system protein	1.26	1842568	1843221	-
His_tRNA	PA1796.2	His tRNA	1.26	1947448	1947523	+
PA2813	PA2813	glutathione S-transferase	1.26	3166547	3167167	-
PA3001	PA3001	glyceraldehyde-3-phosphate dehydrogenase	1.26	3359269	3360654	-
hisF2	PA3151	imidazole glycerol phosphate synthase subunit HisF	1.26	3535216	3535971	-
PA3241	PA3241	hypothetical protein	1.26	3628430	3629599	-
PA3345	PA3345	hypothetical protein	1.26	3757243	3757593	-
ppa	PA4031	inorganic pyrophosphatase	1.26	4512549	4513076	+
PA4135	PA4135	transcriptional regulator	1.26	4624581	4625003	-
PA4461	PA4461	ABC transporter ATP-binding protein	1.26	4991919	4992644	+
PA4473	PA4473	hypothetical protein	1.26	5001822	5002424	+
PA4478	PA4478	Maf-like protein	1.26	5010134	5010739	-
PA4578	PA4578	hypothetical protein	1.26	5126166	5126654	+
PA5275	PA5275	frataxin-like protein	1.26	5940747	5941082	-
PA5510	PA5510	transporter	1.26	6201736	6203085	+
pbpG	PA0869	D-alanyl-D-alanine endopeptidase	1.25	949716	950648	-
tolA	PA0971	TolA protein	1.25	1055009	1056052	+
PA1014	PA1014	glycosyl transferase family protein	1.25	1097296	1098288	+
PA1550	PA1550	hypothetical protein	1.25	1687373	1687912	-
PA2771	PA2771	hypothetical protein	1.25	3129729	3130754	+
PA2901	PA2901	hypothetical protein	1.25	3255407	3255766	-
PA2988	PA2988	hypothetical protein	1.25	3345789	3347039	-
PA2989	PA2989	hypothetical protein	1.25	3346977	3347741	+
wzz	PA3160	O-antigen chain length regulator	1.25	3545881	3546927	-
PA3214	PA3214	hypothetical protein	1.25	3603327	3603971	+
PA3755	PA3755	hypothetical protein	1.25	4206048	4206602	+
PA3767	PA3767	hypothetical protein	1.25	4223568	4224116	-
guaB	PA3770	inosine 5'-monophosphate dehydrogenase	1.25	4227317	4228786	-
oprG	PA4067	Outer membrane protein OprG precursor	1.25	4544607	4545305	+
PA4375	PA4375	multidrug efflux protein	1.25	4904647	4907703	+
PA4456	PA4456	ABC transporter ATP-binding protein	1.25	4988082	4988891	-
PA4476	PA4476	hypothetical protein	1.25	5004798	5008628	-
upp	PA4646	uracil phosphoribosyltransferase	1.25	5212833	5213471	+
moeB	PA4663	molybdopterin biosynthesis protein MoeB	1.25	5230901	5231659	-
PA4673	PA4673	GTP-dependent nucleic acid-binding protein EngD	1.25	5240747	5241847	+
PA4716	PA4716	hypothetical protein	1.25	5295170	5296024	+
PA4773	PA4773	hypothetical protein	1.25	5361586	5362068	+
speA	PA4839	arginine decarboxylase	1.25	5431381	5433291	-
PA4924	PA4924	hypothetical protein	1.25	5522986	5523681	-
PA5178	PA5178	LysM domain/BON superfamily protein	1.25	5830313	5830750	-
PA5491	PA5491	cytochrome	1.25	6182396	6182689	-
PA5526	PA5526	hypothetical protein	1.25	6218857	6219069	-
PA0094	PA0094	hypothetical protein	1.24	114611	115045	-
putA	PA0782	bifunctional proline dehydrogenase/pyrroline-5-carboxylate dehydrogenase	1.24	851783	854965	+
PA0968	PA0968	hypothetical protein	1.24	1053400	1053846	+
PA1192	PA1192	hypothetical protein	1.24	1293267	1294091	+
cycH	PA1483	cytochrome C biogenesis protein	1.24	1608068	1609291	+
uvrC	PA2585	excinuclease ABC subunit C	1.24	2923961	2925787	-
PA2780	PA2780	hypothetical protein	1.24	3137850	3138194	+
PA3230	PA3230	hypothetical protein	1.24	3617343	3618467	-
fdxA	PA3621	ferredoxin I	1.24	4057159	4057482	+
opr86	PA3648	outer membrane protein Opr86	1.24	4085062	4087455	-
PA3716	PA3716	hypothetical protein	1.24	4161973	4163679	-
PA3945	PA3945	hypothetical protein	1.24	4422407	4422997	-
PA3978	PA3978	hypothetical protein	1.24	4458854	4459402	+
PA4457	PA4457	arabinose-5-phosphate isomerase KdsD	1.24	4989305	4990285	+
PA4536	PA4536	hypothetical protein	1.24	5077061	5077510	+
prfA	PA4665	peptide chain release factor 1	1.24	5232485	5233567	-
ilvE	PA5013	branched-chain amino acid aminotransferase	1.24	5631947	5632870	-
metY	PA5025	O-acetylhomoserine aminocarboxypropyltransferase	1.24	5655648	5656925	+
PA5076	PA5076	ABC transporter	1.24	5713232	5714032	-
ubiA	PA5358	4-hydroxybenzoate octaprenyltransferase	1.24	6025305	6026195	+
phoB	PA5360	two-component response regulator PhoB	1.24	6026779	6027468	+
wzt	PA5450	ABC transporter	1.24	6139604	6140869	-
PA5472	PA5472	hypothetical protein	1.24	6161067	6161867	-
PA5477	PA5477	hypothetical protein	1.24	6167783	6168823	+
PA0158	PA0158	Resistance-Nodulation-cell Division (RND) efflux transporter	1.23	179522	182569	+
PA0223	PA0223	dihydrodipicolinate synthetase	1.23	252913	253794	-
PA0356	PA0356	hypothetical protein	1.23	400248	401072	+
PA0389	PA0389	hypothetical protein	1.23	430002	430622	-
tyrZ	PA0668	tyrosyl-tRNA synthetase	1.23	720357	721556	+
aruD	PA0898	succinylglutamic semialdehyde dehydrogenase	1.23	981422	982888	+
PA0900	PA0900	hypothetical protein	1.23	984245	984535	+
PA0959	PA0959	hypothetical protein	1.23	1045832	1046461	+
tolQ	PA0969	TolQ protein	1.23	1053848	1054543	+
PA1009	PA1009	hypothetical protein	1.23	1092510	1093067	-
PA1012	PA1012	hypothetical protein	1.23	1095276	1096034	+
PA1549	PA1549	cation-transporting P-type ATPase	1.23	1684941	1687376	-
PA2366	PA2366	uricase	1.23	2615461	2616945	+
PA3086	PA3086	hypothetical protein	1.23	3464236	3465096	-
PA3480	PA3480	deoxycytidine triphosphate deaminase	1.23	3893432	3893998	-
lpxD	PA3646	UDP-3-O-[3-hydroxymyristoyl] glucosamine N-acyltransferase	1.23	4083444	4084505	-
PA3698	PA3698	hypothetical protein	1.23	4139311	4139862	-
PA3848	PA3848	hypothetical protein	1.23	4308456	4309811	+
PA3853	PA3853	transferase	1.23	4313763	4314452	-
PA4061	PA4061	thioredoxin	1.23	4539889	4540758	+
PA4340	PA4340	hypothetical protein	1.23	4868921	4869493	-
PA4775	PA4775	hypothetical protein	1.23	5363198	5364058	+
PA4851	PA4851	hypothetical protein	1.23	5446179	5447444	+
thiI	PA5118	thiamine biosynthesis protein ThiI	1.23	5764693	5766147	-
crc	PA5332	catabolite repression control protein	1.23	6002121	6002900	+
spuB	PA0298	glutamine synthetase	1.22	335527	336885	+
PA0648	PA0648	hypothetical protein	1.22	702828	703058	+
pilZ	PA2960	type 4 fimbrial biogenesis protein PilZ	1.22	3319674	3320030	-
wbpJ	PA3147	glycosyl transferase WbpJ	1.22	3530467	3531708	-
wbpI	PA3148	UDP-N-acetylglucosamine 2-epimerase	1.22	3531751	3532815	-
PA3764	PA3764	transglycosylase	1.22	4219841	4221199	+
PA3797	PA3797	hypothetical protein	1.22	4255458	4256252	-
bphO	PA4116	heme oxygenase, BphO	1.22	4604006	4604593	+
PA4233	PA4233	major facilitator superfamily (MFS) transporter	1.22	4747154	4748542	-
PA4531	PA4531	hypothetical protein	1.22	5074409	5074618	-
fur	PA4764	ferric uptake regulation protein	1.22	5351675	5352079	-
cueR	PA4778	protein CueR	1.22	5366257	5366655	+
miaA	PA4945	tRNA delta(2)-isopentenylpyrophosphate transferase	1.22	5548751	5549722	-
waaC	PA5011	heptosyltransferase I	1.22	5629786	5630853	-
arcB	PA5172	ornithine carbamoyltransferase	1.22	5823716	5824726	+
PA5252	PA5252	ABC transporter ATP-binding protein	1.22	5912605	5914521	-
PA5314	PA5314	hypothetical protein	1.22	5985219	5985581	+
surA	PA0594	peptidyl-prolyl cis-trans isomerase SurA	1.21	652480	653772	-
mucB	PA0764	negative regulator for alginate biosynthesis MucB	1.21	832507	833457	+
PA0856	PA0856	hypothetical protein	1.21	935427	935975	+
PA1047	PA1047	esterase	1.21	1134024	1135202	+
PA2621	PA2621	hypothetical protein	1.21	2964607	2964843	-
wbpL	PA3145	glycosyltransferase WbpL	1.21	3528428	3529447	-
wzx	PA3153	O-antigen translocase	1.21	3536576	3537811	-
wzy	PA3154	B-band O-antigen polymerase	1.21	3537808	3539124	-
arnB	PA3552	UDP-4-amino-4-deoxy-L-arabinose--oxoglutarate aminotransferase	1.21	3979860	3981008	+
map	PA3657	methionine aminopeptidase	1.21	4095172	4095957	+
ffh	PA3746	signal recognition particle protein Ffh	1.21	4197169	4198542	-
pbpA	PA4003	penicillin-binding protein 2	1.21	4483396	4485336	-
PA4015	PA4015	hypothetical protein	1.21	4494481	4494936	+
PA4069	PA4069	hypothetical protein	1.21	4546668	4547552	-
PA4488	PA4488	hypothetical protein	1.21	5018756	5020405	-
PA4532	PA4532	hypothetical protein	1.21	5074724	5075413	-
PA4735	PA4735	hypothetical protein	1.21	5318575	5321841	+
Leu_tRNA	PA4746.2	Leu tRNA	1.21	5332254	5332339	-
glnE	PA5014	bifunctional glutamine-synthetase adenylyltransferase/deadenyltransferase	1.21	5632926	5635874	-
def	PA0019	peptide deformylase	1.2	21067	21573	-
fimL	PA1822	hypothetical protein	1.2	1981017	1982705	+
PA3229	PA3229	hypothetical protein	1.2	3617044	3617310	+
PA4016	PA4016	hypothetical protein	1.2	4495126	4496865	+
ftsI	PA4418	penicillin-binding protein 3	1.2	4952604	4954343	-
PA4453	PA4453	hypothetical protein	1.2	4986152	4986799	-
PA1817	PA1817	hypothetical protein	1.19	1974238	1974627	-
azu	PA4922	azurin	1.19	5521664	5522110	-
prlC	PA0067	oligopeptidase A	1.18	78710	80755	+
PA4348	PA4348	hypothetical protein	1.18	4876821	4877606	-
fleN	PA1454	flagellar synthesis regulator FleN	-1.19	1583956	1584798	+
murA	PA4450	UDP-N-acetylglucosamine 1-carboxyvinyltransferase	-1.19	4984205	4985470	-
PA1370	PA1370	hypothetical protein	-1.2	1483898	1485763	+
zipA	PA1528	cell division protein ZipA	-1.2	1665065	1665934	+
clpX	PA1802	ATP-dependent protease ATP-binding subunit ClpX	-1.2	1954815	1956095	+
pyrB	PA0402	aspartate carbamoyltransferase	-1.21	444687	445691	-
PA0498	PA0498	hypothetical protein	-1.21	557354	558361	-
trpC	PA0651	indole-3-glycerol phosphate synthase	-1.21	705130	705966	+
fliM	PA1443	flagellar motor switch protein FliM	-1.21	1572552	1573523	+
PA3188	PA3188	sugar ABC transporter permease	-1.21	3578513	3579358	-
pagL	PA4661	lipid A 3-O-deacylase	-1.21	5229459	5229980	-
PA0744	PA0744	enoyl-CoA hydratase	-1.22	811283	812386	-
aroP1	PA3000	aromatic amino acid transporter AroP1	-1.22	3357758	3359167	-
pssA	PA4693	phosphatidylserine synthase	-1.22	5271485	5272300	-
chpA	PA0413	component of chemotactic signal transduction system	-1.23	454126	461544	+
motD	PA1461	flagellar motor protein MotD	-1.23	1591286	1592176	+
PA1570	PA1570	transcriptional regulator	-1.23	1711569	1712450	+
PA1571	PA1571	hypothetical protein	-1.23	1712519	1712698	-
PA2865	PA2865	glycosylase	-1.23	3216989	3218419	-
zwf	PA3183	glucose-6-phosphate 1-dehydrogenase	-1.23	3572324	3573793	-
PA3190	PA3190	sugar ABC transporter substrate-binding protein	-1.23	3580384	3581646	-
PA3611	PA3611	hypothetical protein	-1.23	4045160	4045570	+
PA3732	PA3732	hypothetical protein	-1.23	4182785	4183228	-
hisG	PA4449	ATP phosphoribosyltransferase	-1.23	4983552	4984187	-
Thr_tRNA	PA4524.1	Thr tRNA	-1.23	5068932	5069007	-
PA5078	PA5078	glucan biosynthesis protein G	-1.23	5716848	5718425	-
PA5245	PA5245	isoprenoid biosynthesis protein with amidotransferase-like domain	-1.23	5906626	5907294	+
wbpZ	PA5447	glycosyltransferase WbpZ	-1.23	6135968	6137113	-
gabD	PA0265	succinate-semialdehyde dehydrogenase I	-1.24	299522	300973	+
apaH	PA0590	diadenosine tetraphosphatase	-1.24	649307	650158	-
PA0727	PA0727	hypothetical protein	-1.24	794501	795793	+
bkdB	PA2249	branched-chain alpha-keto acid dehydrogenase subunit E2	-1.24	2475495	2476781	+
PA2403	PA2403	hypothetical protein	-1.24	2687497	2688708	+
gltR	PA3192	two-component response regulator GltR	-1.24	3583616	3584344	-
PA3222	PA3222	hypothetical protein	-1.24	3610250	3611149	+
PA3731	PA3731	hypothetical protein	-1.24	4182075	4182770	-
gloA3	PA5111	lactoylglutathione lyase	-1.24	5753614	5754144	-
PA0264	PA0264	hypothetical protein	-1.25	299081	299497	-
thyA	PA0342	thymidylate synthase	-1.25	384733	385527	+
PA0545	PA0545	hypothetical protein	-1.25	602346	603650	+
fda	PA0555	fructose-1,6-bisphosphate aldolase	-1.25	613338	614402	+
PA1389	PA1389	glycosyl transferase family protein	-1.25	1509562	1511046	+
liuA	PA2015	isovaleryl-CoA dehydrogenase	-1.25	2205190	2206353	-
PA2127	PA2127	hypothetical protein	-1.25	2340414	2341640	-
gapA	PA3195	glyceraldehyde 3-phosphate dehydrogenase	-1.25	3587433	3588437	+
PA3202	PA3202	hypothetical protein	-1.25	3593733	3594032	+
PA3272	PA3272	ATP-dependent DNA helicase	-1.25	3663509	3667855	-
PA4498	PA4498	metallopeptidase	-1.25	5034860	5036077	-
PA4697	PA4697	hypothetical protein	-1.25	5276283	5276735	+
PA4916	PA4916	hypothetical protein	-1.25	5516399	5517094	-
PA0454	PA0454	hypothetical protein	-1.26	510589	512790	-
braD	PA1073	branched-chain amino acid ABC transporter	-1.26	1160672	1161595	-
rbsB	PA1946	ribose ABC transporter substrate-binding protein	-1.26	2130854	2131813	+
PA2461	PA2461	hypothetical protein	-1.26	2760872	2761351	-
PA2557	PA2557	AMP-binding protein	-1.26	2890356	2892050	-
PA2879	PA2879	transcriptional regulator	-1.26	3231882	3232772	-
PA3046	PA3046	hypothetical protein	-1.26	3409609	3409953	-
PA3198	PA3198	hypothetical protein	-1.26	3590490	3591242	-
gatC	PA4482	aspartyl/glutamyl-tRNA amidotransferase subunit C	-1.26	5013671	5013961	+
PA4596	PA4596	transcriptional regulator	-1.26	5149064	5149582	+
PA5160	PA5160	drug efflux transporter	-1.26	5808368	5809897	+
PA5317	PA5317	dipeptide ABC transporter substrate-binding protein	-1.26	5986475	5988055	+
PA5377	PA5377	ABC transporter permease	-1.26	6054594	6055433	-
PA0116	PA0116	hypothetical protein	-1.27	136518	136991	+
pilH	PA0409	twitching motility protein PilH	-1.27	450093	450458	+
pilI	PA0410	twitching motility protein PilI	-1.27	450509	451045	+
PA0456	PA0456	cold-shock protein	-1.27	514775	514984	+
PA0574	PA0574	hypothetical protein	-1.27	628763	629884	-
PA0661	PA0661	hypothetical protein	-1.27	714264	714686	-
aroP2	PA0866	aromatic amino acid transporter AroP2	-1.27	947205	948623	+
lpdV	PA2250	dihydrolipoamide dehydrogenase	-1.27	2476785	2478179	+
PA2456	PA2456	hypothetical protein	-1.27	2756309	2756650	+
PA2982	PA2982	hypothetical protein	-1.27	3339677	3340117	-
foaB	PA3013	3-ketoacyl-CoA thiolase	-1.27	3373254	3374429	-
purU1	PA4314	formyltetrahydrofolate deformylase	-1.27	4842701	4843552	-
pilW	PA4552	type 4 fimbrial biogenesis protein PilW	-1.27	5099263	5100087	+
hemB	PA5243	delta-aminolevulinic acid dehydratase	-1.27	5904614	5905627	-
PA0120	PA0120	transcriptional regulator	-1.28	140216	140902	+
PA0930	PA0930	two-component sensor	-1.28	1016657	1017994	+
PA1392	PA1392	hypothetical protein	-1.28	1514036	1515280	+
PA1630	PA1630	transcriptional regulator	-1.28	1773682	1774548	+
dhcB	PA2000	dehydrocarnitine CoA transferase subunit B	-1.28	2186260	2186916	+
PA2992	PA2992	hypothetical protein	-1.28	3350411	3350638	-
PA3342	PA3342	hypothetical protein	-1.28	3752596	3753612	-
narG	PA3875	respiratory nitrate reductase subunit alpha	-1.28	4338261	4342046	-
PA4349	PA4349	hypothetical protein	-1.28	4877691	4878587	-
fumC1	PA4470	fumarate hydratase	-1.28	4998540	4999916	-
PA4604	PA4604	hypothetical protein	-1.28	5162472	5163476	-
tatA	PA5068	twin-arginine translocation protein TatA	-1.28	5706552	5706800	+
ppx	PA5241	exopolyphosphatase	-1.28	5900879	5902399	+
PA0123	PA0123	transcriptional regulator	-1.29	142359	143267	-
pcaB	PA0230	3-carboxy-cis,cis-muconate cycloisomerase	-1.29	259784	261163	+
PA0321	PA0321	acetylpolyamine aminohydrolase	-1.29	360413	361447	-
bkdR	PA2246	transcriptional regulator BkdR	-1.29	2472442	2472903	-
PA2552	PA2552	acyl-CoA dehydrogenase	-1.29	2884206	2885333	-
algI	PA3548	alginate o-acetyltransferase AlgI	-1.29	3974359	3975921	+
PA3808	PA3808	hypothetical protein	-1.29	4267145	4267345	-
PA3835	PA3835	hypothetical protein	-1.29	4294255	4294605	-
pilV	PA4551	type 4 fimbrial biogenesis protein PilV	-1.29	5098709	5099266	+
ribF	PA4561	bifunctional riboflavin kinase/FMN adenylyltransferase	-1.29	5109806	5110744	-
PA4918	PA4918	hypothetical protein	-1.29	5517821	5518480	+
PA5378	PA5378	hypothetical protein	-1.29	6055475	6056413	-
PA5545	PA5545	hypothetical protein	-1.29	6238325	6239284	-
PA0366	PA0366	aldehyde dehydrogenase	-1.3	409504	410934	-
PA0469	PA0469	hypothetical protein	-1.3	528999	529856	+
PA0747	PA0747	aldehyde dehydrogenase	-1.3	814504	816012	-
PA1075	PA1075	hypothetical protein	-1.3	1163276	1163593	+
PA1109	PA1109	transcriptional regulator	-1.3	1201310	1202089	+
PA1386	PA1386	ABC transporter ATP-binding protein	-1.3	1505749	1507017	+
PA2486	PA2486	hypothetical protein	-1.3	2803640	2803834	+
PA2550	PA2550	acyl-CoA dehydrogenase	-1.3	2881754	2882983	-
moaB2	PA3029	molybdopterin biosynthetic protein B2	-1.3	3393482	3394021	-
PA4141	PA4141	hypothetical protein	-1.3	4632477	4632776	+
tadG	PA4297	protein TadG	-1.3	4821385	4823055	-
PA4616	PA4616	c4-dicarboxylate-binding protein	-1.3	5173654	5174652	-
hemH	PA4655	ferrochelatase	-1.3	5222540	5223562	-
PA0041	PA0041	hemagglutinin	-1.31	42914	53521	+
PA0952	PA0952	hypothetical protein	-1.31	1039240	1039623	-
fliQ	PA1447	flagellar biosynthesis protein FliQ	-1.31	1575290	1575559	+
PA1520	PA1520	transcriptional regulator	-1.31	1652273	1653052	+
PA2591	PA2591	transcriptional regulator	-1.31	2933582	2934388	-
PA3187	PA3187	ABC transporter ATP-binding protein	-1.31	3577320	3578480	-
PA3422	PA3422	hypothetical protein	-1.31	3830898	3832655	-
PA3717	PA3717	peptidyl-prolyl cis-trans isomerase, FkbP-type	-1.31	4163890	4164231	+
iscA	PA3812	iron-binding protein IscA	-1.31	4270148	4270471	-
PA4126	PA4126	major facilitator superfamily (MFS) transporter	-1.31	4614024	4615328	+
PA4182	PA4182	hypothetical protein	-1.31	4678957	4679595	+
sspB	PA4427	ClpXP protease specificity-enhancing factor	-1.31	4961151	4961558	-
PA0138	PA0138	ABC transporter permease	-1.32	157108	158034	+
PA0925	PA0925	hypothetical protein	-1.32	1011047	1011454	-
cheZ	PA1457	chemotaxis protein CheZ	-1.32	1586034	1586822	+
clpP	PA1801	ATP-dependent Clp protease proteolytic subunit	-1.32	1954069	1954710	+
desB	PA4888	acyl-CoA desaturase	-1.32	5483988	5485100	-
PA0221	PA0221	aminotransferase	-1.33	250231	251613	+
PA0919	PA0919	hypothetical protein	-1.33	1002681	1003964	-
PA1153	PA1153	hypothetical protein	-1.33	1247932	1248486	-
PA1388	PA1388	hypothetical protein	-1.33	1508737	1509465	+
PA1530	PA1530	hypothetical protein	-1.33	1668455	1668832	+
pvdE	PA2397	pyoverdine biosynthesis protein PvdE	-1.33	2653435	2655084	+
foxA	PA2466	Ferrioxamine receptor FoxA	-1.33	2782764	2785226	-
PA2592	PA2592	periplasmic spermidine/putrescine-binding protein	-1.33	2934541	2935644	+
PA2760	PA2760	hypothetical protein	-1.33	3120073	3121350	+
glk	PA3193	glucokinase	-1.33	3584379	3585374	-
katB	PA4613	catalase	-1.33	5170185	5171726	-
PA5017	PA5017	hypothetical protein	-1.33	5641010	5643709	+
PA5291	PA5291	choline transporter	-1.33	5955180	5957165	+
PA5547	PA5547	hypothetical protein	-1.33	6240870	6241493	+
PA0499	PA0499	pili assembly chaperone	-1.34	558377	559078	-
PA0980	PA0980	hypothetical protein	-1.34	1062601	1062885	+
PA1398	PA1398	hypothetical protein	-1.34	1519627	1519968	+
PA1572	PA1572	hypothetical protein	-1.34	1712908	1714053	+
dhcR	PA1998	transcriptional regulator DhcR	-1.34	2184475	2185395	-
bkdA2	PA2248	2-oxoisovalerate dehydrogenase subunit beta	-1.34	2474442	2475494	+
moeA2	PA3028	molybdenum cofactor biosynthesis protein A2	-1.34	3392268	3393485	-
mqoA	PA3452	malate:quinone oxidoreductase	-1.34	3856749	3858320	+
nhaP	PA3887	Na+/H+ antiporter NhaP	-1.34	4352828	4354102	-
pilC	PA4527	type 4 fimbrial biogenesis protein PilC	-1.34	5071567	5072691	+
hisI	PA5066	phosphoribosyl-AMP cyclohydrolase	-1.34	5705794	5706198	+
pcaH	PA0153	protocatechuate 3,4-dioxygenase subunit beta	-1.35	174773	175492	+
pilJ	PA0411	twitching motility protein PilJ	-1.35	451130	453178	+
PA0496	PA0496	hypothetical protein	-1.35	555251	556228	+
motC	PA1460	flagellar motor protein	-1.35	1590533	1591273	+
PA1608	PA1608	chemotaxis transducer	-1.35	1749895	1751520	-
PA1654	PA1654	aminotransferase	-1.35	1800629	1801795	+
PA1760	PA1760	transcriptional regulator	-1.35	1901524	1904247	+
PA1887	PA1887	hypothetical protein	-1.35	2057278	2057946	-
PA2281	PA2281	transcriptional regulator	-1.35	2509480	2510334	-
pvdT	PA2390	protein PvdT	-1.35	2643306	2645297	+
PA3277	PA3277	short-chain dehydrogenase	-1.35	3669821	3670633	-
PA3497	PA3497	hypothetical protein	-1.35	3914117	3915337	-
PA4143	PA4143	toxin transporter	-1.35	4634139	4636298	+
PA5154	PA5154	ABC transporter permease	-1.35	5802129	5802824	+
PA5283	PA5283	transcriptional regulator	-1.35	5947295	5948671	+
PA5348	PA5348	DNA-binding protein	-1.35	6017150	6017422	-
PA5442	PA5442	hypothetical protein	-1.35	6128056	6130911	-
PA0119	PA0119	C4-dicarboxylate transporter DctA	-1.36	138818	140167	+
atsA	PA0183	arylsulfatase	-1.36	207923	209533	-
PA0979	PA0979	hypothetical protein	-1.36	1062061	1062369	-
PA1287	PA1287	glutathione peroxidase	-1.36	1398618	1399172	+
PA1442	PA1442	flagellar basal body protein FliL	-1.36	1572023	1572544	+
cheY	PA1456	chemotaxis protein CheY	-1.36	1585640	1586014	+
pscU	PA1690	translocation protein in type III secretion	-1.36	1840468	1841517	-
ohrR	PA2849	OhrR	-1.36	3203398	3203853	+
nosD	PA3393	NosD protein	-1.36	3798916	3800202	+
mifS	PA5512	MifS	-1.36	6204444	6206210	-
PA0954	PA0954	acylphosphatase	-1.37	1040432	1040707	+
pqqE	PA1989	pyrroloquinoline quinone biosynthesis protein PqqE	-1.37	2173912	2175057	+
pvdF	PA2396	pyoverdine synthetase F	-1.37	2652230	2653057	-
PA2455	PA2455	hypothetical protein	-1.37	2755725	2756252	+
PA2457	PA2457	hypothetical protein	-1.37	2756918	2757898	+
PA3215	PA3215	transcriptional regulator	-1.37	3603994	3605007	-
fdx2	PA3809	(2Fe-2S) ferredoxin	-1.37	4267372	4267710	-
PA4170	PA4170	hypothetical protein	-1.37	4666836	4667768	+
PA4606	PA4606	hypothetical protein	-1.37	5163788	5165854	-
lldP	PA4770	L-lactate permease	-1.37	5355387	5357075	+
PA0191	PA0191	transcriptional regulator	-1.38	217905	218822	-
PA0338	PA0338	hypothetical protein	-1.38	380903	382033	+
vfr	PA0652	cAMP-regulatory protein	-1.38	706028	706672	-
PA0826	PA0826	hypothetical protein	-1.38	900408	901046	-
PA1465	PA1465	hypothetical protein	-1.38	1594597	1595004	+
lig	PA1529	NAD-dependent DNA ligase LigA	-1.38	1666025	1668409	+
PA1646	PA1646	chemotaxis transducer	-1.38	1791080	1793038	+
PA2501	PA2501	hypothetical protein	-1.38	2818719	2818886	-
PA2669	PA2669	hypothetical protein	-1.38	3017234	3017818	-
PA3189	PA3189	ABC sugar transporter permease	-1.38	3579351	3580283	-
PA3271	PA3271	two-component sensor	-1.38	3660022	3663501	+
hscA	PA3810	chaperone protein HscA	-1.38	4267717	4269576	-
PA4503	PA4503	ABC transporter permease	-1.38	5042068	5043078	+
lytB	PA4557	4-hydroxy-3-methylbut-2-enyl diphosphate reductase	-1.38	5104986	5105930	-
hisE	PA5067	phosphoribosyl-ATP pyrophosphatase	-1.38	5706191	5706526	+
soxA	PA5418	sarcosine oxidase subunit alpha	-1.38	6097024	6100041	+
PA0181	PA0181	transcriptional regulator	-1.39	206022	206954	-
PA1139	PA1139	hypothetical protein	-1.39	1230310	1231158	+
PA1473	PA1473	hypothetical protein	-1.39	1600083	1600418	-
pscL	PA1725	type III secretion system protein	-1.39	1865494	1866138	+
PA1873	PA1873	hypothetical protein	-1.39	2034918	2035940	-
pvdD	PA2399	pyoverdine synthetase D	-1.39	2657798	2665144	-
PA3260	PA3260	transcriptional regulator	-1.39	3647755	3648066	-
PA3759	PA3759	aminotransferase	-1.39	4209256	4210278	+
acoB	PA4151	acetoin catabolism protein AcoB	-1.39	4644578	4645597	+
PA4589	PA4589	hypothetical protein	-1.39	5139050	5140441	-
PA4802	PA4802	hypothetical protein	-1.39	5387000	5387722	+
PA0252	PA0252	hypothetical protein	-1.4	283818	284105	-
PA0507	PA0507	acyl-CoA dehydrogenase	-1.4	566932	568728	+
PA0728	PA0728	bacteriophage integrase	-1.4	795793	796776	+
PA0886	PA0886	C4-dicarboxylate transporter	-1.4	968205	969488	+
PA0929	PA0929	two-component response regulator	-1.4	1015938	1016657	+
PA1322	PA1322	TonB-dependent receptor	-1.4	1433166	1435364	+
PA1974	PA1974	hypothetical protein	-1.4	2157968	2159167	+
bkdA1	PA2247	2-oxoisovalerate dehydrogenase subunit alpha	-1.4	2473213	2474445	+
pvdJ	PA2400	protein PvdJ	-1.4	2665156	2671629	-
PA2679	PA2679	hypothetical protein	-1.4	3026100	3026852	-
flgM	PA3351	protein FlgM	-1.4	3762804	3763127	+
PA3403	PA3403	hypothetical protein	-1.4	3808318	3808803	-
exoS	PA3841	exoenzyme S	-1.4	4303141	4304502	-
PA4070	PA4070	FeaR family transcriptional regulator	-1.4	4547821	4548771	-
ppgL	PA4204	periplasmic gluconolactonase, PpgL	-1.4	4704139	4705305	+
PA4897	PA4897	hypothetical protein	-1.4	5491346	5494315	+
PA5090	PA5090	hypothetical protein	-1.4	5729473	5731845	-
PA5155	PA5155	amino acid (lysine/arginine/ornithine/histidine/octopine) ABC transporter membrane protein	-1.4	5802821	5803513	+
tolB	PA0972	translocation protein TolB	-1.41	1056049	1057347	+
PA2993	PA2993	hypothetical protein	-1.41	3350635	3351663	-
PA3039	PA3039	transporter	-1.41	3402134	3403516	-
rfaD	PA3337	ADP-L-glycero-D-manno-heptose-6-epimerase	-1.41	3746078	3747076	-
PA3343	PA3343	hypothetical protein	-1.41	3753763	3754932	-
PA3352	PA3352	hypothetical protein	-1.41	3763182	3763652	+
PA3904	PA3904	hypothetical protein	-1.41	4373938	4374333	+
PA4858	PA4858	hypothetical protein	-1.41	5456452	5457717	+
PA0359	PA0359	hypothetical protein	-1.42	402681	403025	+
putP	PA0783	sodium/proline symporter PutP	-1.42	855277	856797	+
PA0845	PA0845	hypothetical protein	-1.42	921792	923804	-
PA0939	PA0939	hypothetical protein	-1.42	1029825	1030151	-
PA1040	PA1040	hypothetical protein	-1.42	1126341	1126838	-
PA1462	PA1462	plasmid partitioning protein	-1.42	1592271	1593059	+
PA1765	PA1765	hypothetical protein	-1.42	1908454	1909641	+
PA2555	PA2555	AMP-binding protein	-1.42	2887357	2889024	-
PA4122	PA4122	hypothetical protein	-1.42	4610237	4611016	+
PA4198	PA4198	acyl-CoA synthetase	-1.42	4696281	4697903	+
PA4506	PA4506	peptide ABC transporter ATP-binding protein	-1.42	5045028	5045999	+
PA4805	PA4805	hypothetical protein	-1.42	5390148	5391554	-
PA4899	PA4899	aldehyde dehydrogenase	-1.42	5495821	5497290	-
PA0660	PA0660	hypothetical protein	-1.43	713279	714247	-
PA0746	PA0746	acyl-CoA dehydrogenase	-1.43	813329	814492	-
cysC	PA1393	adenosine 5'-phosphosulfate (APS) kinase	-1.43	1515337	1515927	-
xqhA	PA1868	secretion protein XqhA	-1.43	2028968	2031298	+
PA2481	PA2481	hypothetical protein	-1.43	2799910	2800785	-
PA2500	PA2500	major facilitator superfamily (MFS) transporter	-1.43	2817449	2818675	+
PA2761	PA2761	hypothetical protein	-1.43	3121462	3121878	+
PA4709	PA4709	hemin degrading factor	-1.43	5287972	5289036	-
fiuA	PA0470	ferrichrome receptor FiuA	-1.44	530029	532437	-
PA0781	PA0781	hypothetical protein	-1.44	849256	851319	-
PA1573	PA1573	hypothetical protein	-1.44	1714064	1714660	+
PA1739	PA1739	oxidoreductase	-1.44	1883661	1884632	+
ercS'	PA1976	ErcS protein	-1.44	2160363	2163008	+
PA2568	PA2568	hypothetical protein	-1.44	2904040	2904447	-
aceA	PA2634	isocitrate lyase	-1.44	2977756	2979351	+
PA2676	PA2676	type II secretion system protein	-1.44	3021796	3022983	-
phoA	PA3296	alkaline phosphatase	-1.44	3689521	3690951	+
PA5293	PA5293	transcriptional regulator	-1.44	5958408	5959325	-
dgcA	PA5398	dimethylglycine catabolism protein DgcA	-1.44	6075880	6077940	+
PA0192	PA0192	TonB-dependent receptor	-1.45	219172	221544	+
phnX	PA1311	phosphonoacetaldehyde hydrolase	-1.45	1421477	1422304	+
pscJ	PA1723	type III export protein PscJ	-1.45	1864134	1864880	+
PA2077	PA2077	hypothetical protein	-1.45	2283419	2285323	-
PA2935	PA2935	hypothetical protein	-1.45	3290694	3291173	-
ribB	PA4054	bifunctional 3,4-dihydroxy-2-butanone 4-phosphate synthase/GTP cyclohydrolase II-like protein	-1.45	4534710	4535807	-
PA4150	PA4150	dehydrogenase E1 component	-1.45	4643571	4644545	+
fpvB	PA4168	second ferric pyoverdine receptor FpvB	-1.45	4663854	4666262	+
PA4392	PA4392	hypothetical protein	-1.45	4921981	4922364	+
panC	PA4730	pantoate--beta-alanine ligase	-1.45	5312261	5313112	+
argH	PA5263	argininosuccinate lyase	-1.45	5924596	5925990	+
PA0879	PA0879	acyl-CoA dehydrogenase	-1.46	961370	962530	+
braC	PA1074	branched-chain amino acid ABC transporter	-1.46	1161856	1162977	-
PA1669	PA1669	hypothetical protein	-1.46	1819074	1822601	+
PA2553	PA2553	acyl-CoA thiolase	-1.46	2885362	2886552	-
lipH	PA2863	lipase chaperone	-1.46	3215423	3216289	+
PA3331	PA3331	cytochrome P450	-1.46	3741012	3742268	+
PA3512	PA3512	ABC transporter permease	-1.46	3927558	3928334	-
PA3754	PA3754	hypothetical protein	-1.46	4205296	4205907	-
PA3860	PA3860	AMP-binding protein	-1.46	4318922	4320820	-
cupB5	PA4082	adhesive protein CupB5	-1.46	4561540	4564596	-
PA4866	PA4866	hypothetical protein	-1.46	5463918	5464436	+
PA4960	PA4960	phosphoserine phosphatase	-1.46	5567655	5568944	-
PA0745	PA0745	enoyl-CoA hydratase	-1.47	812445	813263	-
PA0836.1	PA0836.1		-1.47	912791	912861	+
PA1330	PA1330	short-chain dehydrogenase	-1.47	1442069	1442848	+
PA1762	PA1762	hypothetical protein	-1.47	1904995	1905756	+
PA3027	PA3027	transcriptional regulator	-1.47	3391208	3392239	+
PA3757	PA3757	transcriptional regulator	-1.47	4207408	4208151	+
acoR	PA4147	transcriptional regulator AcoR	-1.47	4639502	4641379	-
PA4156	PA4156	TonB-dependent receptor	-1.47	4650374	4652458	-
PA4187	PA4187	major facilitator superfamily (MFS) transporter	-1.47	4683697	4685025	+
PA4469	PA4469	hypothetical protein	-1.47	4998063	4998512	-
PA4505	PA4505	ABC transporter ATP-binding protein	-1.47	5044054	5045028	+
flhF	PA1453	flagellar biosynthesis regulator FlhF	-1.48	1582528	1583817	+
PA1463	PA1463	hypothetical protein	-1.48	1593151	1594041	+
PA2511	PA2511	transcriptional regulator	-1.48	2828122	2829123	-
PA3038	PA3038	porin	-1.48	3400684	3401949	+
gltS	PA3176	glutamate/sodium ion symporter, GltS	-1.48	3566163	3567377	+
PA3752	PA3752	hypothetical protein	-1.48	4204543	4204737	-
PA3753	PA3753	hypothetical protein	-1.48	4204734	4205258	-
PA3954	PA3954	hypothetical protein	-1.48	4434150	4435244	+
rcpA	PA4304	protein RcpA	-1.48	4828379	4829629	-
PA4610	PA4610	hypothetical protein	-1.48	5168755	5169189	+
PA4675	PA4675	TonB-dependent receptor	-1.48	5243178	5245406	+
glpQ	PA0347	glycerophosphoryl diester phosphodiesterase, periplasmic	-1.49	389733	390884	-
pyoS5	PA0985	pyocin S5	-1.49	1066321	1067817	-
PA1459	PA1459	chemotaxis-specific methylesterase	-1.49	1589338	1590444	+
PA1629	PA1629	enoyl-CoA hydratase	-1.49	1772655	1773440	-
PA2802	PA2802	transcriptional regulator	-1.49	3158073	3158792	-
rocS1	PA3946	two-component sensor	-1.49	4423212	4426850	-
PA4910	PA4910	branched-chain amino acid ABC transporter ATP-binding protein	-1.49	5508682	5509554	-
PA5247	PA5247	hypothetical protein	-1.49	5907848	5908330	-
PA5266	PA5266	hypothetical protein	-1.49	5930602	5932677	-
PA0121	PA0121	hypothetical protein	-1.5	141003	141737	+
oprE	PA0291	Anaerobically-induced outer membrane porin OprE precursor	-1.5	327284	328666	+
toxR	PA0707	transcriptional regulator ToxR	-1.5	780194	780973	-
PA1474	PA1474	hypothetical protein	-1.5	1600415	1601893	-
pvdN	PA2394	protein PvdN	-1.5	2649995	2651278	+
PA3320	PA3320	hypothetical protein	-1.5	3722990	3723445	-
nosY	PA3395	NosY protein	-1.5	3801104	3801931	+
PA3513	PA3513	hypothetical protein	-1.5	3928331	3929338	-
PA3758	PA3758	N-acetylglucosamine-6-phosphate deacetylase	-1.5	4208168	4209259	+
tadC	PA4300	protein TadC	-1.5	4824121	4825032	-
gatA	PA4483	aspartyl/glutamyl-tRNA amidotransferase subunit A	-1.5	5013974	5015428	+
PA4948	PA4948	hypothetical protein	-1.5	5553117	5553584	-
PA4986	PA4986	oxidoreductase	-1.5	5601149	5603095	+
hisB	PA5143	imidazoleglycerol-phosphate dehydratase	-1.5	5791083	5791676	-
PA0739	PA0739	transcriptional regulator	-1.51	805788	806702	-
PA0794	PA0794	aconitate hydratase	-1.51	870249	872855	-
galE	PA1384	UDP-glucose 4-epimerase	-1.51	1503568	1504581	+
PA1458	PA1458	two-component sensor	-1.51	1587023	1589284	+
PA2547	PA2547	transcriptional regulator	-1.51	2877999	2878916	+
PA2604	PA2604	hypothetical protein	-1.51	2947803	2948471	+
PA3510	PA3510	hypothetical protein	-1.51	3926247	3926777	-
narH	PA3874	respiratory nitrate reductase subunit beta	-1.51	4336708	4338249	-
PA4027	PA4027	hypothetical protein	-1.51	4508408	4509301	+
sspA	PA4428	stringent starvation protein A	-1.51	4961570	4962187	-
PA5153	PA5153	amino acid ABC transporter substrate-binding protein	-1.51	5801315	5802067	+
PA0226	PA0226	CoA transferase, subunit A	-1.52	255481	256332	+
PA0323	PA0323	ABC transporter	-1.52	363278	364321	-
plcH	PA0844	hemolytic phospholipase C	-1.52	919258	921450	-
PA1558	PA1558	hypothetical protein	-1.52	1696467	1697099	+
stp1	PA1670	serine/threonine phosphoprotein phosphatase Stp1	-1.52	1822601	1823329	+
PA1907	PA1907	hypothetical protein	-1.52	2077626	2079266	-
antB	PA2513	anthranilate dioxygenase small subunit	-1.52	2830831	2831322	+
nqrA	PA2999	Na(+)-translocating NADH-quinone reductase subunit A	-1.52	3356162	3357499	-
pgl	PA3182	6-phosphogluconolactonase	-1.52	3571621	3572337	-
PA4803	PA4803	hypothetical protein	-1.52	5387990	5388607	-
PA4882	PA4882	hypothetical protein	-1.52	5478209	5478976	-
gbcA	PA5410	protein GbcA	-1.52	6085385	6086674	-
PA0602	PA0602	ABC transporter	-1.53	663515	664549	+
pvdR	PA2389	protein PvdR	-1.53	2642131	2643306	+
purT	PA3751	phosphoribosylglycinamide formyltransferase 2	-1.53	4203324	4204505	-
bifA	PA4367	protein BifA	-1.53	4894459	4896522	+
ileS	PA4560	isoleucyl-tRNA synthetase	-1.53	5106951	5109782	-
panB	PA4729	3-methyl-2-oxobutanoate hydroxymethyltransferase	-1.53	5311464	5312264	+
PA5381	PA5381	hypothetical protein	-1.53	6059823	6060200	-
dgcB	PA5399	dimethylglycine catabolism protein DgcB	-1.53	6078044	6080005	+
PA0443	PA0443	transporter	-1.54	496871	498361	+
PA0521	PA0521	cytochrome C oxidase subunit	-1.54	581133	581660	+
PA0572	PA0572	hypothetical protein	-1.54	624994	627765	-
PA0673	PA0673	hypothetical protein	-1.54	733673	733993	-
cysP	PA1493	sulfate ABC transporter substrate-binding protein	-1.54	1620345	1621343	-
PA1667	PA1667	hypothetical protein	-1.54	1816855	1818186	+
PA2126	PA2126	hypothetical protein	-1.54	2339352	2339987	-
PA3368	PA3368	acetyltransferase	-1.54	3778704	3779369	+
PA3842	PA3842	chaperone	-1.54	4304690	4305040	+
PA4121	PA4121	hypothetical protein	-1.54	4609567	4610226	+
PA4289	PA4289	transporter	-1.54	4811396	4812601	+
gatB	PA4484	aspartyl/glutamyl-tRNA amidotransferase subunit B	-1.54	5015535	5016980	+
phuR	PA4710	heme/hemoglobin uptake outer membrane receptor PhuR	-1.54	5289217	5291511	+
popD	PA1709	translocator outer membrane protein PopD precursor	-1.55	1854849	1855736	+
PA1759	PA1759	transcriptional regulator	-1.55	1898816	1901521	+
PA2097	PA2097	flavin-binding monooxygenase	-1.55	2307957	2309432	+
PA2880	PA2880	hypothetical protein	-1.55	3232819	3233334	+
PA3216	PA3216	hypothetical protein	-1.55	3605150	3605467	+
pfpI	PA0355	protease PfpI	-1.56	399493	400032	-
oprL	PA0973	peptidoglycan associated lipoprotein OprL precursor	-1.56	1057400	1057906	+
pscD	PA1717	type III export protein PscD	-1.56	1861297	1862595	+
erbR	PA1978	response regulator ErbR	-1.56	2163883	2164548	-
PA2600	PA2600	hypothetical protein	-1.56	2942848	2943915	-
PA3283	PA3283	hypothetical protein	-1.56	3675894	3676748	-
spdH	PA3713	spermidine dehydrogenase, SpdH	-1.56	4158143	4160005	+
moaA1	PA3870	molybdenum cofactor biosynthesis protein A	-1.56	4333357	4334346	-
PA4361	PA4361	oxidoreductase	-1.56	4889112	4890101	-
icmP	PA4370	Insulin-cleaving metalloproteinase outer membrane protein	-1.56	4898193	4899533	+
PA4383	PA4383	camphor resistance protein CrcB	-1.56	4914127	4914510	-
lpxO1	PA4512	lipopolysaccharide biosynthetic protein LpxO1	-1.56	5049769	5050668	+
PA4879	PA4879	hypothetical protein	-1.56	5474580	5476649	-
PA0285	PA0285	hypothetical protein	-1.57	318312	320594	-
pta	PA0835	phosphate acetyltransferase	-1.57	909418	911532	-
pvdL	PA2424	peptide synthase	-1.57	2707666	2720694	-
phzS	PA4217	hypothetical protein	-1.57	4720301	4721509	+
PA4290	PA4290	chemotaxis transducer	-1.57	4812598	4814214	-
PA4445	PA4445	hypothetical protein	-1.57	4978959	4979717	-
PA4504	PA4504	ABC transporter permease	-1.57	5043090	5044001	+
PA4836	PA4836	hypothetical protein	-1.57	5426895	5427686	-
exoT	PA0044	exoenzyme T	-1.58	58786	60159	+
pscF	PA1719	type III export protein PscF	-1.58	1862764	1863021	+
nirB	PA1781	assimilatory nitrite reductase large subunit	-1.58	1926176	1928626	-
PA2698	PA2698	hydrolase	-1.58	3050669	3051349	-
PA3020	PA3020	lytic transglycosylase	-1.58	3381963	3383891	+
oprP	PA3279	phosphate-specific outer membrane porin OprP precursor	-1.58	3671227	3672549	-
PA3661	PA3661	hypothetical protein	-1.58	4102087	4102446	+
PA0495	PA0495	hypothetical protein	-1.59	554383	555261	+
PA0725	PA0725	hypothetical protein	-1.59	792637	792993	+
PA1137	PA1137	oxidoreductase	-1.59	1228212	1229198	-
fliN	PA1444	flagellar motor switch protein	-1.59	1573551	1574024	+
PA1464	PA1464	purine-binding chemotaxis protein	-1.59	1594087	1594566	+
PA2076	PA2076	transcriptional regulator	-1.59	2282480	2283382	+
PA2762	PA2762	hypothetical protein	-1.59	3121921	3122265	-
PA4502	PA4502	ABC transporter	-1.59	5040405	5042000	+
phuT	PA4708	Heme-transporter, PhuT	-1.59	5287069	5287962	-
pobA	PA0247	4-hydroxybenzoate 3-monooxygenase	-1.6	279574	280758	-
popB	PA1708	translocator protein PopB	-1.6	1853665	1854837	+
PA2340	PA2340	binding-protein-dependent maltose/mannitol transport protein	-1.6	2584426	2585259	+
PA2523	PA2523	two-component response regulator	-1.6	2843818	2844492	+
asd	PA3117	aspartate-semialdehyde dehydrogenase	-1.6	3499486	3500598	-
oprO	PA3280	Pyrophosphate-specific outer membrane porin OprO precursor	-1.6	3673008	3674324	-
PA4142	PA4142	secretion protein	-1.6	4632873	4634129	+
PA4194	PA4194	ABC transporter permease	-1.6	4691343	4692041	-
ppk	PA5242	polyphosphate kinase	-1.6	5902386	5904596	-
PA1655	PA1655	glutathione S-transferase	-1.61	1801851	1802453	+
fpvR	PA2388	protein FpvR	-1.61	2641035	2642030	+
PA2418	PA2418	hypothetical protein	-1.61	2701206	2702066	+
hisJ	PA2923	periplasmic histidine-binding protein HisJ	-1.61	3278638	3279423	+
PA3024	PA3024	carbohydrate kinase	-1.61	3386270	3387829	-
lspA	PA4559	lipoprotein signal peptidase	-1.61	5106449	5106958	-
PA4929	PA4929	hypothetical protein	-1.61	5530973	5533015	+
hisH1	PA5142	imidazole glycerol phosphate synthase subunit HisH	-1.61	5790445	5791086	-
PA0497	PA0497	hypothetical protein	-1.62	556275	557276	-
prpB	PA0796	2-methylisocitrate lyase	-1.62	874206	875102	-
fliJ	PA1105	flagellar biosynthesis chaperone	-1.62	1197390	1197833	+
femA	PA1910	ferric-mycobactin receptor, FemA	-1.62	2081853	2084267	-
nqrD	PA2996	Na(+)-translocating NADH-quinone reductase subunit D	-1.62	3353498	3354172	-
PA3436	PA3436	hypothetical protein	-1.62	3844385	3844942	+
PA4558	PA4558	peptidyl-prolyl cis-trans isomerase, FkbP-type	-1.62	5106016	5106456	-
PA5404	PA5404	hypothetical protein	-1.62	6083105	6083509	+
opmQ	PA2391	hypothetical protein	-1.63	2645303	2646727	+
PA3181	PA3181	keto-hydroxyglutarate-aldolase/keto-deoxy-phosphogluconate aldolase	-1.63	3570941	3571603	-
edd	PA3194	phosphogluconate dehydratase	-1.63	3585477	3587303	-
PA3383	PA3383	phosphonate ABC transporter substrate-binding protein	-1.63	3789093	3790097	-
rhlI	PA3476	autoinducer synthesis protein RhlI	-1.63	3889139	3889744	-
narI	PA3872	respiratory nitrate reductase subunit gamma	-1.63	4335276	4335959	-
roxR	PA4493	RoxR	-1.63	5028394	5028954	-
PA4837	PA4837	hypothetical protein	-1.63	5427716	5429842	-
PA0391	PA0391	hypothetical protein	-1.64	431858	433825	-
PA1761	PA1761	hypothetical protein	-1.64	1904479	1904916	+
fpvI	PA2387	RNA polymerase sigma factor	-1.64	2640392	2640871	-
PA4030	PA4030	hypothetical protein	-1.64	4511639	4512469	+
PA4107	PA4107	hypothetical protein	-1.64	4590396	4590863	-
phzM	PA4209	phenazine-specific methyltransferase	-1.64	4712095	4713099	-
PA4981	PA4981	amino acid permease	-1.64	5593683	5595095	-
PA5097	PA5097	amino acid permease	-1.64	5738432	5739835	-
PA0326	PA0326	ABC transporter ATP-binding protein	-1.65	366080	367129	-
PA2409	PA2409	ABC transporter permease	-1.65	2691862	2692767	+
pvdS	PA2426	extracytoplasmic-function sigma-70 factor	-1.65	2722175	2722738	+
PA4140	PA4140	hypothetical protein	-1.65	4630375	4632168	+
PA5422	PA5422	hypothetical protein	-1.65	6103167	6104123	+
PA0793	PA0793	hypothetical protein	-1.66	868943	870130	-
PA2873	PA2873	hypothetical protein	-1.66	3225381	3227387	-
PA4294	PA4294	hypothetical protein	-1.66	4819358	4819864	-
PA1662	PA1662	ClpA/B-type protease	-1.67	1810751	1813384	+
PA2654	PA2654	chemotaxis transducer	-1.67	3003457	3005601	+
PA2875	PA2875	hypothetical protein	-1.67	3228337	3229254	-
nosZ	PA3392	nitrous-oxide reductase	-1.67	3797009	3798919	+
nalC	PA3721	NalC	-1.67	4166518	4167159	+
aqpZ	PA4034	aquaporin Z	-1.67	4514695	4515384	+
PA4431	PA4431	iron-sulfur protein	-1.67	4964266	4964859	-
PA4978	PA4978	hypothetical protein	-1.67	5589295	5591385	-
hutC	PA5105	histidine utilization repressor HutC	-1.67	5748600	5749352	-
soxD	PA5417	sarcosine oxidase subunit delta	-1.67	6096707	6097027	+
prpC	PA0795	methylcitrate synthase	-1.68	872986	874113	-
PA1909	PA1909	hypothetical protein	-1.68	2080661	2081812	-
PA2205	PA2205	hypothetical protein	-1.68	2423924	2424400	-
PA2458	PA2458	hypothetical protein	-1.68	2758061	2759182	+
PA1107	PA1107	hypothetical protein	-1.69	1198750	1199946	-
PA2168	PA2168	hypothetical protein	-1.69	2392043	2392819	+
PA2554	PA2554	short-chain dehydrogenase	-1.69	2886570	2887337	-
nqrB	PA2998	Na(+)-translocating NADH-quinone reductase subunit B	-1.69	3354947	3356158	-
cupB2	PA4085	chaperone CupB2	-1.69	4568277	4569023	-
amiB	PA4947	N-acetylmuramoyl-L-alanine amidase	-1.69	5551681	5553108	-
pilQ	PA5040	type 4 fimbrial biogenesis outer membrane protein PilQ precursor	-1.69	5675714	5677858	-
PA0691	PA0691	hypothetical protein	-1.7	762891	763493	+
ackA	PA0836	acetate kinase	-1.7	911595	912779	-
exsD	PA1714	ExsD	-1.7	1858207	1859037	+
PA2407	PA2407	adhesion protein	-1.7	2690160	2691113	+
PA2955	PA2955	hypothetical protein	-1.7	3315057	3315689	-
PA3435	PA3435	flavodoxin	-1.7	3843653	3844105	-
lnt	PA3984	apolipoprotein N-acyltransferase	-1.7	4463904	4465439	+
fppA	PA4295	Flp prepilin peptidase A, FppA	-1.7	4819928	4820410	+
pcrH	PA1707	regulatory protein PcrH	-1.71	1853181	1853684	+
pscE	PA1718	type III export protein PscE	-1.71	1862558	1862761	+
PA2310	PA2310	hypothetical protein	-1.71	2548571	2549458	-
PA2460	PA2460	hypothetical protein	-1.71	2760323	2760619	-
PA2674	PA2674	type II secretion system protein	-1.71	3020929	3021339	-
ribC	PA4055	riboflavin synthase subunit alpha	-1.71	4535834	4536493	-
PA4692	PA4692	sulfite oxidase subunit YedY	-1.71	5270411	5271424	-
PA4979	PA4979	acyl-CoA dehydrogenase	-1.71	5591452	5592612	-
PA5084	PA5084	oxidoreductase	-1.71	5722267	5723517	-
hisF1	PA5140	imidazole glycerol phosphate synthase subunit HisF	-1.71	5788614	5789384	-
PA0708	PA0708	transcriptional regulator	-1.72	781259	782113	-
PA0986	PA0986	hypothetical protein	-1.72	1068193	1068456	+
PA2027	PA2027	hypothetical protein	-1.72	2219253	2219645	-
PA2936	PA2936	hypothetical protein	-1.72	3291283	3291864	+
lasB	PA3724	elastase LasB	-1.72	4168987	4170483	-
fecA	PA3901	Fe(III) dicitrate transporter FecA	-1.72	4368837	4371191	+
PA3905	PA3905	hypothetical protein	-1.72	4374330	4374857	+
PA4172	PA4172	nuclease	-1.72	4668490	4669290	+
PA5099	PA5099	transporter	-1.72	5741524	5742966	-
hisA	PA5141	1-(5-phosphoribosyl)-5-[(5-phosphoribosylamino)methylideneamino] imidazole-4-carboxamide isomerase	-1.72	5789395	5790132	-
PA0039	PA0039	hypothetical protein	-1.73	40589	40816	+
PA0193	PA0193	hypothetical protein	-1.73	221585	222487	+
PA1103	PA1103	flagellar assembly protein H	-1.73	1195225	1196031	+
PA2204	PA2204	ABC transporter	-1.73	2422819	2423625	-
PA2652	PA2652	chemotaxis transducer	-1.73	3000074	3001759	-
nqrF	PA2994	Na(+)-translocating NADH-quinone reductase subunit F	-1.73	3351656	3352879	-
PA3231	PA3231	hypothetical protein	-1.73	3618726	3618884	-
PA4667	PA4667	hypothetical protein	-1.73	5234997	5236769	+
PA5396	PA5396	hypothetical protein	-1.73	6074230	6075207	+
PA5482	PA5482	hypothetical protein	-1.73	6172712	6172873	-
PA0692	PA0692	hypothetical protein	-1.74	763657	765291	+
antA	PA2512	anthranilate dioxygenase large subunit	-1.74	2829440	2830834	+
PA3871	PA3871	peptidyl-prolyl cis-trans isomerase, PpiC-type	-1.74	4334403	4335221	-
acsA	PA0887	acetyl-CoA synthetase	-1.75	969670	971625	+
PA1093	PA1093	hypothetical protein	-1.75	1184603	1184974	+
PA2670	PA2670	hypothetical protein	-1.75	3017818	3018804	-
PA3311	PA3311	hypothetical protein	-1.75	3712560	3714911	+
PA3412	PA3412	hypothetical protein	-1.75	3819527	3819796	-
PA3906	PA3906	hypothetical protein	-1.75	4374850	4375233	+
PA4913	PA4913	ABC transporter	-1.75	5511988	5513112	-
pvdH	PA2413	diaminobutyrate--2-oxoglutarate aminotransferase	-1.76	2694842	2696251	-
PA0145	PA0145	hypothetical protein	-1.77	165219	165737	-
idh	PA2624	isocitrate dehydrogenase	-1.77	2967161	2969386	+
PA3021	PA3021	hypothetical protein	-1.77	3383948	3384334	+
PA3502	PA3502	hypothetical protein	-1.77	3918471	3918788	-
PA3888	PA3888	ABC transporter permease	-1.77	4354544	4355266	+
mutL	PA4946	DNA mismatch repair protein	-1.77	5549780	5551681	-
estA	PA5112	esterase	-1.77	5754298	5756238	-
PA0007	PA0007	hypothetical protein	-1.78	8671	10377	+
pscG	PA1720	type III export protein PscG	-1.78	1863024	1863371	+
PA1954	PA1954	hypothetical protein	-1.78	2139354	2140376	-
PA2402	PA2402	peptide synthase	-1.78	2671729	2687178	-
PA3907	PA3907	hypothetical protein	-1.78	4375230	4376015	+
PA4029	PA4029	hypothetical protein	-1.78	4510971	4511636	+
pilM	PA5044	type 4 fimbrial biogenesis protein PilM	-1.78	5679649	5680713	-
PA1048	PA1048	hypothetical protein	-1.79	1135408	1136289	+
PA1149	PA1149	hypothetical protein	-1.79	1242750	1243118	-
aprF	PA1248	alkaline protease secretion outer membrane protein AprF precursor	-1.79	1353827	1355272	+
aer	PA1561	aerotaxis receptor Aer	-1.79	1698382	1699947	-
pscC	PA1716	type III secretion outer membrane protein PscC precursor	-1.79	1859493	1861295	+
PA2405	PA2405	hypothetical protein	-1.79	2689241	2689570	+
lipA	PA2862	lactonizing lipase	-1.79	3214282	3215217	+
PA5445	PA5445	coenzyme A transferase	-1.79	6133838	6135331	+
PA0174	PA0174	hypothetical protein	-1.8	198080	198682	-
nqrC	PA2997	Na(+)-translocating NADH-quinone reductase subunit C	-1.8	3354169	3354954	-
PA1336	PA1336	two-component sensor	-1.81	1448548	1450449	-
PA2406	PA2406	hypothetical protein	-1.81	2689567	2690127	+
nqrE	PA2995	Na(+)-translocating NADH-quinone reductase subunit E	-1.81	3352890	3353498	-
pilO	PA5042	type 4 fimbrial biogenesis protein PilO	-1.81	5678433	5679056	-
PA5383	PA5383	hypothetical protein	-1.81	6061341	6062408	+
PA0542	PA0542	hypothetical protein	-1.82	599757	600176	-
PA3045	PA3045	two-component response regulator	-1.82	3408560	3409183	-
PA3236	PA3236	glycine betaine-binding protein	-1.83	3623686	3624543	-
flhA	PA1452	flagellar biosynthesis protein FlhA	-1.84	1580321	1582444	+
PA2662	PA2662	hypothetical protein	-1.84	3011100	3012293	-
PA0248	PA0248	transcriptional regulator	-1.85	280936	281802	+
PA0976	PA0976	hypothetical protein	-1.85	1059622	1060296	+
PA0471	PA0471	transmembrane sensor	-1.86	532541	533512	-
PA1144	PA1144	major facilitator superfamily (MFS) transporter	-1.86	1234816	1236150	-
PA1335	PA1335	two-component response regulator	-1.86	1447226	1448503	-
PA3080	PA3080	hypothetical protein	-1.86	3455266	3456363	-
PA5397	PA5397	hypothetical protein	-1.86	6075334	6075864	+
PA1039	PA1039	hypothetical protein	-1.87	1125865	1126338	-
PA1697	PA1697	type III secretion system ATPase	-1.87	1845714	1847036	-
gbt	PA3082	glycine betaine transmethylase	-1.87	3457969	3459933	-
PA3400	PA3400	hypothetical protein	-1.87	3804940	3806073	-
glyA3	PA4602	serine hydroxymethyltransferase	-1.87	5160738	5161991	+
pilN	PA5043	type 4 fimbrial biogenesis protein PilN	-1.87	5679053	5679649	-
PA0920	PA0920	hypothetical protein	-1.88	1003966	1006611	-
PA2548	PA2548	hypothetical protein	-1.88	2878976	2880370	+
PA2894	PA2894	hypothetical protein	-1.88	3249209	3249631	-
PA3341	PA3341	transcriptional regulator	-1.88	3752044	3752478	-
PA0127	PA0127	hypothetical protein	-1.89	144969	145469	+
popN	PA1698	type III secretion outer membrane protein PopN precursor	-1.89	1847227	1848093	+
PA2282	PA2282	hypothetical protein	-1.89	2510622	2511050	+
PA5082	PA5082	ABC transporter	-1.89	5720950	5721849	-
pcaK	PA0235	4-hydroxybenzoate transporter PcaK	-1.9	264964	266310	-
fliG	PA1102	flagellar motor switch protein G	-1.9	1194207	1195223	+
PA3079	PA3079	hypothetical protein	-1.9	3452872	3455253	-
phzB1	PA4211	phenazine biosynthesis protein	-1.9	4714314	4714802	+
opdP	PA4501	glycine-glutamate dipeptide porin OpdP	-1.9	5038901	5040355	+
PA0020	PA0020	hypothetical protein	-1.91	21712	22737	+
fliI	PA1104	flagellum-specific ATP synthase	-1.91	1196021	1197376	+
aprE	PA1247	alkaline protease secretion protein AprE	-1.91	1352525	1353823	+
pvdP	PA2392	protein PvdP	-1.91	2646776	2648410	-
PA1348	PA1348	hypothetical protein	-1.92	1462696	1463403	+
PA2036	PA2036	hypothetical protein	-1.92	2226879	2227400	+
PA4429	PA4429	cytochrome C1 precursor	-1.92	4962273	4963055	-
PA3025	PA3025	FAD-dependent glycerol-3-phosphate dehydrogenase	-1.93	3387850	3389430	-
PA3921	PA3921	transcriptional regulator	-1.93	4391641	4394361	-
soxB	PA5416	sarcosine oxidase subunit beta	-1.93	6095363	6096613	+
PA5530	PA5530	MFS dicarboxylate transporter	-1.93	6223174	6224481	+
pcrV	PA1706	type III secretion protein PcrV	-1.94	1852288	1853172	+
PA3026	PA3026	hypothetical protein	-1.94	3389436	3391031	-
PA0175	PA0175	chemotaxis protein methyltransferase	-1.96	198688	199530	-
PA5196	PA5196	hypothetical protein	-1.96	5848577	5849011	+
glyA1	PA5415	serine hydroxymethyltransferase	-1.96	6094024	6095277	+
PA0169	PA0169	hypothetical protein	-1.97	192965	193672	-
PA0378	PA0378	monofunctional biosynthetic peptidoglycan transglycosylase	-1.97	422212	422943	-
ppyR	PA2663	psl and pyoverdine operon regulator, PpyR	-1.97	3012280	3012537	-
betB	PA5373	betaine aldehyde dehydrogenase	-1.97	6049185	6050657	-
PA2408	PA2408	ABC transporter ATP-binding protein	-1.98	2691110	2691865	+
PA3526	PA3526	hypothetical protein	-1.98	3945997	3946962	-
PA4639	PA4639	hypothetical protein	-1.98	5207035	5207622	-
rimK	PA5197	ribosomal protein S6 modification protein	-1.98	5849143	5850048	+
pvdQ	PA2385	3-oxo-C12-homoserine lactone acylase PvdQ	-1.99	2636517	2638805	-
PA4668	PA4668	molecular chaperone LolB	-1.99	5236774	5237391	+
gloA2	PA0710	lactoylglutathione lyase	-2	782570	782965	+
cupC2	PA0993	chaperone CupC2	-2	1073960	1074673	+
PA1738	PA1738	transcriptional regulator	-2	1882595	1883509	-
ptxS	PA2259	transcriptional regulator PtxS	-2	2487856	2488878	+
PA3890	PA3890	ABC transporter permease	-2	4356201	4356863	+
PA1168	PA1168	hypothetical protein	-2.01	1267282	1267602	+
fpvA	PA2398	ferripyoverdine receptor	-2.01	2655187	2657634	+
PA2404	PA2404	hypothetical protein	-2.01	2688705	2689244	+
PA3350	PA3350	flagellar basal body P-ring biosynthesis protein FlgA	-2.01	3761961	3762659	+
rhlB	PA3478	rhamnosyltransferase chain B	-2.01	3890775	3892055	-
PA0719	PA0719	hypothetical protein	-2.02	789654	790031	+
PA1663	PA1663	transcriptional regulator	-2.02	1813395	1814906	+
PA3348	PA3348	chemotaxis protein methyltransferase	-2.02	3759996	3760820	-
PA4438	PA4438	hypothetical protein	-2.02	4970797	4971891	-
hemO	PA0672	heme oxygenase	-2.03	732959	733555	+
PA2410	PA2410	hypothetical protein	-2.03	2692764	2693681	+
rhlA	PA3479	rhamnosyltransferase chain A	-2.03	3892121	3893008	-
PA4500	PA4500	ABC transporter	-2.03	5037074	5038675	+
pilP	PA5041	type 4 fimbrial biogenesis protein PilP	-2.03	5677912	5678436	-
PA1668	PA1668	hypothetical protein	-2.04	1818189	1819058	+
PA3232	PA3232	DNA polymerase III subunit epsilon	-2.04	3618993	3619619	-
PA3908	PA3908	hypothetical protein	-2.04	4376012	4376731	+
betA	PA5372	choline dehydrogenase	-2.04	6047364	6049049	-
betT1	PA5375	choline transporter BetT	-2.04	6051644	6053194	+
cttP	PA0180	chemotactic transducer for trichloroethylene [positive chemotaxis], CttP	-2.05	204657	205829	-
aprD	PA1246	alkaline protease secretion protein AprD	-2.05	1350747	1352528	+
PA1127	PA1127	oxidoreductase	-2.06	1219621	1220610	-
PA2459	PA2459	hypothetical protein	-2.06	2759482	2760087	-
PA1545	PA1545	hypothetical protein	-2.07	1682051	1682518	+
exsE	PA1711	ExsE	-2.07	1856308	1856553	+
PA1939	PA1939	hypothetical protein	-2.07	2120225	2122222	-
PA4911	PA4911	branched-chain amino acid ABC transporter permease	-2.07	5509551	5510828	-
hutH	PA5098	histidine ammonia-lyase	-2.07	5739898	5741427	-
gshB	PA0407	glutathione synthetase	-2.08	448431	449384	-
PA1870	PA1870	hypothetical protein	-2.09	2031988	2032413	+
PA3019	PA3019	ABC transporter ATP-binding protein	-2.09	3379815	3381737	-
pctA	PA4309	chemotactic transducer PctA	-2.09	4835264	4837153	+
PA4980	PA4980	enoyl-CoA hydratase	-2.09	5592633	5593424	-
PA0040	PA0040	hypothetical protein	-2.1	41113	42801	+
fliD	PA1094	flagellar capping protein FliD	-2.1	1185060	1186484	+
PA4430	PA4430	cytochrome b	-2.1	4963055	4964266	-
PA4540	PA4540	hypothetical protein	-2.11	5080757	5082394	+
PA1245	PA1245	hypothetical protein	-2.12	1349416	1350660	+
PA1888	PA1888	hypothetical protein	-2.13	2057930	2059339	-
PA4633	PA4633	chemotaxis transducer	-2.13	5200487	5202625	+
PA4880	PA4880	bacterioferritin	-2.13	5476945	5477478	+
betI	PA5374	BetI family transcriptional regulator	-2.13	6050718	6051311	-
PA1260	PA1260	amino acid ABC transporter substrate-binding protein	-2.15	1368339	1369160	-
pcrG	PA1705	regulator in type III secretion	-2.15	1851982	1852278	+
PA2384	PA2384	hypothetical protein	-2.15	2636013	2636336	-
ygbB	PA3627	2-C-methyl-D-erythritol 2,4-cyclodiphosphate synthase	-2.15	4062426	4062899	-
PA0714	PA0714	hypothetical protein	-2.16	784698	785174	+
PA1666	PA1666	hypothetical protein	-2.16	1816352	1816858	+
mucR	PA1727	MucR	-2.16	1868706	1870763	-
PA3081	PA3081	hypothetical protein	-2.16	3456543	3457910	-
PA1096	PA1096	hypothetical protein	-2.18	1187009	1187305	+
PA1679	PA1679	hypothetical protein	-2.18	1828931	1829710	-
rhl	PA3861	ATP-dependent RNA helicase RhlB	-2.18	4321434	4322627	+
PA3346	PA3346	two-component response regulator	-2.19	3757659	3759374	-
PA3568	PA3568	acetyl-coa synthetase	-2.19	3999208	4001094	-
PA0787	PA0787	hypothetical protein	-2.2	859007	860170	+
pctB	PA4310	chemotactic transducer PctB	-2.2	4837390	4839279	+
femR	PA1911	sigma factor regulator, FemR	-2.21	2084476	2085426	-
PA0043	PA0043	hypothetical protein	-2.22	57212	58594	-
PA4326	PA4326	hypothetical protein	-2.22	4854595	4854978	-
PA3912	PA3912	hypothetical protein	-2.23	4382010	4382900	-
PA3913	PA3913	protease	-2.23	4382912	4383907	-
PA0718	PA0718	hypothetical protein	-2.24	789360	789650	+
cupA1	PA2128	fimbrial subunit CupA1	-2.24	2342493	2343044	+
PA3720	PA3720	hypothetical protein	-2.24	4165888	4166313	-
PA3340	PA3340	hypothetical protein	-2.25	3749719	3751767	-
PA1665	PA1665	hypothetical protein	-2.28	1815153	1816346	+
PA3402	PA3402	hypothetical protein	-2.28	3807246	3808217	-
rmlA	PA5163	glucose-1-phosphate thymidylyltransferase	-2.28	5812241	5813122	+
PA0712	PA0712	hypothetical protein	-2.29	783576	783833	-
PA1134	PA1134	hypothetical protein	-2.29	1225757	1226278	-
phzA1	PA4210	phenazine biosynthesis protein	-2.29	4713796	4714284	+
PA4331	PA4331	hypothetical protein	-2.29	4859329	4860255	-
rmlC	PA5164	dTDP-4-dehydrorhamnose 3,5-epimerase	-2.29	5813122	5813667	+
PA5106	PA5106	N-formimino-L-glutamate deiminase	-2.33	5749453	5750814	+
PA3889	PA3889	ABC transporter	-2.34	4355266	4356201	+
fliE	PA1100	flagellar hook-basal body protein FliE	-2.35	1192053	1192382	+
flgL	PA1087	flagellar hook-associated protein FlgL	-2.37	1174240	1175559	+
PA3924	PA3924	long-chain-fatty-acid--CoA ligase	-2.37	4398259	4399941	-
fliF	PA1101	flagellar MS-ring protein	-2.38	1192405	1194201	+
PA2868	PA2868	hypothetical protein	-2.38	3221206	3221565	+
PA2412	PA2412	hypothetical protein	-2.39	2694546	2694764	-
PA2393	PA2393	dipeptidase	-2.4	2648626	2649972	+
PA4026	PA4026	acetyltransferase	-2.4	4507897	4508358	+
PA3401	PA3401	hypothetical protein	-2.41	3806070	3807242	-
pprB	PA4296	two-component response regulator, PprB	-2.41	4820532	4821359	+
rmlD	PA5162	dTDP-4-dehydrorhamnose reductase	-2.41	5811336	5812244	+
rmlB	PA5161	dTDP-D-glucose 4,6-dehydratase	-2.42	5810281	5811339	+
PA3891	PA3891	ABC transporter ATP-binding protein	-2.43	4356876	4358039	+
opdC	PA0162	histidine porin OpdC	-2.44	184594	185928	+
fgtA	PA1091	flagellar glycosyl transferase, FgtA	-2.45	1177613	1182697	+
PA4139	PA4139	hypothetical protein	-2.46	4629944	4630243	+
PA1347	PA1347	transcriptional regulator	-2.47	1461938	1462630	-
PA3440	PA3440	hypothetical protein	-2.47	3846837	3847148	+
PA1095	PA1095	flagellar protein FliS	-2.49	1186606	1186986	+
norB	PA0524	nitric-oxide reductase subunit B	-2.5	582455	583855	+
fleR	PA1099	two-component response regulator	-2.5	1190385	1191806	+
PA1660	PA1660	hypothetical protein	-2.5	1808193	1809773	+
PA2567	PA2567	hypothetical protein	-2.5	2902218	2903981	+
PA1914	PA1914	hypothetical protein	-2.53	2086808	2088034	-
PA2544	PA2544	hypothetical protein	-2.53	2875697	2876410	-
Arg_tRNA	PA3368.1	Arg tRNA	-2.53	3778654	3778730	-
PA1090	PA1090	hypothetical protein	-2.54	1176958	1177620	+
pchR	PA4227	transcriptional regulator PchR	-2.54	4741305	4742195	-
PA1088	PA1088	hypothetical protein	-2.56	1175614	1176375	+
PA4332	PA4332	hypothetical protein	-2.57	4860248	4861711	-
PA0122	PA0122	hypothetical protein	-2.58	141917	142327	+
PA0472	PA0472	RNA polymerase sigma factor	-2.61	533509	534027	-
cyaB	PA3217	protein CyaB	-2.61	3605684	3607075	+
PA4520	PA4520	chemotaxis transducer	-2.61	5061730	5063751	-
fliC	PA1092	flagellin type B	-2.63	1183058	1184524	+
flgC	PA1078	flagellar basal body rod protein FlgC	-2.65	1164688	1165128	+
exsB	PA1712	exoenzyme S synthesis protein B	-2.66	1856562	1856975	+
PA1967	PA1967	hypothetical protein	-2.67	2149864	2150364	-
PA3911	PA3911	hypothetical protein	-2.67	4381501	4382016	-
PA4739	PA4739	hypothetical protein	-2.68	5322757	5323101	-
aer2	PA0176	aerotaxis transducer Aer2	-2.7	199600	201639	-
ansB	PA1337	glutaminase-asparaginase	-2.7	1450545	1451633	-
PA1658	PA1658	hypothetical protein	-2.7	1805753	1807228	+
PA0047	PA0047	hypothetical protein	-2.71	61879	62388	+
aprA	PA1249	alkaline metalloproteinase	-2.71	1355631	1357070	+
fleS	PA1098	two-component sensor	-2.72	1189172	1190380	+
PA0494	PA0494	acetyl-CoA carboxylase biotin carboxylase subunit	-2.73	553005	554381	+
PA3353	PA3353	hypothetical protein	-2.73	3763681	3764472	+
mmsA	PA3570	methylmalonate-semialdehyde dehydrogenase	-2.73	4002108	4003601	-
exsA	PA1713	transcriptional regulator ExsA	-2.74	1857273	1858109	+
mmsB	PA3569	3-hydroxyisobutyrate dehydrogenase	-2.75	4001196	4002092	-
PA4033	PA4033	hypothetical protein	-2.75	4514079	4514348	+
PA0717	PA0717	hypothetical protein	-2.76	789144	789356	+
mltB1	PA4444	murein hydrolase B	-2.76	4977869	4978972	+
PA4738	PA4738	hypothetical protein	-2.82	5322510	5322707	-
hutU	PA5100	urocanate hydratase	-2.82	5743074	5744753	-
flgD	PA1079	flagellar basal body rod modification protein	-2.85	1165141	1165854	+
PA1664	PA1664	hypothetical protein	-2.86	1814995	1815135	+
PA3922	PA3922	hypothetical protein	-2.87	4394694	4396061	-
PA1331	PA1331	hypothetical protein	-2.88	1442904	1444451	-
rhlR	PA3477	transcriptional regulator RhlR	-2.88	3889925	3890650	-
PA3413	PA3413	hypothetical protein	-2.9	3820006	3820272	+
PA3951	PA3951	hypothetical protein	-2.91	4432026	4432529	-
PA3233	PA3233	hypothetical protein	-2.92	3619616	3621415	-
PA1661	PA1661	hypothetical protein	-2.94	1809737	1810744	+
pvdA	PA2386	L-ornithine N5-oxygenase	-2.94	2638928	2640259	-
PA1089	PA1089	hypothetical protein	-2.96	1176380	1176982	+
PA2450	PA2450	hypothetical protein	-2.99	2751745	2752662	-
PA1340	PA1340	amino acid ABC transporter membrane protein	-3.01	1454201	1454869	-
PA3367	PA3367	hypothetical protein	-3.02	3778266	3778604	+
PA4219	PA4219	hypothetical protein	-3.05	4722851	4724035	-
PA4220	PA4220	hypothetical protein	-3.05	4724358	4724639	-
PA5195	PA5195	heat shock protein	-3.06	5847972	5848367	-
PA3347	PA3347	hypothetical protein	-3.1	3759376	3759681	-
PA4844	PA4844	chemotaxis transducer	-3.1	5437785	5439758	+
cysH	PA1756	phosphoadenosine phosphosulfate reductase	-3.11	1895692	1896495	-
flgE	PA1080	flagellar hook protein FlgE	-3.12	1165882	1167270	+
PA3923	PA3923	hypothetical protein	-3.12	4396122	4398047	-
flgB	PA1077	flagellar basal-body rod protein FlgB	-3.16	1164275	1164682	+
flp	PA4306	type IVb pilin, Flp	-3.17	4830964	4831182	+
PA2788	PA2788	chemotaxis transducer	-3.2	3144412	3146007	-
PA2411	PA2411	thioesterase	-3.22	2693781	2694545	-
flgK	PA1086	flagellar hook-associated protein FlgK	-3.24	1172163	1174214	+
PA5137	PA5137	hypothetical protein	-3.31	5785948	5786703	-
PA4368	PA4368	hypothetical protein	-3.32	4896523	4897425	-
PA4683	PA4683	hypothetical protein	-3.32	5251871	5252473	-
PA0177	PA0177	purine-binding chemotaxis protein	-3.34	201675	202160	-
exsC	PA1710	exoenzyme S synthesis protein C	-3.38	1855862	1856299	+
PA0161	PA0161	hypothetical protein	-3.44	184287	184439	+
PA1339	PA1339	amino acid ABC transporter ATP binding protein	-3.44	1453470	1454204	-
PA3349	PA3349	chemotaxis protein	-3.44	3760897	3761829	-
PA2820	PA2820	hypothetical protein	-3.46	3174131	3174904	+
pctC	PA4307	chemotactic transducer PctC	-3.47	4831372	4833270	+
PA1341	PA1341	amino acid ABC transporter membrane protein	-3.48	1454866	1455612	-
PA1441	PA1441	hypothetical protein	-3.54	1570496	1571779	+
PA4223	PA4223	ABC transporter ATP-binding protein	-3.54	4728614	4730326	-
flgI	PA1084	flagellar basal body P-ring biosynthesis protein FlgA	-3.65	1169822	1170931	+
PA0178	PA0178	two-component sensor	-3.69	202147	204066	-
PA1342	PA1342	ABC transporter	-3.72	1455815	1456723	-
PA2462	PA2462	hypothetical protein	-3.75	2761921	2778804	-
PA0921	PA0921	hypothetical protein	-3.82	1006860	1007219	+
PA0379	PA0379	hypothetical protein	-3.91	422980	423357	+
PA1659	PA1659	hypothetical protein	-3.91	1807241	1807648	+
ggt	PA1338	gamma-glutamyltranspeptidase	-3.99	1451719	1453392	-
PA1132	PA1132	hypothetical protein	-4.01	1224641	1225330	+
pchE	PA4226	dihydroaeruginoic acid synthetase	-4.02	4736795	4741111	-
PA1199	PA1199	lipoprotein	-4.04	1300258	1300791	+
flgJ	PA1085	flagellar rod assembly protein/muramidase FlgJ	-4.07	1170942	1172144	+
PA5169	PA5169	C4-dicarboxylate transporter	-4.11	5818831	5820114	+
PA1200	PA1200	hypothetical protein	-4.12	1300811	1301473	+
femI	PA1912	ECF sigma factor, FemI	-4.13	2085423	2085929	-
flgF	PA1081	flagellar basal body rod protein FlgF	-4.17	1167488	1168237	+
pchA	PA4231	salicylate biosynthesis isochorismate synthase	-4.17	4745121	4746551	+
flgG	PA1082	flagellar basal body rod protein FlgG	-4.25	1168284	1169069	+
pchD	PA4228	pyochelin biosynthesis protein PchD	-4.25	4742424	4744067	+
flgH	PA1083	flagellar basal body L-ring protein	-4.33	1169115	1169810	+
PA5364	PA5364	two-component response regulator	-4.36	6031366	6032268	-
PA1041	PA1041	hypothetical protein	-4.37	1126969	1127601	+
PA0938	PA0938	hypothetical protein	-4.43	1028172	1029500	+
morA	PA4601	motility regulator	-4.45	5156368	5160615	+
PA5168	PA5168	dicarboxylate transporter	-4.45	5818202	5818834	+
PA0493	PA0493	hypothetical protein	-4.54	552746	552994	+
PA1680	PA1680	hypothetical protein	-4.56	1829788	1830771	-
PA0170	PA0170	hypothetical protein	-4.6	193799	194179	-
Lys_tRNA	PA0976.1	Lys tRNA	-4.6	1060356	1060431	+
PA4324	PA4324	hypothetical protein	-4.75	4853650	4854009	-
PA0537	PA0537	hypothetical protein	-4.84	596274	596882	-
PA1941	PA1941	hypothetical protein	-4.87	2123897	2125792	-
PA1656	PA1656	hypothetical protein	-4.93	1803626	1805182	+
PA1728	PA1728	hypothetical protein	-5.01	1871116	1871457	+
PA0536	PA0536	hypothetical protein	-5.07	595245	596270	-
pchF	PA4225	pyochelin synthetase	-5.09	4731369	4736798	-
PA3722	PA3722	hypothetical protein	-5.11	4167172	4167522	-
PA0038	PA0038	hypothetical protein	-5.12	40190	40405	+
PA1657	PA1657	hypothetical protein	-5.31	1805218	1805724	+
fptA	PA4221	Fe(III)-pyochelin outer membrane receptor	-5.44	4724639	4726801	-
PA0045	PA0045	hypothetical protein	-5.59	60656	61342	+
PA4369	PA4369	hypothetical protein	-5.61	4897427	4897999	-
pchB	PA4230	isochorismate-pyruvate lyase	-5.9	4744819	4745124	+
PA5167	PA5167	c4-dicarboxylate-binding protein	-5.93	5817191	5818186	+
lptF	PA3692	Lipotoxon F, LptF	-6.36	4134591	4135376	+
PA0046	PA0046	hypothetical protein	-6.5	61373	61726	+
PA0172	PA0172	hypothetical protein	-6.59	194757	196748	-
PA3278	PA3278	hypothetical protein	-6.64	3670759	3671058	-
PA0179	PA0179	two-component response regulator	-7.05	204094	204459	-
pchG	PA4224	pyochelin biosynthetic protein PchG	-7.13	4730323	4731372	-
PA1940	PA1940	hypothetical protein	-7.3	2122579	2123718	-
PA4218	PA4218	transporter	-7.38	4721614	4722858	-
PA0492	PA0492	hypothetical protein	-7.42	551911	552669	+
PA3234	PA3234	acetate permease	-7.63	3621505	3623160	-
fleQ	PA1097	transcriptional regulator FleQ	-8.05	1187587	1189059	+
PA2463	PA2463	hypothetical protein	-8.23	2778917	2780614	-
pchC	PA4229	pyochelin biosynthetic protein PchC	-8.91	4744064	4744819	+
PA4677	PA4677	hypothetical protein	-8.96	5246185	5247423	-
PA4222	PA4222	ABC transporter ATP-binding protein	-9.09	4726893	4728617	-
PA3235	PA3235	hypothetical protein	-9.18	3623157	3623468	-
PA0171	PA0171	hypothetical protein	-9.82	194206	194748	-
PA5138	PA5138	hypothetical protein	-10.23	5786853	5787605	-
PA3691	PA3691	hypothetical protein	-11.66	4134138	4134542	+
PA3740	PA3740	hypothetical protein	-12.15	4193675	4194361	+
PA1913	PA1913	hypothetical protein	-13.51	2086021	2086701	-
PA2867	PA2867	chemotaxis transducer	-14.89	3219608	3221080	+
PA0505	PA0505	hypothetical protein	-16.16	564344	564574	+
PA3662	PA3662	hypothetical protein	-23.69	4102768	4103061	+
PA4843	PA4843	two-component response regulator	-40.27	5436079	5437707	+

## Sheet: RNA_ChIP cross reference
SYMBOL	PRODUCT	RNA-seq Fold Change	p-value	ChIP-seq fold enrichment	p-value	LOCUS	STRAND
PA0007	hypothetical protein	-1.78	5.90794e-06			PA0007	+
amrZ	alginate and motility regulator Z	483.31	0	4.8	0	PA3385	+
PA0020	hypothetical protein	-1.91	5.56782e-17			PA0020	+
PA1784	hypothetical protein-(40% homology to Klebsiella alginate lyase)	19.74	2.59256e-80	5.59	0	PA1784	-
PA2146	hypothetical protein-(92% homology to yciG from E.coli--swarming)	8.26	1.52369e-69	2.25	0	PA2146	+
PA0040	hypothetical protein	-2.1	8.22932e-05			PA0040	+
PA0041	hemagglutinin	-1.31	0.00105223			PA0041	+
PA0043	hypothetical protein	-2.22	1.47962e-11			PA0043	-
pelB	protein PelB	6.64	3.29991e-107	5.76	0	PA3063	-
PA0102	carbonic anhydrase	4.57	1.56314e-87	3.05	0	PA0102	+
PA0046	hypothetical protein	-6.5	4.12122e-77			PA0046	+
PA0047	hypothetical protein	-2.71	3.53714e-16			PA0047	+
PA0050	hypothetical protein	4.49	2.35928e-70			PA0050	+
PA0052	hypothetical protein	8.29	2.33985e-87			PA0052	-
PA0055	hypothetical protein	1.31	0.00303215			PA0055	-
prlC	oligopeptidase A	1.18	0.0419344			PA0067	+
PA0068	hypothetical protein	1.34	0.00878614			PA0068	+
algD	GDP-mannose 6-dehydrogenase AlgD	3.79	2.57578e-50	6.68	0	PA3540	+
PA0071	hypothetical protein	1.41	1.43966e-05			PA0071	-
PA0072	hypothetical protein	3.93	7.1748e-33			PA0072	-
PA0073	ABC transporter ATP-binding protein	4.44	1.81414e-38			PA0073	-
ppkA	serine/threonine protein kinase PpkA	3.61	2.12442e-61			PA0074	-
pppA	PppA	3.72	3.40821e-30			PA0075	-
PA0076	hypothetical protein	3.71	6.78537e-27			PA0076	-
icmF1	IcmF1	3.53	1.02557e-60			PA0077	-
PA0078	hypothetical protein	4.03	1.50457e-63			PA0078	-
PA0079	hypothetical protein	3.16	4.53735e-40			PA0079	-
PA0080	hypothetical protein	2.53	4.69242e-17			PA0080	-
fha1	Fha1	3.85	2.74958e-68			PA0081	-
PA1069	hypothetical protein	3.22	3.79009e-55	3.58	0	PA1069	+
PA0083	hypothetical protein	3.35	4.58248e-44			PA0083	+
PA0084	hypothetical protein	3.28	1.063e-57			PA0084	+
hcp1	hypothetical protein	3.88	4.82734e-73			PA0085	+
PA0086	hypothetical protein	2.98	4.67777e-31			PA0086	+
PA0087	hypothetical protein	2.62	1.8935e-21			PA0087	+
PA0088	hypothetical protein	3.47	2.08638e-49			PA0088	+
PA0089	hypothetical protein	3.72	7.20385e-16			PA0089	+
clpV1	ClpV1 protein	3.09	1.33304e-48			PA0090	+
vgrG1	VgrG1	3.2	2.75811e-49			PA0091	+
PA0092	hypothetical protein	1.5	0.00784776			PA0092	-
PA0094	hypothetical protein	1.24	0.0387795			PA0094	-
PA0095	hypothetical protein	1.43	1.01887e-05			PA0095	+
PA0098	3-oxoacyl-ACP synthase	1.7	0.00080473			PA0098	+
PA0099	hypothetical protein	1.61	0.000334327			PA0099	+
PA0101	hypothetical protein	1.91	1.33245e-08			PA0101	+
PA0082	hypothetical protein (TssA1 Type 6 secretion)	2.84	6.46321e-28	2.74	0	PA0082	+
PA0103	sulfate transporter	4.04	4.39985e-51			PA0103	+
PA0109	hypothetical protein	1.62	1.17747e-07			PA0109	-
PA0110	hypothetical protein	1.54	0.0386619			PA0110	+
PA0116	hypothetical protein	-1.27	0.035484			PA0116	+
PA0119	C4-dicarboxylate transporter DctA	-1.36	0.000933394			PA0119	+
PA0120	transcriptional regulator	-1.28	0.0222783			PA0120	+
PA0121	hypothetical protein	-1.5	0.000769602			PA0121	+
PA0122	hypothetical protein	-2.58	9.21752e-24			PA0122	+
PA0123	transcriptional regulator	-1.29	0.0499777			PA0123	-
PA0127	hypothetical protein	-1.89	1.92638e-05			PA0127	+
PA0138	ABC transporter permease	-1.32	0.0386619			PA0138	+
PA0145	hypothetical protein	-1.77	2.50552e-05			PA0145	-
PA0149	sigma-70 factor, ECF subfamily	1.46	0.0268353			PA0149	+
PA0150	transmembrane sensor	1.56	0.00975499			PA0150	+
pcaH	protocatechuate 3,4-dioxygenase subunit beta	-1.35	0.0188541			PA0153	+
PA0157	Resistance-Nodulation-cell Division (RND) efflux membrane fusion protein	1.33	0.00682222			PA0157	+
PA0158	Resistance-Nodulation-cell Division (RND) efflux transporter	1.23	0.0207544			PA0158	+
PA0161	hypothetical protein	-3.44	4.86757e-30			PA0161	+
opdC	histidine porin OpdC	-2.44	1.61813e-19			PA0162	+
PA0169	hypothetical protein	-1.97	3.6048e-10			PA0169	-
PA0170	hypothetical protein	-4.6	1.25366e-36			PA0170	-
PA0171	hypothetical protein	-9.82	1.54329e-29			PA0171	-
PA4625	hypothetical protein (CdrA)	2.84	6.41714e-42	7.94	0	PA4625	-
PA0174	hypothetical protein	-1.8	0.0291475			PA0174	-
PA0175	chemotaxis protein methyltransferase	-1.96	4.88052e-05			PA0175	-
aer2	aerotaxis transducer Aer2	-2.7	3.54589e-20			PA0176	-
PA0177	purine-binding chemotaxis protein	-3.34	2.69064e-05			PA0177	-
PA0178	two-component sensor	-3.69	1.37539e-18			PA0178	-
PA4625	hypothetical protein (CdrA)	2.84	6.41714e-42	4.24	0	PA4625	-
cttP	chemotactic transducer for trichloroethylene [positive chemotaxis], CttP	-2.05	6.25873e-13			PA0180	-
PA0181	transcriptional regulator	-1.39	0.0295687			PA0181	-
atsA	arylsulfatase	-1.36	0.0148939			PA0183	-
PA0191	transcriptional regulator	-1.38	0.020481			PA0191	-
PA0192	TonB-dependent receptor	-1.45	0.00256684			PA0192	+
PA0193	hypothetical protein	-1.73	0.00578739			PA0193	+
vreA	VreA	2.67	5.48137e-17	6.39	0	PA0674	+
exbB1	transporter ExbB	1.32	0.0214787			PA0198	+
PA0221	aminotransferase	-1.33	0.0428911			PA0221	+
PA0223	dihydrodipicolinate synthetase	1.23	0.0368781			PA0223	-
PA0226	CoA transferase, subunit A	-1.52	0.00624623			PA0226	+
pcaB	3-carboxy-cis,cis-muconate cycloisomerase	-1.29	0.0415914			PA0230	+
pcaK	4-hydroxybenzoate transporter PcaK	-1.9	3.65183e-05			PA0235	-
PA2685	hypothetical protein	1.91	1.34522e-17	3.59	0	PA2685	-
PA0248	transcriptional regulator	-1.85	1.35998e-07			PA0248	+
PA2174	hypothetical protein	1.86	5.73479e-07	2.34	0	PA2174	-
Ser_tRNA	Ser tRNA	1.85	3.45517e-16	2.09	0	PA0905.1	+
PA0253	transcriptional regulator	1.32	0.0380609			PA0253	-
PA0256	hypothetical protein	1.38	0.000116231			PA0256	-
PA0258	hypothetical protein	1.28	0.00259409			PA0258	-
PA4154	hypothetical protein	1.84	5.84489e-07	4.19	0	PA4154	-
gabD	succinate-semialdehyde dehydrogenase I	-1.24	0.0170382			PA0265	+
PA0285	hypothetical protein	-1.57	2.17043e-07			PA0285	-
oprE	Anaerobically-induced outer membrane porin OprE precursor	-1.5	1.7171e-07			PA0291	+
spuA	glutamine amidotransferase	1.31	0.000592032			PA0297	+
spuB	glutamine synthetase	1.22	0.0192219			PA0298	+
PA0319	hypothetical protein	1.34	0.00224832			PA0319	+
PA0321	acetylpolyamine aminohydrolase	-1.29	0.0380621			PA0321	-
PA0323	ABC transporter	-1.52	0.000423864			PA0323	-
PA0326	ABC transporter ATP-binding protein	-1.65	0.000595712			PA0326	-
PA1782	serine/threonine-protein kinase	1.8	0.00320808	5.45	0	PA1782	-
PA0332	hypothetical protein	1.49	0.0449498			PA0332	+
PA0333	hypothetical protein	1.3	0.0195337			PA0333	+
ampDh3	AmpDh3	1.77	3.68647e-07	4.36	0	PA0807	+
thyA	thymidylate synthase	-1.25	0.0175988			PA0342	+
PA0250	hypothetical protein	1.73	8.81891e-11	4.49	0	PA0250	-
pfpI	protease PfpI	-1.56	1.82923e-06			PA0355	-
PA0356	hypothetical protein	1.23	0.0333106			PA0356	+
mutM	formamidopyrimidine-DNA glycosylase	1.36	0.000780554			PA0357	+
PA0359	hypothetical protein	-1.42	0.0240469			PA0359	+
PA0361	gamma-glutamyltranspeptidase	1.32	0.00295214			PA0361	-
coaD	phosphopantetheine adenylyltransferase	1.47	1.78761e-05			PA0363	-
PA0366	aldehyde dehydrogenase	-1.3	0.0342329			PA0366	-
PA0378	monofunctional biosynthetic peptidoglycan transglycosylase	-1.97	2.13609e-08			PA0378	-
PA0379	hypothetical protein	-3.91	6.97475e-33			PA0379	+
PA0389	hypothetical protein	1.23	0.0376608			PA0389	-
metX	homoserine O-acetyltransferase	1.39	0.0127517			PA0390	-
PA0391	hypothetical protein	-1.64	6.34724e-08			PA0391	-
pyrB	aspartate carbamoyltransferase	-1.21	0.0462349			PA0402	-
gshB	glutathione synthetase	-2.08	5.61203e-22			PA0407	-
pilH	twitching motility protein PilH	-1.27	0.00430792			PA0409	+
pilI	twitching motility protein PilI	-1.27	0.0432617			PA0410	+
pilJ	twitching motility protein PilJ	-1.35	0.000133351			PA0411	+
chpA	component of chemotactic signal transduction system	-1.23	0.0146336			PA0413	+
PA0443	transporter	-1.54	0.0216875			PA0443	+
PA0446	hypothetical protein	1.69	1.89195e-09			PA0446	-
gcdH	glutaryl-CoA dehydrogenase	1.93	0.000115356			PA0447	-
PA0454	hypothetical protein	-1.26	0.0208091			PA0454	-
PA0456	cold-shock protein	-1.27	0.00204269			PA0456	+
PA0459	ClpA/B protease ATP binding subunit	1.66	1.24724e-10			PA0459	+
PA0469	hypothetical protein	-1.3	0.0149615			PA0469	+
fiuA	ferrichrome receptor FiuA	-1.44	0.00102957			PA0470	-
PA0471	transmembrane sensor	-1.86	0.00436311			PA0471	-
PA2774	hypothetical protein	1.71	1.96939e-09	3.13	0	PA2774	-
PA0477	transcriptional regulator	1.44	0.00197599			PA0477	-
PA0484	hypothetical protein	1.55	1.99192e-05			PA0484	+
PA0485	hypothetical protein	1.41	0.000264153			PA0485	-
PA0492	hypothetical protein	-7.42	1.23865e-76			PA0492	+
PA0493	hypothetical protein	-4.54	5.40527e-12			PA0493	+
PA0628	hypothetical protein	1.69	0.000771128	5.6	0	PA0628	+
PA0495	hypothetical protein	-1.59	1.2292e-05			PA0495	+
PA0496	hypothetical protein	-1.35	0.00425439			PA0496	+
tpiA	triosephosphate isomerase	1.69	1.32311e-12	3.1	0	PA4748	-
PA0498	hypothetical protein	-1.21	0.0436527			PA0498	-
PA0499	pili assembly chaperone	-1.34	0.00921703			PA0499	-
PA1214	hypothetical protein	1.68	0.00512859	12.12	0	PA1214	-
PA0507	acyl-CoA dehydrogenase	-1.4	0.0317142			PA0507	+
PA0521	cytochrome C oxidase subunit	-1.54	0.00259678			PA0521	+
norB	nitric-oxide reductase subunit B	-2.5	0.000718216			PA0524	+
PA0536	hypothetical protein	-5.07	6.66653e-58			PA0536	-
PA0537	hypothetical protein	-4.84	2.34621e-51			PA0537	-
PA0542	hypothetical protein	-1.82	2.33229e-12			PA0542	-
PA0544	hypothetical protein	1.3	0.0131487			PA0544	-
PA0545	hypothetical protein	-1.25	0.0135898			PA0545	+
fda	fructose-1,6-bisphosphate aldolase	-1.25	0.00547824			PA0555	+
PA0572	hypothetical protein	-1.54	7.54255e-05			PA0572	-
PA0574	hypothetical protein	-1.27	0.00837106			PA0574	-
Met_tRNA	Met tRNA	1.54	0.00837106			PA0574.1	-
rpoD	RNA polymerase sigma factor RpoD	1.33	0.00128518			PA0576	-
dnaG	DNA primase	1.3	0.00400661			PA0577	-
PA0578	hypothetical protein	1.81	2.33569e-07			PA0578	-
rpsU	30S ribosomal protein S21	1.63	6.79566e-09			PA0579	-
PA2286	hypothetical protein	1.68	7.85719e-05	4.15	0	PA2286	+
PA3520	hypothetical protein	1.64	4.03002e-06	4.33	0	PA3520	-
PA0587	hypothetical protein	1.43	1.34849e-05			PA0587	-
PA0588	hypothetical protein	1.66	6.40678e-12			PA0588	-
apaH	diadenosine tetraphosphatase	-1.24	0.0226441			PA0590	-
ibpA	heat-shock protein IbpA	1.61	0.00288404	4.11	0	PA3126	-
PA2072	hypothetical protein	1.59	4.54408e-05	3.15	0	PA2072	+
ostA	organic solvent tolerance protein OstA	1.28	0.0039935			PA0595	-
PA0602	ABC transporter	-1.53	8.55148e-07			PA0602	+
ptrB	repressor, PtrB	1.81	0.00116951			PA0612	+
PA0613	hypothetical protein	1.46	0.0255			PA0613	+
PA0616	hypothetical protein	1.48	0.0438891			PA0616	+
PA0617	bacteriophage protein	1.59	0.0117315			PA0617	+
PA0619	bacteriophage protein	1.63	0.0155644			PA0619	+
PA0620	bacteriophage protein	1.37	0.0300129			PA0620	+
PA0586	SpoVR family protein	1.54	9.02218e-08	2.74	0	PA0586	-
PA0622	bacteriophage protein	1.8	0.000877039			PA0622	+
PA0623	bacteriophage protein	1.62	0.0053126			PA0623	+
PA0624	hypothetical protein	1.76	0.000866352			PA0624	+
PA0625	hypothetical protein	1.61	0.00246793			PA0625	+
PA0626	hypothetical protein	1.54	0.00863341			PA0626	+
PA0627	hypothetical protein	1.79	0.000580702			PA0627	+
PA0329	hypothetical protein	1.53	5.10875e-08	6.15	0	PA0329	-
PA0629	hypothetical protein	1.51	0.0385996			PA0629	+
PA0631	hypothetical protein	1.58	0.00297724			PA0631	+
PA0632	hypothetical protein	1.86	1.14946e-05			PA0632	+
PA0633	hypothetical protein	1.67	5.17987e-06			PA0633	+
PA0634	hypothetical protein	1.65	0.00890862			PA0634	+
PA0635	hypothetical protein	1.6	0.0131487			PA0635	+
PA0637	hypothetical protein	1.6	0.0118647			PA0637	+
PA0639	hypothetical protein	1.83	7.64636e-05			PA0639	+
PA0640	bacteriophage protein	1.47	0.0370321			PA0640	+
PA0641	bacteriophage protein	1.36	0.0436911			PA0641	+
PA0648	hypothetical protein	1.22	0.0409926			PA0648	+
trpC	indole-3-glycerol phosphate synthase	-1.21	0.0417081			PA0651	+
vfr	cAMP-regulatory protein	-1.38	8.09164e-05			PA0652	-
speD	S-adenosylmethionine decarboxylase	1.56	6.85253e-06			PA0654	+
PA0659	hypothetical protein	1.28	0.00447834			PA0659	-
PA0660	hypothetical protein	-1.43	0.000117621			PA0660	-
PA1688	hypothetical protein	1.53	1.18484e-06	3.8	0	PA1688	+
tyrZ	tyrosyl-tRNA synthetase	1.23	0.020347			PA0668	+
hemO	heme oxygenase	-2.03	5.18663e-07			PA0672	+
PA0673	hypothetical protein	-1.54	0.0169951			PA0673	-
pslO	hypothetical protein	1.52	0.00157601	6.17	0	PA2245	+
vreR	sigma factor regulator, VreR	2.29	0.000732412			PA0676	+
PA3818	extragenic suppressor protein SuhB	1.49	1.07126e-05	3.4	0	PA3818	+
PA0692	hypothetical protein	-1.74	0.00147953			PA0692	+
cat	chloramphenicol acetyltransferase	1.29	0.0222783			PA0706	-
toxR	transcriptional regulator ToxR	-1.5	0.0305898			PA0707	-
PA0708	transcriptional regulator	-1.72	1.4695e-06			PA0708	-
gloA2	lactoylglutathione lyase	-2	0.00303519			PA0710	+
PA0712	hypothetical protein	-2.29	0.00242449			PA0712	-
PA0714	hypothetical protein	-2.16	0.00263612			PA0714	+
PA0717	hypothetical protein	-2.76	0.000853467			PA0717	+
PA0718	hypothetical protein	-2.24	0.00139379			PA0718	+
PA0719	hypothetical protein	-2.02	0.0310655			PA0719	+
PA0725	hypothetical protein	-1.59	0.00929821			PA0725	+
PA0727	hypothetical protein	-1.24	0.0387417			PA0727	+
PA0728	bacteriophage integrase	-1.4	0.00493653			PA0728	+
PA0730	transferase	1.35	0.000523319			PA0730	-
PA0736	hypothetical protein	1.34	0.00736978			PA0736	-
PA0739	transcriptional regulator	-1.51	0.0111874			PA0739	-
PA0744	enoyl-CoA hydratase	-1.22	0.0230748			PA0744	-
PA0745	enoyl-CoA hydratase	-1.47	1.3809e-06			PA0745	-
PA0746	acyl-CoA dehydrogenase	-1.43	0.000238432			PA0746	-
PA0747	aldehyde dehydrogenase	-1.3	0.00250418			PA0747	-
ung	uracil-DNA glycosylase	1.32	0.0056305			PA0750	+
PA0070	hypothetical protein	1.48	8.52002e-06	3.36	0	PA0070	-
mucB	negative regulator for alginate biosynthesis MucB	1.21	0.0355919			PA0764	+
mucC	positive regulator for alginate biosynthesis MucC	1.3	0.00218634			PA0765	+
lepA	GTP-binding protein LepA	1.41	3.08646e-05			PA0767	+
rnc	ribonuclease III	1.32	0.00518048			PA0770	+
PA0774	hypothetical protein	1.55	0.00294737			PA0774	-
PA0781	hypothetical protein	-1.44	0.0245888			PA0781	-
putA	bifunctional proline dehydrogenase/pyrroline-5-carboxylate dehydrogenase	1.24	0.0161014			PA0782	+
PA0947	DNA replication initiation factor	1.48	6.30822e-07	4.78	0	PA0947	+
PA0787	hypothetical protein	-2.2	1.78756e-13			PA0787	+
PA0793	hypothetical protein	-1.66	0.000195039			PA0793	-
PA0794	aconitate hydratase	-1.51	7.67809e-05			PA0794	-
PA0977	hypothetical protein	1.48	0.00550979	2.35	0	PA0977	-
prpB	2-methylisocitrate lyase	-1.62	0.0419954			PA0796	-
pmtA	phospholipid methyltransferase	1.76	3.9688e-07			PA0798	+
PA0801	hypothetical protein	1.28	0.0459689			PA0801	+
PA0805	hypothetical protein	1.33	0.000453386			PA0805	-
PA0806	hypothetical protein	1.58	6.30822e-07			PA0806	+
gcp	DNA-binding/iron metalloprotein/AP endonuclease	1.46	0.000379989	7.06	0	PA0580	+
PA0826	hypothetical protein	-1.38	7.41935e-05			PA0826	-
PA0826.1	tmRNA tag peptide	1.5	0.0023388			PA0826.1	-
ssrA		1.35	0.0163744			PA0826.2	-
pta	phosphate acetyltransferase	-1.57	1.12208e-07			PA0835	-
ackA	acetate kinase	-1.7	6.4773e-10			PA0836	-
PA0836.1		-1.47	0.0033332			PA0836.1	+
plcR	phospholipase accessory protein PlcR	1.34	0.000916089			PA0843	-
plcH	hemolytic phospholipase C	-1.52	0.0387417			PA0844	-
PA0845	hypothetical protein	-1.42	0.0387417			PA0845	-
PA3177	hypothetical protein	1.46	7.15303e-05	8.41	0	PA3177	+
PA0856	hypothetical protein	1.21	0.0366956			PA0856	+
PA0858	hypothetical protein	1.3	0.006498			PA0858	+
PA0860	ABC transporter ATP-binding protein/permease	1.39	0.000950606			PA0860	+
aroP2	aromatic amino acid transporter AroP2	-1.27	0.00472385			PA0866	+
PA0868	peptidyl-tRNA hydrolase	1.34	0.00523566			PA0868	+
pbpG	D-alanyl-D-alanine endopeptidase	1.25	0.00986541			PA0869	-
PA0879	acyl-CoA dehydrogenase	-1.46	0.0209966			PA0879	+
PA0886	C4-dicarboxylate transporter	-1.4	0.0330172			PA0886	+
acsA	acetyl-CoA synthetase	-1.75	1.16218e-06			PA0887	+
PA0887.1		1.56	0.000595154			PA0887.1	+
aotJ	arginine/ornithine binding protein AotJ	1.45	4.2848e-06			PA0888	+
PA0894	hypothetical protein	1.78	4.61843e-06			PA0894	-
aruG	arginine/ornithine succinyltransferase AII subunit	1.31	0.00129945			PA0897	+
aruD	succinylglutamic semialdehyde dehydrogenase	1.23	0.035484			PA0898	+
aruB	succinylarginine dihydrolase	1.26	0.00837443			PA0899	+
PA0900	hypothetical protein	1.23	0.0257455			PA0900	+
aruE	succinylglutamate desuccinylase	1.41	0.000110244			PA0901	+
rsmA	carbon storage regulator	1.57	0.0054793			PA0905	+
PA3177	hypothetical protein	1.46	7.15303e-05	5.74	0	PA3177	+
Arg_tRNA	Arg tRNA	1.77	6.4204e-13			PA0905.2	+
PA0909	hypothetical protein	1.95	0.00704068			PA0909	+
PA0911	hypothetical protein	1.87	0.00751634			PA0911	+
PA0916	hypothetical protein	1.41	0.00122763			PA0916	-
kup	potassium uptake protein Kup	1.34	0.00220799			PA0917	+
PA0919	hypothetical protein	-1.33	0.00171796			PA0919	-
PA0920	hypothetical protein	-1.88	1.11971e-14			PA0920	-
PA0921	hypothetical protein	-3.82	2.41894e-41			PA0921	+
PA0925	hypothetical protein	-1.32	0.0380609			PA0925	-
PA1531	hypothetical protein	1.45	0.0350805	2.62	0	PA1531	-
PA0930	two-component sensor	-1.28	0.0164819			PA0930	+
ygcA	23S rRNA 5-methyluridine methyltransferase	1.27	0.0069053			PA0933	+
PA1958	transporter	1.45	0.000357605	2.58	0	PA1958	-
PA0939	hypothetical protein	-1.42	0.0387417			PA0939	-
purM	phosphoribosylaminoimidazole synthetase	1.34	0.00269857			PA0945	-
PA4915	chemotaxis transducer	1.45	9.21107e-06	6.54	0	PA4915	+
PA0950	arsenate reductase	1.26	0.0135124			PA0950	-
PA0952	hypothetical protein	-1.31	0.00821845			PA0952	-
PA0954	acylphosphatase	-1.37	0.0305898			PA0954	+
PA0955	hypothetical protein	1.26	0.0153498			PA0955	-
proS	prolyl-tRNA synthetase	1.26	0.0348982			PA0956	-
PA0959	hypothetical protein	1.23	0.0290746			PA0959	+
PA0962	dna-binding stress protein	1.27	0.00588909			PA0962	-
PA0968	hypothetical protein	1.24	0.0144203			PA0968	+
tolQ	TolQ protein	1.23	0.0402672			PA0969	+
tolA	TolA protein	1.25	0.00878866			PA0971	+
tolB	translocation protein TolB	-1.41	8.62559e-05			PA0972	+
oprL	peptidoglycan associated lipoprotein OprL precursor	-1.56	2.14689e-09			PA0973	+
PA0976	hypothetical protein	-1.85	1.51856e-12			PA0976	+
Lys_tRNA	Lys tRNA	-4.6	1.35426e-31			PA0976.1	+
PA4915	chemotaxis transducer	1.45	9.21107e-06	6.22	0	PA4915	+
PA0979	hypothetical protein	-1.36	0.0432697			PA0979	-
PA0980	hypothetical protein	-1.34	0.0443632			PA0980	+
PA0983	hypothetical protein	1.35	0.00207303			PA0983	+
pyoS5	pyocin S5	-1.49	0.0143896			PA0985	-
PA0986	hypothetical protein	-1.72	0.00215025			PA0986	+
PA0989	hypothetical protein	1.28	0.0091497			PA0989	-
cupC2	chaperone CupC2	-2	0.0445131			PA0993	+
pqsA	coenzyme A ligase	2.37	2.38021e-30			PA0996	+
pqsB	PqsB	2.31	2.0628e-26			PA0997	+
pqsC	PqsC	2.25	4.16073e-25			PA0998	+
pqsD	3-oxoacyl-ACP synthase	2.24	8.75516e-24			PA0999	+
pqsE	Quinolone signal response protein	2.29	3.15637e-26			PA1000	+
phnA	anthranilate synthase component I	2.3	1.95085e-27			PA1001	+
phnB	anthranilate synthase component II	1.78	2.71856e-11			PA1002	+
mvfR	transcriptional regulator MvfR	1.9	2.74353e-14			PA1003	-
PA1009	hypothetical protein	1.23	0.028212			PA1009	-
dapA	dihydrodipicolinate synthase	1.36	0.000395887			PA1010	+
PA1011	hypothetical protein	1.41	0.000148129			PA1011	+
PA1012	hypothetical protein	1.23	0.0220446			PA1012	+
pntAA	NAD(P) transhydrogenase subunit alpha	1.44	0.000188064	8.02	0	PA0195	+
PA1030	hypothetical protein	1.26	0.0162255			PA1030	+
quiP	QuiP	1.43	2.76666e-05			PA1032	-
PA1039	hypothetical protein	-1.87	4.45174e-08			PA1039	-
PA1040	hypothetical protein	-1.42	0.00428436			PA1040	-
PA1041	hypothetical protein	-4.37	2.42414e-14			PA1041	+
PA1047	esterase	1.21	0.035484			PA1047	+
PA1048	hypothetical protein	-1.79	6.29826e-07			PA1048	+
PA1053	hypothetical protein	1.35	0.0335619			PA1053	+
PA1068	heat shock protein (hsp90 family)	4.77	1.11529e-87			PA1068	+
PA1159	cold-shock protein	1.44	0.000118111	4.55	0	PA1159	+
Thr_tRNA	Thr tRNA	1.43	1.12768e-05	2.75	0	PA4277.1	-
braC	branched-chain amino acid ABC transporter	-1.46	3.89779e-06			PA1074	-
PA1075	hypothetical protein	-1.3	0.0150668			PA1075	+
flgB	flagellar basal-body rod protein FlgB	-3.16	8.25894e-32			PA1077	+
flgC	flagellar basal body rod protein FlgC	-2.65	8.67226e-34			PA1078	+
flgD	flagellar basal body rod modification protein	-2.85	1.31419e-37			PA1079	+
napC	cytochrome C protein NapC	1.42	0.00135392	17.44	0	PA1172	-
flgF	flagellar basal body rod protein FlgF	-4.17	6.83742e-61			PA1081	+
PA1509	hypothetical protein	1.41	5.39307e-06	3.36	0	PA1509	-
flgH	flagellar basal body L-ring protein	-4.33	1.15998e-12			PA1083	+
flgI	flagellar basal body P-ring biosynthesis protein FlgA	-3.65	1.72826e-37			PA1084	+
flgJ	flagellar rod assembly protein/muramidase FlgJ	-4.07	1.70254e-60			PA1085	+
flgK	flagellar hook-associated protein FlgK	-3.24	1.56094e-49			PA1086	+
flgL	flagellar hook-associated protein FlgL	-2.37	8.96897e-28			PA1087	+
PA1509	hypothetical protein	1.41	5.39307e-06	3.23	0	PA1509	-
PA1089	hypothetical protein	-2.96	1.87299e-24			PA1089	+
PA1090	hypothetical protein	-2.54	1.53737e-16			PA1090	+
fgtA	flagellar glycosyl transferase, FgtA	-2.45	4.52848e-30			PA1091	+
fliC	flagellin type B	-2.63	4.23697e-14			PA1092	+
PA1093	hypothetical protein	-1.75	1.93619e-09			PA1093	+
fliD	flagellar capping protein FliD	-2.1	1.46729e-23			PA1094	+
PA1095	flagellar protein FliS	-2.49	6.38584e-22			PA1095	+
PA1096	hypothetical protein	-2.18	1.51836e-22			PA1096	+
secE	preprotein translocase subunit SecE	1.41	1.11895e-05	2.06	0	PA4276	-
fleS	two-component sensor	-2.72	3.09462e-16			PA1098	+
fleR	two-component response regulator	-2.5	5.41364e-17			PA1099	+
fliE	flagellar hook-basal body protein FliE	-2.35	5.81712e-21			PA1100	+
PA5087	hypothetical protein	1.41	1.37924e-05	2.47	0	PA5087	-
fliG	flagellar motor switch protein G	-1.9	1.53149e-15			PA1102	+
PA1103	flagellar assembly protein H	-1.73	0.0050136			PA1103	+
fliI	flagellum-specific ATP synthase	-1.91	1.33633e-11			PA1104	+
fliJ	flagellar biosynthesis chaperone	-1.62	6.53486e-05			PA1105	+
snr1	cytochrome C Snr1	1.4	0.00240572	3.13	0	PA3032	-
PA1109	transcriptional regulator	-1.3	0.0435227			PA1109	+
PA1116	hypothetical protein	1.32	0.0294962			PA1116	+
PA1117	hypothetical protein	1.48	0.032545			PA1117	-
PA1123	hypothetical protein	1.29	0.0249277			PA1123	-
PA1127	oxidoreductase	-2.06	6.7883e-08			PA1127	-
PA1132	hypothetical protein	-4.01	9.60415e-42			PA1132	+
PA1134	hypothetical protein	-2.29	0.00176281			PA1134	-
PA1137	oxidoreductase	-1.59	2.71444e-07			PA1137	-
PA1139	hypothetical protein	-1.39	0.00272628			PA1139	+
PA1144	major facilitator superfamily (MFS) transporter	-1.86	0.0182758			PA1144	-
PA1149	hypothetical protein	-1.79	0.0245504			PA1149	-
PA1152	hypothetical protein	1.46	1.02566e-05			PA1152	+
PA1153	hypothetical protein	-1.33	0.0341346			PA1153	-
rpsP	30S ribosomal protein S16	1.4	0.00090978	2.74	0	PA3745	-
PA1166	hypothetical protein	1.44	0.0169209			PA1166	-
PA1168	hypothetical protein	-2.01	5.7635e-07			PA1168	+
PA0621	hypothetical protein	1.39	0.0443632	2.39	0	PA0621	+
napB	cytochrome C protein NapB	2.36	1.96495e-08			PA1173	-
napA	nitrate reductase catalytic subunit	1.39	0.000595712			PA1174	-
napD	NapD protein of periplasmic nitrate reductase	2.02	1.06591e-05			PA1175	-
napF	ferredoxin protein NapF	2.08	1.37554e-06			PA1176	-
napE	periplasmic nitrate reductase protein NapE	1.91	5.2467e-10			PA1177	-
PA1181	sensor protein	1.31	0.00459739			PA1181	+
PA1192	hypothetical protein	1.24	0.0412236			PA1192	+
PA2811	ABC transporter permease	1.39	0.000149265	2.7	0	PA2811	-
PA1200	hypothetical protein	-4.12	4.63177e-34			PA1200	+
PA1205	hypothetical protein	1.37	0.00267442			PA1205	+
PA4523	hypothetical protein	1.39	3.37243e-05	2.9	0	PA4523	-
PA1245	hypothetical protein	-2.12	8.53835e-17			PA1245	+
aprD	alkaline protease secretion protein AprD	-2.05	8.42177e-15			PA1246	+
aprE	alkaline protease secretion protein AprE	-1.91	3.03703e-10			PA1247	+
aprF	alkaline protease secretion outer membrane protein AprF precursor	-1.79	8.75853e-11			PA1248	+
aprA	alkaline metalloproteinase	-2.71	3.44325e-13			PA1249	+
aprI	alkaline proteinase inhibitor AprI	1.27	0.0168093			PA1250	+
PA1260	amino acid ABC transporter substrate-binding protein	-2.15	0.000310457			PA1260	-
PA1271	tonB-dependent receptor	1.36	0.00103273			PA1271	+
PA5120	hypothetical protein	1.39	0.0155604	11.75	0	PA5120	+
PA1274	hypothetical protein	1.33	0.0112271			PA1274	+
cobD	cobalamin biosynthesis protein	1.3	0.0447628			PA1275	+
PA1287	glutathione peroxidase	-1.36	0.0116393			PA1287	+
PA1289	hypothetical protein	1.41	0.0108711			PA1289	-
phnX	phosphonoacetaldehyde hydrolase	-1.45	0.0120214			PA1311	+
PA1315	transcriptional regulator	1.28	0.0136442			PA1315	-
PA1322	TonB-dependent receptor	-1.4	0.00566928			PA1322	+
PA1324.1		1.62	7.462e-05			PA1324.1	+
PA1325	hypothetical protein	1.47	0.00345959			PA1325	+
PA1330	short-chain dehydrogenase	-1.47	0.00379905			PA1330	+
PA1736	acetyl-CoA acetyltransferase	1.38	0.00112223	3.85	0	PA1736	+
PA1335	two-component response regulator	-1.86	5.41666e-11			PA1335	-
PA1336	two-component sensor	-1.81	4.44121e-12			PA1336	-
ansB	glutaminase-asparaginase	-2.7	6.41714e-42			PA1337	-
ggt	gamma-glutamyltranspeptidase	-3.99	2.19778e-37			PA1338	-
PA1339	amino acid ABC transporter ATP binding protein	-3.44	6.63036e-18			PA1339	-
PA2313	hypothetical protein	1.38	0.00057879	5.53	0	PA2313	+
PA1341	amino acid ABC transporter membrane protein	-3.48	1.18601e-12			PA1341	-
PA1342	ABC transporter	-3.72	4.55084e-28			PA1342	-
PA1343	hypothetical protein	1.33	0.00215458			PA1343	+
PA1344	short-chain dehydrogenase	1.29	0.0175588			PA1344	+
PA1347	transcriptional regulator	-2.47	5.08305e-08			PA1347	-
PA1348	hypothetical protein	-1.92	0.00123763			PA1348	+
PA1354	hypothetical protein	1.53	0.00329813			PA1354	-
PA1360	hypothetical protein	1.48	0.000139787			PA1360	+
PA1361	transporter	1.32	0.00860467			PA1361	-
PA1363	sigma-70 factor, ECF subfamily	1.66	2.60357e-07			PA1363	+
PA1370	hypothetical protein	-1.2	0.0390607			PA1370	+
PA1371	hypothetical protein	1.33	0.000476235			PA1371	-
galE	UDP-glucose 4-epimerase	-1.51	0.000431881			PA1384	+
PA1386	ABC transporter ATP-binding protein	-1.3	0.00476379			PA1386	+
PA1388	hypothetical protein	-1.33	0.0183649			PA1388	+
PA1389	glycosyl transferase family protein	-1.25	0.0484543			PA1389	+
PA1392	hypothetical protein	-1.28	0.0348968			PA1392	+
cysC	adenosine 5'-phosphosulfate (APS) kinase	-1.43	0.000996821			PA1393	-
PA1398	hypothetical protein	-1.34	0.0149615			PA1398	+
gbuR	protein GbuR	1.48	0.017716			PA1422	+
bdlA	BdlA	1.46	8.29398e-05			PA1423	-
PA1425	ABC transporter ATP-binding protein	1.68	5.471e-05			PA1425	+
rsaL	regulatory protein RsaL	1.28	0.0272122			PA1431	-
PA1441	hypothetical protein	-3.54	3.2971e-48			PA1441	+
PA1442	flagellar basal body protein FliL	-1.36	0.000625141			PA1442	+
fliM	flagellar motor switch protein FliM	-1.21	0.0317984			PA1443	+
fliN	flagellar motor switch protein	-1.59	8.70646e-07			PA1444	+
fliQ	flagellar biosynthesis protein FliQ	-1.31	0.0487663			PA1447	+
flhA	flagellar biosynthesis protein FlhA	-1.84	5.37154e-09			PA1452	+
flhF	flagellar biosynthesis regulator FlhF	-1.48	3.66859e-07			PA1453	+
fleN	flagellar synthesis regulator FleN	-1.19	0.039785			PA1454	+
cheY	chemotaxis protein CheY	-1.36	0.000269273			PA1456	+
cheZ	chemotaxis protein CheZ	-1.32	0.00121526			PA1457	+
PA1458	two-component sensor	-1.51	1.7171e-07			PA1458	+
PA1459	chemotaxis-specific methylesterase	-1.49	7.77163e-06			PA1459	+
motC	flagellar motor protein	-1.35	0.00392183			PA1460	+
motD	flagellar motor protein MotD	-1.23	0.0412236			PA1461	+
PA1462	plasmid partitioning protein	-1.42	0.000643443			PA1462	+
PA1463	hypothetical protein	-1.48	3.33339e-06			PA1463	+
PA1464	purine-binding chemotaxis protein	-1.59	9.98669e-09			PA1464	+
PA1465	hypothetical protein	-1.38	0.0404962			PA1465	+
PA4292	phosphate transporter	1.38	0.000301094	6.36	0	PA4292	+
PA1474	hypothetical protein	-1.5	0.000181193			PA1474	-
ccmA	cytochrome C biogenesis protein CcmA	1.69	6.57583e-06			PA1475	+
cycH	cytochrome C biogenesis protein	1.24	0.0299574			PA1483	+
cysP	sulfate ABC transporter substrate-binding protein	-1.54	2.69064e-05			PA1493	-
PA1506	hypothetical protein	1.34	0.0127309			PA1506	+
mvaT	transcriptional regulator MvaT, P16 subunit	1.37	0.000202046	3.4	0	PA4315	+
PA0846	sulfate transporter CysZ	1.36	0.00897523	3.54	0	PA0846	-
PA1510	hypothetical protein	1.54	2.16097e-08			PA1510	-
PA1513	hypothetical protein	1.48	0.0135124			PA1513	-
PA1514	ureidoglycolate hydrolase	1.73	6.76967e-10			PA1514	-
alc	allantoicase	1.83	3.68479e-09			PA1515	-
PA1516	hypothetical protein	1.63	0.000110012			PA1516	-
PA1517	hypothetical protein	1.52	3.15951e-05			PA1517	-
PA1518	hypothetical protein	1.37	0.00246832			PA1518	+
PA1520	transcriptional regulator	-1.31	0.00303215			PA1520	+
PA1527	hypothetical protein	1.27	0.00377725			PA1527	+
pslA	protein PslA	1.35	0.000427807	2.1	0	PA2231	+
lig	NAD-dependent DNA ligase LigA	-1.38	0.00030022			PA1529	+
PA1530	hypothetical protein	-1.33	0.00116915			PA1530	+
PA3276	hypothetical protein	1.35	0.0438367	10.66	0	PA3276	-
PA1545	hypothetical protein	-2.07	3.3646e-22			PA1545	+
PA1549	cation-transporting P-type ATPase	1.23	0.0300612			PA1549	-
PA1550	hypothetical protein	1.25	0.0462283			PA1550	-
PA1551	ferredoxin	1.27	0.00446493			PA1551	-
PA1558	hypothetical protein	-1.52	0.00206266			PA1558	+
PA1559	hypothetical protein	1.71	1.70929e-10			PA1559	+
PA1560	hypothetical protein	1.36	0.00638878			PA1560	+
wbpG	LPS biosynthesis protein WbpG	1.34	0.000234708	2.63	0	PA3150	-
PA1570	transcriptional regulator	-1.23	0.0454153			PA1570	+
PA1571	hypothetical protein	-1.23	0.0323394			PA1571	-
PA1572	hypothetical protein	-1.34	0.000523319			PA1572	+
PA1573	hypothetical protein	-1.44	0.000592819			PA1573	+
PA1575	hypothetical protein	1.92	0.000100374			PA1575	-
PA1591	hypothetical protein	1.41	0.00631367			PA1591	+
PA1595	hypothetical protein	1.34	0.0198277			PA1595	+
htpG	heat shock protein 90	1.36	0.000200679			PA1596	+
PA1607	hypothetical protein	1.75	5.32235e-10			PA1607	-
PA1608	chemotaxis transducer	-1.35	0.00647117			PA1608	-
PA1629	enoyl-CoA hydratase	-1.49	0.0308493			PA1629	-
PA1630	transcriptional regulator	-1.28	0.0274493			PA1630	+
kdpD	two-component sensor KdpD	1.32	0.0279679			PA1636	+
PA1640	hypothetical protein	1.26	0.0131487			PA1640	-
PA1646	chemotaxis transducer	-1.38	0.0156794			PA1646	+
PA1650	transporter	1.33	0.00646039			PA1650	+
PA1654	aminotransferase	-1.35	0.00188153			PA1654	+
PA1655	glutathione S-transferase	-1.61	1.76498e-07			PA1655	+
PA3723	FMN oxidoreductase	1.34	0.0044302	3.62	0	PA3723	-
PA3670	hypothetical protein	1.33	0.0022237	8.48	0	PA3670	-
PA1658	hypothetical protein	-2.7	1.6204e-16			PA1658	+
PA1659	hypothetical protein	-3.91	2.35589e-11			PA1659	+
PA1660	hypothetical protein	-2.5	8.60466e-18			PA1660	+
PA1661	hypothetical protein	-2.94	2.82757e-18			PA1661	+
PA1662	ClpA/B-type protease	-1.67	3.93556e-08			PA1662	+
PA1663	transcriptional regulator	-2.02	5.78953e-07			PA1663	+
PA3674	hypothetical protein	1.3	0.0150677	4.76	0	PA3674	+
PA1665	hypothetical protein	-2.28	8.51078e-08			PA1665	+
PA1666	hypothetical protein	-2.16	9.14718e-09			PA1666	+
PA1667	hypothetical protein	-1.54	0.000184107			PA1667	+
PA4404	hypothetical protein	1.3	0.0103937	2.03	1.24e-291	PA4404	-
fusA2	elongation factor G	1.29	0.00405098	5.42	0	PA2071	+
PA1669	hypothetical protein	-1.46	0.000284338			PA1669	+
stp1	serine/threonine phosphoprotein phosphatase Stp1	-1.52	0.0358198			PA1670	+
folE2	GTP cyclohydrolase I	1.53	6.02946e-07			PA1674	-
PA1676	hypothetical protein	1.45	0.0116337			PA1676	-
PA1679	hypothetical protein	-2.18	2.97332e-13			PA1679	-
PA3106	oxidoreductase	1.29	0.0106063	6.23	0	PA3106	-
PA1682	MFS metabolite transporter	1.31	0.0124815			PA1682	+
PA3854	GIY-YIG nuclease superfamily protein	1.29	0.00774187	4.48	0	PA3854	-
pscU	translocation protein in type III secretion	-1.36	0.0370321			PA1690	-
pscR	type III secretion system protein	1.26	0.0460042			PA1693	-
PA1697	type III secretion system ATPase	-1.87	0.002381			PA1697	-
popN	type III secretion outer membrane protein PopN precursor	-1.89	0.0436527			PA1698	+
pcrG	regulator in type III secretion	-2.15	0.00600366			PA1705	+
pcrV	type III secretion protein PcrV	-1.94	2.84304e-05			PA1706	+
pcrH	regulatory protein PcrH	-1.71	4.13944e-06			PA1707	+
popB	translocator protein PopB	-1.6	5.93666e-07			PA1708	+
popD	translocator outer membrane protein PopD precursor	-1.55	0.00778287			PA1709	+
PA3934	hypothetical protein	1.29	0.00391649	5.47	0	PA3934	-
exsE	ExsE	-2.07	0.00134823			PA1711	+
exsB	exoenzyme S synthesis protein B	-2.66	7.00553e-13			PA1712	+
exsA	transcriptional regulator ExsA	-2.74	4.32555e-35			PA1713	+
exsD	ExsD	-1.7	6.63225e-06			PA1714	+
pscC	type III secretion outer membrane protein PscC precursor	-1.79	4.91886e-06			PA1716	+
pscD	type III export protein PscD	-1.56	0.00115008			PA1717	+
pscE	type III export protein PscE	-1.71	0.00333874			PA1718	+
pscF	type III export protein PscF	-1.58	0.00194527			PA1719	+
pscG	type III export protein PscG	-1.78	0.028683			PA1720	+
pscJ	type III export protein PscJ	-1.45	0.00105223			PA1723	+
piv	endopeptidase IV	1.29	0.0191642	2.21	0	PA4175	+
bglX	beta-glucosidase	1.62	1.92788e-05			PA1726	-
pqqF	pyrroloquinoline quinone biosynthesis protein F	1.28	0.0497381	7.37	0	PA1973	+
PA1728	hypothetical protein	-5.01	3.24653e-17			PA1728	+
PA1732	hypothetical protein	1.76	0.000148542			PA1732	+
fabD	malonyl CoA-ACP transacylase	1.28	0.0091165	3.64	0	PA2968	-
wspA	chemotaxis transducer	1.28	0.00463648	2.35	0	PA3708	-
PA1739	oxidoreductase	-1.44	0.0424102			PA1739	+
PA1745	hypothetical protein	1.4	0.00268463			PA1745	-
PA1750	phospho-2-dehydro-3-deoxyheptonate aldolase	1.43	0.000466941			PA1750	-
cysH	phosphoadenosine phosphosulfate reductase	-3.11	1.4241e-25			PA1756	-
PA1759	transcriptional regulator	-1.55	4.99303e-08			PA1759	+
PA1760	transcriptional regulator	-1.35	0.000337511			PA1760	+
PA1761	hypothetical protein	-1.64	5.47702e-06			PA1761	+
PA1762	hypothetical protein	-1.47	0.000348744			PA1762	+
PA1765	hypothetical protein	-1.42	0.00684694			PA1765	+
PA1768	hypothetical protein	1.44	2.07418e-05			PA1768	-
PA1769	hypothetical protein	1.3	0.00225165			PA1769	-
crfX	CrfX protein	1.7	3.45467e-05			PA1774	+
cmpX	hypothetical protein	1.28	0.00355055			PA1775	+
nirB	assimilatory nitrite reductase large subunit	-1.58	0.0165233			PA1781	-
PA3825	hypothetical protein	1.28	0.0239178	3.43	0	PA3825	-
cobO	cob(I)yrinic acid a,c-diamide adenosyltransferase	1.27	0.0161788	3.54	0	PA1272	+
PA1789	hypothetical protein	1.28	0.0143869			PA1789	-
PA1790	hypothetical protein	1.44	0.0072877			PA1790	+
PA1791	hypothetical protein	1.55	8.37005e-07			PA1791	-
folD	bifunctional 5,10-methylene-tetrahydrofolate dehydrogenase/ 5,10-methylene-tetrahydrofolate cyclohydrolase	1.34	0.0234323			PA1796	-
Arg_tRNA	Arg tRNA	1.33	0.00130806			PA1796.1	+
His_tRNA	His tRNA	1.26	0.0300851			PA1796.2	+
Leu_tRNA	Leu tRNA	1.4	0.00897523			PA1796.3	+
PA1797	hypothetical protein	1.84	6.14391e-15			PA1797	-
clpP	ATP-dependent Clp protease proteolytic subunit	-1.32	0.0006856			PA1801	+
clpX	ATP-dependent protease ATP-binding subunit ClpX	-1.2	0.0372893			PA1802	+
mltD	membrane-bound lytic murein transglycosylase D	1.27	0.00452456			PA1812	-
PA1814	hypothetical protein	1.29	0.0113937			PA1814	+
rnhA	ribonuclease H	1.37	0.0100258			PA1815	+
PA1817	hypothetical protein	1.19	0.0370783			PA1817	-
PA1819	amino acid permease	1.4	5.01872e-05			PA1819	+
PA1821	enoyl-CoA hydratase	1.41	4.42715e-05			PA1821	+
fimL	hypothetical protein	1.2	0.0499777			PA1822	+
PA1824	hypothetical protein	1.54	5.44675e-05			PA1824	-
PA1830	hypothetical protein	1.54	8.17976e-05			PA1830	-
PA1831	hypothetical protein	2.04	0.000286342			PA1831	-
cysI	sulfite reductase	1.56	1.58851e-07			PA1838	-
PA1839	ribosomal RNA large subunit methyltransferase N	1.47	0.000253528			PA1839	-
PA1844	hypothetical protein	2.49	0.00115008			PA1844	-
PA1845	hypothetical protein	8.26	1.71451e-104			PA1845	-
PA1852	hypothetical protein	1.29	0.00267421			PA1852	-
xqhA	secretion protein XqhA	-1.43	0.0358582			PA1868	+
PA1869	acyl carrier protein	1.49	0.00376597			PA1869	+
PA1870	hypothetical protein	-2.09	1.06591e-05			PA1870	+
PA2791	hypothetical protein	1.27	0.0490355	2.39	0	PA2791	-
PA0760	hypothetical protein	1.26	0.0290318	7.92	0	PA0760	+
PA1888	hypothetical protein	-2.13	1.00183e-05			PA1888	-
PA1891	hypothetical protein	2.25	0.00272628			PA1891	-
PA1893	hypothetical protein	1.4	0.00166377			PA1893	-
PA1907	hypothetical protein	-1.52	0.0134922			PA1907	-
PA1909	hypothetical protein	-1.68	0.00878614			PA1909	-
femA	ferric-mycobactin receptor, FemA	-1.62	0.000866352			PA1910	-
femR	sigma factor regulator, FemR	-2.21	0.00629335			PA1911	-
femI	ECF sigma factor, FemI	-4.13	1.30815e-20			PA1912	-
PA1014	glycosyl transferase family protein	1.25	0.0162632	3.01	0	PA1014	+
PA1914	hypothetical protein	-2.53	2.68062e-15			PA1914	-
PA3767	hypothetical protein	1.25	0.0268774	3.22	0	PA3767	-
PA1940	hypothetical protein	-7.3	1.07206e-79			PA1940	-
PA4924	hypothetical protein	1.25	0.0195311	2.59	0	PA4924	-
PA1945	transcriptional regulator	1.53	0.00275798			PA1945	+
rbsB	ribose ABC transporter substrate-binding protein	-1.26	0.00691704			PA1946	+
PA1954	hypothetical protein	-1.78	0.0362104			PA1954	-
opr86	outer membrane protein Opr86	1.24	0.0176644	3	0	PA3648	-
bacA	undecaprenyl pyrophosphate phosphatase	1.32	0.00497888			PA1959	+
PA1960	hypothetical protein	1.45	0.0139477			PA1960	+
PA1967	hypothetical protein	-2.67	3.75492e-17			PA1967	-
wbpJ	glycosyl transferase WbpJ	1.22	0.0158142	4.35	0	PA3147	-
PA1974	hypothetical protein	-1.4	0.0421275			PA1974	+
ercS'	ErcS protein	-1.44	0.0432697			PA1976	+
erbR	response regulator ErbR	-1.56	0.00107127			PA1978	-
pqqE	pyrroloquinoline quinone biosynthesis protein PqqE	-1.37	0.00508949			PA1989	+
dhcR	transcriptional regulator DhcR	-1.34	0.0273607			PA1998	-
dhcB	dehydrocarnitine CoA transferase subunit B	-1.28	0.00377725			PA2000	+
liuA	isovaleryl-CoA dehydrogenase	-1.25	0.00791939			PA2015	-
PA2018	multidrug efflux protein	1.59	1.20582e-07			PA2018	-
PA2019	periplasmic multidrug efflux lipoprotein	1.79	1.1512e-07			PA2019	-
PA2020	transcriptional regulator	1.55	2.84195e-06			PA2020	+
PA2024	ring-cleaving dioxygenase	1.43	0.0222511			PA2024	-
PA2027	hypothetical protein	-1.72	0.0025826			PA2027	-
PA2036	hypothetical protein	-1.92	2.5395e-07			PA2036	+
PA2040	glutamine synthetase	1.51	2.88312e-07			PA2040	+
PA2063	hypothetical protein	1.4	0.0443632			PA2063	+
surA	peptidyl-prolyl cis-trans isomerase SurA	1.21	0.0380609	4.42	0	PA0594	-
surA	peptidyl-prolyl cis-trans isomerase SurA	1.21	0.0380609	3.05	0	PA0594	-
PA2076	transcriptional regulator	-1.59	0.000971809			PA2076	+
PA2077	hypothetical protein	-1.45	0.0235777			PA2077	-
PA2097	flavin-binding monooxygenase	-1.55	0.011084			PA2097	+
PA2108	thiamine pyrophosphate protein	1.59	8.88365e-05			PA2108	+
PA2109	hypothetical protein	1.52	8.09164e-05			PA2109	-
PA2111	hypothetical protein	1.72	1.35744e-09			PA2111	-
PA2112	LamB/YcsF family protein	1.53	0.00068438			PA2112	-
opdO	pyroglutatmate porin OpdO	1.38	8.23369e-05			PA2113	-
PA2114	major facilitator superfamily (MFS) transporter	1.4	1.87792e-05			PA2114	-
PA2115	transcriptional regulator	1.35	0.0126388			PA2115	+
PA2116	hypothetical protein	1.56	4.67877e-08			PA2116	+
PA2117	hypothetical protein	1.68	0.000286342			PA2117	-
ada	O6-methylguanine-DNA methyltransferase	1.79	9.77547e-07			PA2118	+
PA2126	hypothetical protein	-1.54	0.0103937			PA2126	-
PA2127	hypothetical protein	-1.25	0.0115349			PA2127	-
cupA1	fimbrial subunit CupA1	-2.24	3.13915e-06			PA2128	+
glgP	glycogen phosphorylase	1.73	4.50108e-09			PA2144	+
PA2145	hypothetical protein	30.14	6.3746e-258			PA2145	-
wzx	O-antigen translocase	1.21	0.0264274	3.52	0	PA3153	-
katE	hydroperoxidase II	2.22	4.68931e-15			PA2147	+
PA2148	hypothetical protein	1.62	0.0126832			PA2148	+
PA2164	glycosyl hydrolase	1.37	0.0490355			PA2164	-
PA2168	hypothetical protein	-1.69	0.0330172			PA2168	+
PA4488	hypothetical protein	1.21	0.0498418	7.77	0	PA4488	-
PA2182	hypothetical protein	1.46	0.00246633			PA2182	-
hcnA	hydrogen cyanide synthase HcnA	1.37	0.0175415			PA2193	+
hcnB	hydrogen cyanide synthase HcnB	1.3	0.0141055			PA2194	+
hcnC	hydrogen cyanide synthase HcnC	1.5	1.08211e-05			PA2195	+
PA2204	ABC transporter	-1.73	6.90659e-10			PA2204	-
PA2205	hypothetical protein	-1.68	0.0279532			PA2205	-
PA2224	hypothetical protein	1.53	5.4558e-05			PA2224	-
PA2226	hypothetical protein	1.47	3.31606e-05			PA2226	-
vqsM	AraC family transcriptional regulator	1.73	2.95773e-13			PA2227	-
def	peptide deformylase	1.2	0.0436527	2.51	0	PA0019	-
pslC	protein PslC	1.3	0.0124474			PA2233	+
pslF	protein PslF	1.34	0.0421275			PA2236	+
pslH	protein PslH	1.33	0.00260756			PA2238	+
ftsI	penicillin-binding protein 3	1.2	0.0405512	4.73	0	PA4418	-
bkdR	transcriptional regulator BkdR	-1.29	0.0395278			PA2246	-
bkdA1	2-oxoisovalerate dehydrogenase subunit alpha	-1.4	3.94869e-05			PA2247	+
bkdA2	2-oxoisovalerate dehydrogenase subunit beta	-1.34	0.000710521			PA2248	+
zipA	cell division protein ZipA	-1.2	0.0296327	3.02	0	PA1528	+
lpdV	dihydrolipoamide dehydrogenase	-1.27	0.0302232			PA2250	+
PA2252	AGCS sodium/alanine/glycine symporter	1.41	0.00246993			PA2252	+
ptxS	transcriptional regulator PtxS	-2	5.27963e-08			PA2259	+
PA2276	transcriptional regulator	1.34	0.0225313			PA2276	+
PA2281	transcriptional regulator	-1.35	0.0116651			PA2281	-
PA3190	sugar ABC transporter substrate-binding protein	-1.23	0.0252747	5.21	0	PA3190	-
PA2283	hypothetical protein	1.83	1.24702e-07			PA2283	+
PA2285	hypothetical protein	1.36	0.011339			PA2285	+
Thr_tRNA	Thr tRNA	-1.23	0.0445131	2.75	0	PA4524.1	-
ambE	protein AmbE	1.68	1.83309e-09			PA2302	-
ambD	protein AmbD	1.38	0.00159333			PA2303	-
ambC	protein AmbC	1.47	0.00144002			PA2304	-
ambB	protein AmbB	1.53	6.58871e-08			PA2305	-
ambA	protein AmbA	1.4	0.000598291			PA2306	-
PA2310	hypothetical protein	-1.71	0.0217788			PA2310	-
wbpZ	glycosyltransferase WbpZ	-1.23	0.0379599	4.35	0	PA5447	-
PA2314	major facilitator superfamily (MFS) transporter	1.96	0.00355674			PA2314	-
PA2340	binding-protein-dependent maltose/mannitol transport protein	-1.6	0.0143694			PA2340	+
PA2352	glycerophosphoryl diester phosphodiesterase	1.58	0.000101996			PA2352	+
msuD	methanesulfonate sulfonatase MsuD	1.62	0.0162255			PA2356	-
PA2358	hypothetical protein	1.67	0.00209984			PA2358	-
PA2361	hypothetical protein	1.29	0.0217644			PA2361	-
PA2363	hypothetical protein	1.41	0.0157421			PA2363	-
PA2364	hypothetical protein	1.53	0.000342271			PA2364	-
PA2366	uricase	1.23	0.0399922			PA2366	+
PA2369	hypothetical protein	1.89	0.000947187			PA2369	+
PA2370	hypothetical protein	1.69	0.0227553			PA2370	+
PA2371	ClpA/B-type protease	1.39	0.001326			PA2371	+
PA2372	hypothetical protein	1.55	6.03662e-08			PA2372	+
PA2384	hypothetical protein	-2.15	0.00139846			PA2384	-
pvdQ	3-oxo-C12-homoserine lactone acylase PvdQ	-1.99	6.62917e-07			PA2385	-
pvdA	L-ornithine N5-oxygenase	-2.94	1.89647e-13			PA2386	-
fpvI	RNA polymerase sigma factor	-1.64	1.3723e-07			PA2387	-
fpvR	protein FpvR	-1.61	3.4828e-07			PA2388	+
pvdR	protein PvdR	-1.53	0.000950606			PA2389	+
pvdT	protein PvdT	-1.35	0.0124815			PA2390	+
opmQ	hypothetical protein	-1.63	0.00546872			PA2391	+
pvdP	protein PvdP	-1.91	9.58412e-07			PA2392	-
PA2393	dipeptidase	-2.4	4.32187e-12			PA2393	+
pvdN	protein PvdN	-1.5	0.00244127			PA2394	+
pvdF	pyoverdine synthetase F	-1.37	0.00346658			PA2396	-
pvdE	pyoverdine biosynthesis protein PvdE	-1.33	0.00364383			PA2397	+
fpvA	ferripyoverdine receptor	-2.01	2.95773e-13			PA2398	+
pvdD	pyoverdine synthetase D	-1.39	0.000141874			PA2399	-
bkdB	branched-chain alpha-keto acid dehydrogenase subunit E2	-1.24	0.0172632	6.82	0	PA2249	+
PA0264	hypothetical protein	-1.25	0.00625266	5.47	0	PA0264	-
PA2402	peptide synthase	-1.78	3.44325e-13			PA2402	-
PA2403	hypothetical protein	-1.24	0.0450581			PA2403	+
PA2404	hypothetical protein	-2.01	5.44896e-07			PA2404	+
PA2405	hypothetical protein	-1.79	0.00871777			PA2405	+
PA2406	hypothetical protein	-1.81	0.0164587			PA2406	+
PA2407	adhesion protein	-1.7	2.20452e-05			PA2407	+
PA2408	ABC transporter ATP-binding protein	-1.98	5.47863e-05			PA2408	+
PA2409	ABC transporter permease	-1.65	0.000201417			PA2409	+
PA2410	hypothetical protein	-2.03	5.50462e-15			PA2410	+
PA2411	thioesterase	-3.22	1.67188e-15			PA2411	-
PA2412	hypothetical protein	-2.39	0.000791686			PA2412	-
pvdH	diaminobutyrate--2-oxoglutarate aminotransferase	-1.76	0.000379797			PA2413	-
PA2418	hypothetical protein	-1.61	4.96613e-06			PA2418	+
braD	branched-chain amino acid ABC transporter	-1.26	0.0180372	4.88	0	PA1073	-
pvdS	extracytoplasmic-function sigma-70 factor	-1.65	0.00115724			PA2426	+
PA2430	hypothetical protein	1.58	0.0370845			PA2430	-
PA2450	hypothetical protein	-2.99	3.07606e-11			PA2450	-
PA2455	hypothetical protein	-1.37	0.00431657			PA2455	+
PA2456	hypothetical protein	-1.27	0.0033332			PA2456	+
PA2457	hypothetical protein	-1.37	0.0120214			PA2457	+
PA2458	hypothetical protein	-1.68	1.39886e-09			PA2458	+
PA2459	hypothetical protein	-2.06	1.19647e-21			PA2459	-
PA2460	hypothetical protein	-1.71	2.07358e-12			PA2460	-
PA2461	hypothetical protein	-1.26	0.00320596	3.64	0	PA2461	-
PA0661	hypothetical protein	-1.27	0.00971538	10.29	0	PA0661	-
purU1	formyltetrahydrofolate deformylase	-1.27	0.00542068	4.1	0	PA4314	-
PA2992	hypothetical protein	-1.28	0.0117675	7.19	0	PA2992	-
PA4349	hypothetical protein	-1.28	0.0351185	7.66	0	PA4349	-
PA2481	hypothetical protein	-1.43	0.0292426			PA2481	-
PA2486	hypothetical protein	-1.3	0.00990992			PA2486	+
mexT	transcriptional regulator MexT	1.35	0.00600366			PA2492	+
mexE	Resistance-Nodulation-cell Division (RND) multidrug efflux membrane fusion protein MexE precursor	1.49	5.4558e-05			PA2493	+
mexF	Resistance-Nodulation-cell Division (RND) multidrug efflux transporter MexF	1.48	5.95502e-07			PA2494	+
oprN	Multidrug efflux outer membrane protein OprN precursor	1.47	2.29337e-06			PA2495	+
PA2500	major facilitator superfamily (MFS) transporter	-1.43	0.00837487			PA2500	+
PA4126	major facilitator superfamily (MFS) transporter	-1.31	0.0393649	5.62	0	PA4126	+
PA2502	hypothetical protein	1.35	0.00371468			PA2502	-
PA2511	transcriptional regulator	-1.48	0.0397881			PA2511	-
antA	anthranilate dioxygenase large subunit	-1.74	1.21998e-06			PA2512	+
antB	anthranilate dioxygenase small subunit	-1.52	0.00405098			PA2513	+
PA2523	two-component response regulator	-1.6	7.19426e-05			PA2523	+
PA2544	hypothetical protein	-2.53	8.17674e-14			PA2544	-
xthA	exonuclease III	1.6	2.20738e-06			PA2545	+
PA2547	transcriptional regulator	-1.51	0.0125887			PA2547	+
foxA	Ferrioxamine receptor FoxA	-1.33	0.0233188	4.71	0	PA2466	-
PA2550	acyl-CoA dehydrogenase	-1.3	0.0132579			PA2550	-
PA2552	acyl-CoA dehydrogenase	-1.29	0.010884			PA2552	-
PA2553	acyl-CoA thiolase	-1.46	1.43558e-05			PA2553	-
PA2554	short-chain dehydrogenase	-1.69	0.000324278			PA2554	-
PA2555	AMP-binding protein	-1.42	0.000920495			PA2555	-
PA2557	AMP-binding protein	-1.26	0.0289511			PA2557	-
PA1887	hypothetical protein	-1.35	0.0359853	5.45	0	PA1887	-
PA2568	hypothetical protein	-1.44	0.00739318			PA2568	-
PA2569	hypothetical protein	1.28	0.00738329			PA2569	-
PA2572	two-component response regulator	1.81	2.04205e-10			PA2572	+
PA2573	chemotaxis transducer	1.66	1.41745e-05			PA2573	-
kynA	L-tryptophan:oxygen 2,3-oxidoreductase (decyclizing) KynA	1.46	1.46608e-05			PA2579	-
Gly_tRNA	Gly tRNA	1.66	0.019033			PA2583.1	-
pgsA	CDP-diacylglycerol--glycerol-3-phosphate 3-phosphatidyltransferase	1.31	0.0014699			PA2584	-
uvrC	excinuclease ABC subunit C	1.24	0.0198485			PA2585	-
pqsH	FAD-dependent monooxygenase	1.28	0.00677699			PA2587	-
PA2591	transcriptional regulator	-1.31	0.00250671			PA2591	-
PA2592	periplasmic spermidine/putrescine-binding protein	-1.33	0.00189899			PA2592	+
PA2600	hypothetical protein	-1.56	0.0204723			PA2600	-
PA2604	hypothetical protein	-1.51	7.33029e-07			PA2604	+
PA2618	arginyl-tRNA-protein transferase	1.47	1.31401e-05			PA2618	+
PA2621	hypothetical protein	1.21	0.0341277			PA2621	-
cspD	cold-shock protein CspD	1.43	0.010081			PA2622	+
idh	isocitrate dehydrogenase	-1.77	2.2075e-12			PA2624	+
trmU	tRNA-specific 2-thiouridylase MnmA	1.37	0.000590737			PA2626	+
purB	adenylosuccinate lyase	1.32	0.00410313			PA2629	+
aceA	isocitrate lyase	-1.44	0.000153165			PA2634	+
nuoA	NADH dehydrogenase subunit A	1.29	0.00246633			PA2637	+
PA2652	chemotaxis transducer	-1.73	3.91286e-09			PA2652	-
PA2654	chemotaxis transducer	-1.67	1.01255e-09			PA2654	+
PA2655	hypothetical protein	3.14	0.00131349			PA2655	-
PA2656	two-component sensor	1.79	3.07606e-11			PA2656	-
PA2657	two-component response regulator	1.65	2.83e-06			PA2657	-
PA2658	hypothetical protein	1.79	5.36153e-10			PA2658	-
PA2659	hypothetical protein	1.63	4.03151e-09			PA2659	-
PA2662	hypothetical protein	-1.84	5.92616e-08			PA2662	-
ppyR	psl and pyoverdine operon regulator, PpyR	-1.97	1.6276e-07			PA2663	-
PA2669	hypothetical protein	-1.38	0.0474402			PA2669	-
PA2670	hypothetical protein	-1.75	0.017383			PA2670	-
PA2674	type II secretion system protein	-1.71	0.0208184			PA2674	-
PA2676	type II secretion system protein	-1.44	0.0399941			PA2676	-
PA2679	hypothetical protein	-1.4	0.00881378			PA2679	-
PA2683	serine/threonine dehydratase	1.67	2.5395e-07			PA2683	-
PA2684	hypothetical protein	2.14	1.7245e-24			PA2684	-
PA3215	transcriptional regulator	-1.37	0.00191358	7.14	0	PA3215	-
PA2694	thioredoxin	1.48	0.028115			PA2694	-
PA2698	hydrolase	-1.58	3.47555e-05			PA2698	-
PA2744.1		1.55	0.0470912			PA2744.1	-
endA	DNA-specific endonuclease I	7.28	2.42019e-71			PA2749	+
PA2750	hypothetical protein	5.15	1.79106e-33			PA2750	+
PA2760	hypothetical protein	-1.33	0.0212197			PA2760	+
PA2761	hypothetical protein	-1.43	0.000763921			PA2761	+
PA2762	hypothetical protein	-1.59	0.00908586			PA2762	-
PA2768	hypothetical protein	1.47	0.0197194			PA2768	+
PA2769	hypothetical protein	1.4	0.0080483			PA2769	-
PA2770	hypothetical protein	1.39	0.00247142			PA2770	-
PA2771	hypothetical protein	1.25	0.0456686			PA2771	+
PA2772	hypothetical protein	1.51	0.00121584			PA2772	-
PA2773	hypothetical protein	1.54	0.00205347			PA2773	-
PA4606	hypothetical protein	-1.37	0.000228883	5.96	0	PA4606	-
PA2775	hypothetical protein	1.57	2.84195e-06			PA2775	-
PA2776	hypothetical protein	1.37	0.000208487			PA2776	+
PA2778	hypothetical protein	1.3	0.038114			PA2778	-
PA2779	hypothetical protein	1.3	0.00401302			PA2779	-
PA2780	hypothetical protein	1.24	0.0332057			PA2780	+
PA2788	chemotaxis transducer	-3.2	3.05275e-16			PA2788	-
PA0338	hypothetical protein	-1.38	0.00158078	5.64	0	PA0338	+
PA2800	hypothetical protein	1.34	0.000710521			PA2800	-
PA2801	hypothetical protein	1.35	0.00206597			PA2801	+
PA2802	transcriptional regulator	-1.49	0.000495857			PA2802	-
copS	two-component sensor, CopS	1.56	0.000783615			PA2810	+
PA2501	hypothetical protein	-1.38	8.21136e-05	2.78	0	PA2501	-
PA2813	glutathione S-transferase	1.26	0.00627245			PA2813	-
PA2817	hypothetical protein	1.51	3.5802e-05			PA2817	+
PA2819	hypothetical protein	2.48	2.23317e-09			PA2819	+
Gly_tRNA	Gly tRNA	2.38	2.56744e-07			PA2819.1	-
Gly_tRNA	Gly tRNA	2.12	6.26387e-19			PA2819.2	-
Glu_tRNA	Glu tRNA	1.83	1.67354e-13			PA2819.3	-
PA2820	hypothetical protein	-3.46	1.43246e-53			PA2820	+
PA2828	aminotransferase	1.27	0.0176069			PA2828	+
PA2840	ATP-dependent RNA helicase	1.69	2.4881e-05			PA2840	-
ohrR	OhrR	-1.36	0.0115349			PA2849	+
ohr	organic hydroperoxide resistance protein	4.38	2.16004e-14			PA2850	+
oprI	Outer membrane lipoprotein OprI precursor	1.64	0.0167962			PA2853	+
PA2855	hypothetical protein	1.41	0.00177004			PA2855	-
PA2860	hypothetical protein	1.42	0.00795748			PA2860	-
lipA	lactonizing lipase	-1.79	0.000196584			PA2862	+
lipH	lipase chaperone	-1.46	0.00810335			PA2863	+
PA2865	glycosylase	-1.23	0.0385996			PA2865	-
PA1473	hypothetical protein	-1.39	0.0443007	5.78	0	PA1473	-
PA2868	hypothetical protein	-2.38	4.77835e-12			PA2868	+
PA2869	hypothetical protein	1.96	5.00479e-11			PA2869	+
PA2870	hypothetical protein	1.43	0.00143872			PA2870	+
pscL	type III secretion system protein	-1.39	0.0183679	9.22	0	PA1725	+
PA2875	hypothetical protein	-1.67	7.83075e-05			PA2875	-
PA2879	transcriptional regulator	-1.26	0.0210092			PA2879	-
PA2880	hypothetical protein	-1.55	0.0111001			PA2880	+
PA1873	hypothetical protein	-1.39	0.0183649	4.97	0	PA1873	-
PA2895	hypothetical protein	1.3	0.0133108			PA2895	-
PA2901	hypothetical protein	1.25	0.0197237			PA2901	-
PA2914	ABC transporter permease	1.31	0.0345093			PA2914	+
hisJ	periplasmic histidine-binding protein HisJ	-1.61	0.0480429			PA2923	+
PA2927	hypothetical protein	3.67	1.27201e-28			PA2927	+
PA2928	hypothetical protein	7.06	2.73972e-75			PA2928	-
PA2933	major facilitator superfamily (MFS) transporter	2.03	0.000120747			PA2933	+
PA2935	hypothetical protein	-1.45	0.0225068			PA2935	-
PA2936	hypothetical protein	-1.72	0.0454829			PA2936	+
PA2939	aminopeptidase	3.93	1.19638e-50			PA2939	+
cobN	cobaltochelatase subunit CobN	1.29	0.00638878			PA2944	-
PA2945	hypothetical protein	1.3	0.0259933			PA2945	-
PA2946	hypothetical protein	1.38	0.0014543			PA2946	+
PA2947	hypothetical protein	1.48	0.0496438			PA2947	+
cobM	precorrin-3 methylase	1.37	0.0244052			PA2948	+
PA2949	lipase	1.4	0.00261827			PA2949	+
PA2955	hypothetical protein	-1.7	7.55005e-06			PA2955	-
PA2957	transcriptional regulator	1.27	0.00634286			PA2957	-
pilZ	type 4 fimbrial biogenesis protein PilZ	1.22	0.0225516			PA2960	-
PA2963	hypothetical protein	1.27	0.006346			PA2963	-
acpP	acyl carrier protein	1.56	7.3292e-09			PA2966	-
fabG	3-ketoacyl-ACP reductase	1.47	0.00138469			PA2967	-
PA0252	hypothetical protein	-1.4	0.0180541	6.2	0	PA0252	-
murB	UDP-N-acetylenolpyruvoylglucosamine reductase	1.27	0.0226441			PA2977	-
PA2982	hypothetical protein	-1.27	0.0487663			PA2982	-
PA2988	hypothetical protein	1.25	0.0136442			PA2988	-
PA2989	hypothetical protein	1.25	0.0289213			PA2989	+
PA0929	two-component response regulator	-1.4	0.0306231	2.64	0	PA0929	+
PA2993	hypothetical protein	-1.41	5.23436e-05			PA2993	-
nqrF	Na(+)-translocating NADH-quinone reductase subunit F	-1.73	6.01376e-12			PA2994	-
nqrE	Na(+)-translocating NADH-quinone reductase subunit E	-1.81	1.13612e-12			PA2995	-
nqrD	Na(+)-translocating NADH-quinone reductase subunit D	-1.62	0.000827687			PA2996	-
nqrC	Na(+)-translocating NADH-quinone reductase subunit C	-1.8	2.29605e-12			PA2997	-
nqrB	Na(+)-translocating NADH-quinone reductase subunit B	-1.69	0.00103878			PA2998	-
nqrA	Na(+)-translocating NADH-quinone reductase subunit A	-1.52	0.00372779			PA2999	-
aroP1	aromatic amino acid transporter AroP1	-1.22	0.0318087			PA3000	-
PA3001	glyceraldehyde-3-phosphate dehydrogenase	1.26	0.00677794			PA3001	-
foaB	3-ketoacyl-CoA thiolase	-1.27	0.00739318			PA3013	-
pvdJ	protein PvdJ	-1.4	0.000140193	3.72	0	PA2400	-
PA3020	lytic transglycosylase	-1.58	5.63325e-05			PA3020	+
PA3021	hypothetical protein	-1.77	2.25331e-09			PA3021	+
PA3024	carbohydrate kinase	-1.61	1.69534e-05			PA3024	-
PA3025	FAD-dependent glycerol-3-phosphate dehydrogenase	-1.93	5.67271e-09			PA3025	-
PA3026	hypothetical protein	-1.94	6.65286e-08			PA3026	-
PA3027	transcriptional regulator	-1.47	0.00177071			PA3027	+
moeA2	molybdenum cofactor biosynthesis protein A2	-1.34	0.00255654			PA3028	-
moaB2	molybdopterin biosynthetic protein B2	-1.3	0.0331807			PA3029	-
pvdJ	protein PvdJ	-1.4	0.000140193	5.12	0	PA2400	-
PA3038	porin	-1.48	5.7279e-07			PA3038	+
exoS	exoenzyme S	-1.4	0.000508974	13.17	0	PA3841	-
PA3041	hypothetical protein	1.37	0.00781642			PA3041	+
PA3045	two-component response regulator	-1.82	5.00824e-06			PA3045	-
PA3046	hypothetical protein	-1.26	0.0135898			PA3046	-
PA3048	23S rRNA m(2)G2445 methyltransferase	1.27	0.0103527			PA3048	-
pyrD	dihydroorotate dehydrogenase	1.92	1.3168e-05			PA3050	-
PA3053	hydrolytic enzyme	2.87	1.72568e-37			PA3053	+
PA3054	hypothetical protein	1.8	4.51204e-12			PA3054	+
pelG	protein PelG	1.4	0.000230102			PA3058	-
pelF	protein PelF	2.38	1.42672e-17			PA3059	-
pelE	protein PelE	3.74	1.22535e-21			PA3060	-
pelD	protein PelD	3.87	7.00553e-13			PA3061	-
pelC	protein PelC	6.13	4.34838e-27			PA3062	-
PA3039	transporter	-1.41	0.00337316	8.41	0	PA3039	-
pelA	PelA protein	4.86	6.25678e-69			PA3064	-
gdhB	NAD-dependent glutamate dehydrogenase	1.27	0.00459242			PA3068	-
PA3069	hypothetical protein	1.34	0.00459739			PA3069	-
PA3070	hypothetical protein	1.36	0.00127789			PA3070	+
PA3071	hypothetical protein	1.42	0.00246633			PA3071	+
PA3073	hypothetical protein	1.4	0.00497888			PA3073	+
PA3074	hypothetical protein	1.35	0.00145391			PA3074	+
PA3075	hypothetical protein	1.27	0.0366974			PA3075	+
PA3076	hypothetical protein	1.38	0.00722157			PA3076	+
PA3079	hypothetical protein	-1.9	1.49887e-16			PA3079	-
PA3080	hypothetical protein	-1.86	1.24357e-11			PA3080	-
PA3081	hypothetical protein	-2.16	4.07582e-11			PA3081	-
gbt	glycine betaine transmethylase	-1.87	2.25047e-15			PA3082	-
PA3085	hypothetical protein	1.31	0.0355589			PA3085	-
PA3086	hypothetical protein	1.23	0.0228212			PA3086	-
PA3089	hypothetical protein	1.52	0.0150253			PA3089	+
Asp_tRNA	Asp tRNA	1.34	0.038857			PA3094.1	-
xcpY	general secretion pathway protein L	1.77	1.3599e-12			PA3096	-
xcpX	general secretion pathway protein K	1.93	2.37482e-16			PA3097	-
xcpW	general secretion pathway protein J	2.06	4.0882e-16			PA3098	-
xcpV	general secretion pathway protein I	1.94	6.60056e-08			PA3099	-
xcpU	general secretion pathway outer membrane protein H precursor	2.14	6.4902e-19			PA3100	-
xcpT	general secretion pathway protein G	1.85	4.33577e-15			PA3101	-
xcpS	general secretion pathway protein F	1.81	5.21085e-13			PA3102	-
xcpR	general secretion pathway protein E	1.75	2.36043e-12			PA3103	-
putP	sodium/proline symporter PutP	-1.42	1.40946e-05	8.38	0	PA0783	+
PA3109	hypothetical protein	1.43	0.000645775			PA3109	-
PA3116	aspartate-semialdehyde dehydrogenase	1.3	0.00260713			PA3116	-
PA4392	hypothetical protein	-1.45	0.00395704	11.64	0	PA4392	+
PA3757	transcriptional regulator	-1.47	0.00109459	2.22	0	PA3757	+
PA3129	hypothetical protein	1.53	0.000238246			PA3129	-
Glu_tRNA	Glu tRNA	1.57	2.5313e-05			PA3133.3	-
Ala_tRNA	Ala tRNA	1.87	0.00750678			PA3133.4	-
PA3139	aromatic amino acid aminotransferase	1.3	0.00592385			PA3139	+
PA3144	hypothetical protein	1.28	0.00545475			PA3144	-
wbpL	glycosyltransferase WbpL	1.21	0.0217644			PA3145	-
wbpK	NAD-dependent epimerase/dehydratase	1.28	0.00397455			PA3146	-
glpQ	glycerophosphoryl diester phosphodiesterase, periplasmic	-1.49	0.00256604	4.21	0	PA0347	-
wbpI	UDP-N-acetylglucosamine 2-epimerase	1.22	0.0187563			PA3148	-
wbpH	glycosyltransferase WbpH	1.56	2.112e-09			PA3149	-
tadC	protein TadC	-1.5	0.00605287	6.5	0	PA4300	-
hisF2	imidazole glycerol phosphate synthase subunit HisF	1.26	0.00453324			PA3151	-
bifA	protein BifA	-1.53	3.13456e-07	3.33	0	PA4367	+
wzy	B-band O-antigen polymerase	1.21	0.0216243			PA3154	-
wzz	O-antigen chain length regulator	1.25	0.00459242			PA3160	-
gltS	glutamate/sodium ion symporter, GltS	-1.48	0.0283242			PA3176	+
PA3216	hypothetical protein	-1.55	0.00468508	7.75	0	PA3216	+
lpxO1	lipopolysaccharide biosynthetic protein LpxO1	-1.56	6.40123e-08	3.72	0	PA4512	+
PA3178	hypothetical protein	1.3	0.04745			PA3178	-
PA3179	hypothetical protein	1.5	2.22773e-05			PA3179	-
PA3181	keto-hydroxyglutarate-aldolase/keto-deoxy-phosphogluconate aldolase	-1.63	2.25578e-06			PA3181	-
pgl	6-phosphogluconolactonase	-1.52	2.16201e-05			PA3182	-
zwf	glucose-6-phosphate 1-dehydrogenase	-1.23	0.0330172			PA3183	-
PA3187	ABC transporter ATP-binding protein	-1.31	0.0184383			PA3187	-
PA3188	sugar ABC transporter permease	-1.21	0.0165115			PA3188	-
PA3189	ABC sugar transporter permease	-1.38	5.84096e-05			PA3189	-
pvdL	peptide synthase	-1.57	1.14183e-06	6.15	0	PA2424	-
gltR	two-component response regulator GltR	-1.24	0.0304049			PA3192	-
glk	glucokinase	-1.33	0.00102772			PA3193	-
edd	phosphogluconate dehydratase	-1.63	9.39044e-10			PA3194	-
gapA	glyceraldehyde 3-phosphate dehydrogenase	-1.25	0.0300533			PA3195	+
PA3198	hypothetical protein	-1.26	0.0330172			PA3198	-
PA3202	hypothetical protein	-1.25	0.0171654			PA3202	+
PA3211	ABC transporter permease	1.27	0.0113818			PA3211	+
PA3214	hypothetical protein	1.25	0.0264657			PA3214	+
exoT	exoenzyme T	-1.58	4.37026e-05	5.04	0	PA0044	+
pobA	4-hydroxybenzoate 3-monooxygenase	-1.6	0.0203271	6.53	0	PA0247	-
cyaB	protein CyaB	-2.61	3.86506e-18			PA3217	+
PA3222	hypothetical protein	-1.24	0.0415914			PA3222	+
PA3229	hypothetical protein	1.2	0.0360686			PA3229	+
PA3230	hypothetical protein	1.24	0.0299998			PA3230	-
PA3231	hypothetical protein	-1.73	2.2228e-06			PA3231	-
PA3232	DNA polymerase III subunit epsilon	-2.04	2.59618e-11			PA3232	-
PA3233	hypothetical protein	-2.92	2.00167e-38			PA3233	-
asd	aspartate-semialdehyde dehydrogenase	-1.6	4.43444e-08	3.19	0	PA3117	-
oprO	Pyrophosphate-specific outer membrane porin OprO precursor	-1.6	0.000274898	5.88	0	PA3280	-
PA3236	glycine betaine-binding protein	-1.83	1.61607e-07			PA3236	-
PA3241	hypothetical protein	1.26	0.00655438			PA3241	-
minC	septum formation inhibitor	4.92	5.02771e-68			PA3243	+
minD	cell division inhibitor MinD	2.31	1.17501e-29			PA3244	+
minE	cell division topological specificity factor MinE	2.16	2.90007e-10			PA3245	+
rluA	pseudouridine synthase	1.67	0.000121769			PA3246	+
PA3260	transcriptional regulator	-1.39	0.00019257			PA3260	-
PA3271	two-component sensor	-1.38	0.000124015			PA3271	+
PA3272	ATP-dependent DNA helicase	-1.25	0.0190021			PA3272	-
ppk	polyphosphate kinase	-1.6	6.29078e-10	2.08	0	PA5242	-
PA3277	short-chain dehydrogenase	-1.35	0.0194645			PA3277	-
PA3278	hypothetical protein	-6.64	1.38854e-33			PA3278	-
oprP	phosphate-specific outer membrane porin OprP precursor	-1.58	0.00272628			PA3279	-
lspA	lipoprotein signal peptidase	-1.61	2.07595e-06	4.34	0	PA4559	-
PA3283	hypothetical protein	-1.56	0.0144956			PA3283	-
PA3288	hypothetical protein	1.72	0.00143477			PA3288	-
PA3289	hypothetical protein	1.46	0.011084			PA3289	+
PA3295	HIT family protein	1.29	0.0216875			PA3295	-
phoA	alkaline phosphatase	-1.44	0.0487811			PA3296	+
phrS		1.44	0.000378543			PA3305.1	-
hepA	ATP-dependent helicase HepA	1.37	0.00255654			PA3308	+
PA4929	hypothetical protein	-1.61	4.12723e-05	5.19	0	PA4929	+
PA3315	ABC transporter permease	1.55	0.0198485			PA3315	+
PA3316	ABC transporter permease	1.76	4.72091e-08			PA3316	+
PA3320	hypothetical protein	-1.5	0.0401599			PA3320	-
PA3331	cytochrome P450	-1.46	0.0216776			PA3331	+
rfaD	ADP-L-glycero-D-manno-heptose-6-epimerase	-1.41	1.20161e-05			PA3337	-
PA0497	hypothetical protein	-1.62	2.49354e-08	2.34	0	PA0497	-
PA3341	transcriptional regulator	-1.88	5.50113e-11			PA3341	-
PA3342	hypothetical protein	-1.28	0.0178943			PA3342	-
PA3343	hypothetical protein	-1.41	0.000995892			PA3343	-
PA3345	hypothetical protein	1.26	0.0269188			PA3345	-
PA3346	two-component response regulator	-2.19	1.35025e-19			PA3346	-
PA3347	hypothetical protein	-3.1	8.07928e-27			PA3347	-
PA3348	chemotaxis protein methyltransferase	-2.02	1.35643e-16			PA3348	-
PA3349	chemotaxis protein	-3.44	4.83768e-18			PA3349	-
roxR	RoxR	-1.63	8.9045e-10	3.86	0	PA4493	-
flgM	protein FlgM	-1.4	0.00032996			PA3351	+
PA3352	hypothetical protein	-1.41	4.34639e-05			PA3352	+
PA4981	amino acid permease	-1.64	0.000710521	4.25	0	PA4981	-
PA3358	hypothetical protein	1.54	9.3127e-05			PA3358	+
amiL		1.31	0.00929821			PA3366.1	-
PA2873	hypothetical protein	-1.66	4.67877e-08	5.29	0	PA2873	-
PA3368	acetyltransferase	-1.54	0.0097771			PA3368	+
Arg_tRNA	Arg tRNA	-2.53	0.010884			PA3368.1	-
PA3383	phosphonate ABC transporter substrate-binding protein	-1.63	0.00722157			PA3383	-
prpC	methylcitrate synthase	-1.68	0.00780574	6.73	0	PA0795	-
nosZ	nitrous-oxide reductase	-1.67	0.00155118			PA3392	+
nosD	NosD protein	-1.36	0.0303894			PA3393	+
nosY	NosY protein	-1.5	0.0169951			PA3395	+
PA1107	hypothetical protein	-1.69	0.000117119	3.79	0	PA1107	-
PA0691	hypothetical protein	-1.7	0.0102498	6.57	0	PA0691	+
PA3402	hypothetical protein	-2.28	3.59761e-16			PA3402	-
PA3403	hypothetical protein	-1.4	0.00893858			PA3403	-
PA3412	hypothetical protein	-1.75	0.00548152			PA3412	-
PA3435	flavodoxin	-1.7	3.8834e-08	3.01	0	PA3435	-
ldh	leucine dehydrogenase	1.49	0.00146437			PA3418	-
PA3422	hypothetical protein	-1.31	0.0412806			PA3422	-
PA3424	hypothetical protein	2.62	3.44888e-20			PA3424	+
PA0039	hypothetical protein	-1.73	3.36524e-13	2.84	0	PA0039	+
PA3436	hypothetical protein	-1.62	0.0409892			PA3436	+
PA3440	hypothetical protein	-2.47	2.40772e-15			PA3440	+
PA3446	NAD(P)H-dependent FMN reductase	1.39	0.0179882			PA3446	-
PA3451	hypothetical protein	1.85	5.11502e-05			PA3451	+
mqoA	malate:quinone oxidoreductase	-1.34	0.0477372			PA3452	+
PA3472	hypothetical protein	1.55	1.82923e-06			PA3472	+
PA3473	hypothetical protein	1.45	0.000417716			PA3473	-
rhlI	autoinducer synthesis protein RhlI	-1.63	1.08383e-06			PA3476	-
PA3311	hypothetical protein	-1.75	9.28111e-07	5.19	0	PA3311	+
rhlB	rhamnosyltransferase chain B	-2.01	5.35387e-09			PA3478	-
rhlA	rhamnosyltransferase chain A	-2.03	0.000150929			PA3479	-
PA3480	deoxycytidine triphosphate deaminase	1.23	0.0351935			PA3480	-
PA3496	hypothetical protein	1.58	0.00780036			PA3496	+
PA3497	hypothetical protein	-1.35	0.0337326			PA3497	-
PA3502	hypothetical protein	-1.77	0.00546872			PA3502	-
PA3510	hypothetical protein	-1.51	0.00215723			PA3510	-
PA3512	ABC transporter permease	-1.46	0.0471046			PA3512	-
PA3513	hypothetical protein	-1.5	0.0334957			PA3513	-
PA3519	hypothetical protein	2.52	4.69909e-21			PA3519	-
aer	aerotaxis receptor Aer	-1.79	5.44896e-07	7.45	0	PA1561	-
PA3526	hypothetical protein	-1.98	1.34891e-12			PA3526	-
PA3535	serine protease	1.43	4.0543e-05			PA3535	+
PA3400	hypothetical protein	-1.87	1.58304e-08	8.37	0	PA3400	-
alg8	alginate biosynthesis protein Alg8	1.38	0.0033358			PA3541	+
alg44	alginate biosynthesis protein Alg44	1.47	0.00346714			PA3542	+
algE	Alginate production outer membrane protein AlgE	1.55	0.00346714			PA3544	+
algX	alginate biosynthesis protein AlgX	1.85	4.78867e-05			PA3546	+
algL	poly(beta-D-mannuronate) lyase	1.56	0.00306304			PA3547	+
algI	alginate o-acetyltransferase AlgI	-1.29	0.0375954			PA3548	+
algF	alginate o-acetyltransferase AlgF	1.89	1.2156e-05			PA3550	+
algA	phosphomannose isomerase / guanosine 5'-diphospho-D-mannose pyrophosphorylase	1.61	8.63883e-06			PA3551	+
arnB	UDP-4-amino-4-deoxy-L-arabinose--oxoglutarate aminotransferase	1.21	0.0397881			PA3552	+
PA3568	acetyl-coa synthetase	-2.19	2.20381e-07			PA3568	-
mmsB	3-hydroxyisobutyrate dehydrogenase	-2.75	5.88005e-11			PA3569	-
mmsA	methylmalonate-semialdehyde dehydrogenase	-2.73	4.52498e-12			PA3570	-
mmsR	transcriptional regulator MmsR	1.41	0.00393035			PA3571	+
erdR	response regulator ErdR	1.32	0.0231667			PA3604	-
potA	polyamine transporter PotA	1.44	0.00395973			PA3607	+
PA3611	hypothetical protein	-1.23	0.0323394			PA3611	+
fdxA	ferredoxin I	1.24	0.012557			PA3621	+
PA2548	hypothetical protein	-1.88	7.98601e-05	2.71	0	PA2548	+
PA3631	hypothetical protein	1.27	0.014661			PA3631	+
PA3632	hypothetical protein	1.27	0.0384825			PA3632	+
ygbP	2-C-methyl-D-erythritol 4-phosphate cytidylyltransferase	1.28	0.0152923			PA3633	-
pyrG	CTP synthetase	1.31	0.0114191			PA3637	-
accA	acetyl-CoA carboxylase carboxyltransferase subunit alpha	1.41	0.00289549			PA3639	-
lpxD	UDP-3-O-[3-hydroxymyristoyl] glucosamine N-acyltransferase	1.23	0.0211966			PA3646	-
PA2894	hypothetical protein	-1.88	5.42466e-09	9.66	0	PA2894	-
PA3649	hypothetical protein	1.28	0.00358617			PA3649	-
pyrH	uridylate kinase	1.33	0.0243383			PA3654	-
map	methionine aminopeptidase	1.21	0.0283923			PA3657	+
PA3661	hypothetical protein	-1.58	0.00391649			PA3661	+
PA2282	hypothetical protein	-1.89	5.37019e-07	6.83	0	PA2282	+
PA3668	hypothetical protein	1.28	0.040919			PA3668	+
PA3669	hypothetical protein	1.29	0.0144218			PA3669	-
PA3921	transcriptional regulator	-1.93	7.16389e-15	3.69	0	PA3921	-
PA3672	ABC transporter ATP-binding protein	1.35	0.0173672			PA3672	-
PA4639	hypothetical protein	-1.98	1.87094e-08	10.18	0	PA4639	-
PA3683	hypothetical protein	1.51	2.07418e-05			PA3683	-
adk	adenylate kinase	1.55	4.20016e-08			PA3686	-
ppc	phosphoenolpyruvate carboxylase	7.96	6.7088e-124			PA3687	-
PA1738	transcriptional regulator	-2	1.77603e-10	3.56	0	PA1738	-
lptF	Lipotoxon F, LptF	-6.36	7.59353e-102			PA3692	+
PA3697	hypothetical protein	1.28	0.00376597			PA3697	-
PA3698	hypothetical protein	1.23	0.0390723			PA3698	-
prfB	peptide chain release factor 1	1.31	0.00183101			PA3701	-
wspR	two-component response regulator	1.3	0.0031849			PA3702	-
wspF	chemotaxis-specific methylesterase	1.53	1.87426e-06			PA3703	-
wspE	chemotaxis sensor/effector fusion protein	1.45	8.461e-06			PA3704	-
wspD	hypothetical protein	1.67	3.72171e-09			PA3705	-
wspC	protein methyltransferase	1.7	3.56626e-09			PA3706	-
wspB	hypothetical protein	1.46	0.000968816			PA3707	-
PA3350	flagellar basal body P-ring biosynthesis protein FlgA	-2.01	2.05318e-20	2.37	0	PA3350	+
spdH	spermidine dehydrogenase, SpdH	-1.56	1.17568e-05			PA3713	+
PA3716	hypothetical protein	1.24	0.0195776			PA3716	-
PA3717	peptidyl-prolyl cis-trans isomerase, FkbP-type	-1.31	0.00721774			PA3717	+
PA3720	hypothetical protein	-2.24	3.75757e-10			PA3720	-
nalC	NalC	-1.67	2.83954e-08			PA3721	+
PA1668	hypothetical protein (DotU2 Type 6)	-2.04	4.86108e-07	6.17	0	PA1668	+
PA1668	hypothetical protein (DotU2 Type 6)	-2.04	4.86108e-07	4.91	0	PA1668	+
lasB	elastase LasB	-1.72	2.00269e-10			PA3724	-
PA3731	hypothetical protein	-1.24	0.0209357			PA3731	-
PA3732	hypothetical protein	-1.23	0.0331807			PA3732	-
PA1939	hypothetical protein (predicted OLD family endonuclease)	-2.07	2.65579e-22	3.96	0	PA1939	-
rimM	16S rRNA-processing protein RimM	1.38	0.000634416			PA3744	-
PA3019	ABC transporter ATP-binding protein	-2.09	1.00986e-08	7.55	0	PA3019	-
ffh	signal recognition particle protein Ffh	1.21	0.0422058			PA3746	-
PA3748	hypothetical protein	1.36	0.00127789			PA3748	+
purT	phosphoribosylglycinamide formyltransferase 2	-1.53	2.21212e-06			PA3751	-
PA3752	hypothetical protein	-1.48	0.00640711			PA3752	-
PA3753	hypothetical protein	-1.48	1.08554e-06			PA3753	-
PA3754	hypothetical protein	-1.46	0.00032996			PA3754	-
PA3755	hypothetical protein	1.25	0.0209182			PA3755	+
PA4980	enoyl-CoA hydratase	-2.09	3.31399e-09	17.74	0	PA4980	-
PA3758	N-acetylglucosamine-6-phosphate deacetylase	-1.5	0.00316906			PA3758	+
PA3759	aminotransferase	-1.39	0.0266498			PA3759	+
PA3764	transglycosylase	1.22	0.037208			PA3764	+
ygbB	2-C-methyl-D-erythritol 2,4-cyclodiphosphate synthase	-2.15	1.63679e-14	3.65	0	PA3627	-
guaB	inosine 5'-monophosphate dehydrogenase	1.25	0.0447018			PA3770	-
PA3786	hypothetical protein	1.42	6.67844e-05			PA3786	-
PA3787	hypothetical protein	1.27	0.019759			PA3787	+
PA3793	hypothetical protein	1.34	0.006498			PA3793	-
PA3797	hypothetical protein	1.22	0.0279008			PA3797	-
PA3808	hypothetical protein	-1.29	0.0080746			PA3808	-
fdx2	(2Fe-2S) ferredoxin	-1.37	0.0123111			PA3809	-
hscA	chaperone protein HscA	-1.38	5.471e-05			PA3810	-
iscA	iron-binding protein IscA	-1.31	0.00385374			PA3812	-
mucR	MucR	-2.16	5.00708e-14	2.72	0	PA1727	-
queA	S-adenosylmethionine--tRNA ribosyltransferase-isomerase	1.38	0.0013449			PA3824	-
PA3340	hypothetical protein (43% similar to FimV)	-2.25	5.61203e-22	2.48	0	PA3340	-
PA3826	hypothetical protein	1.29	0.0202241			PA3826	+
PA3828	hypothetical protein	1.29	0.00227008			PA3828	-
PA3833	hypothetical protein	1.29	0.0162255			PA3833	+
PA3835	hypothetical protein	-1.29	0.0325796			PA3835	-
phzA1	phenazine biosynthesis protein	-2.29	0.00308248	2.23	0	PA4210	+
PA3842	chaperone	-1.54	0.00397455			PA3842	+
PA3848	hypothetical protein	1.23	0.0316738			PA3848	+
PA3853	transferase	1.23	0.0487663			PA3853	-
PA4331	hypothetical protein (probable ferredoxin reductase)	-2.29	2.20798e-14	5.24	0	PA4331	-
PA3855	hypothetical protein	1.27	0.0223931			PA3855	-
PA3858	amino acid-binding protein	1.34	0.000936791			PA3858	-
PA3860	AMP-binding protein	-1.46	0.004227			PA3860	-
rhl	ATP-dependent RNA helicase RhlB	-2.18	1.17232e-25			PA3861	+
moaA1	molybdenum cofactor biosynthesis protein A	-1.56	0.00505333			PA3870	-
PA3871	peptidyl-prolyl cis-trans isomerase, PpiC-type	-1.74	0.00146437			PA3871	-
narI	respiratory nitrate reductase subunit gamma	-1.63	0.00068432			PA3872	-
narH	respiratory nitrate reductase subunit beta	-1.51	9.64199e-06			PA3874	-
narG	respiratory nitrate reductase subunit alpha	-1.28	0.00523366			PA3875	-
narK1	nitrite extrusion protein 1	1.56	9.02905e-09			PA3877	-
nhaP	Na+/H+ antiporter NhaP	-1.34	0.00397455			PA3887	-
PA3888	ABC transporter permease	-1.77	8.46318e-06			PA3888	+
PA3889	ABC transporter	-2.34	2.85099e-11			PA3889	+
PA3890	ABC transporter permease	-2	1.40793e-05			PA3890	+
PA3891	ABC transporter ATP-binding protein	-2.43	6.86492e-11			PA3891	+
fecA	Fe(III) dicitrate transporter FecA	-1.72	1.15236e-10			PA3901	+
prfC	peptide chain release factor 3	1.33	0.00206899			PA3903	+
PA3904	hypothetical protein	-1.41	0.0146971			PA3904	+
PA3905	hypothetical protein	-1.72	4.40135e-07			PA3905	+
PA3906	hypothetical protein	-1.75	0.000345943			PA3906	+
PA3907	hypothetical protein	-1.78	1.79888e-11			PA3907	+
PA3908	hypothetical protein	-2.04	1.26349e-10			PA3908	+
PA3911	hypothetical protein	-2.67	1.57858e-10			PA3911	-
PA3912	hypothetical protein	-2.23	1.2016e-09			PA3912	-
PA3913	protease	-2.23	3.88341e-09			PA3913	-
moaE	molybdopterin converting factor, large subunit	1.47	5.31814e-05			PA3916	-
moaD	molybdopterin converting factor, small subunit	1.42	0.00156339			PA3917	-
PA3920	metal transporting P-type ATPase	1.52	0.000151732			PA3920	+
fliF	flagellar MS-ring protein	-2.38	7.15784e-13	5.49	0	PA1101	+
PA3922	hypothetical protein	-2.87	9.72767e-12			PA3922	-
PA3923	hypothetical protein	-3.12	3.05277e-21			PA3923	-
PA3924	long-chain-fatty-acid--CoA ligase	-2.37	3.2308e-09			PA3924	-
PA3401	hypothetical protein (predicted ABC-type multidrug transport system, permease component)	-2.41	1.38016e-12	8.88	0	PA3401	-
PA3945	hypothetical protein	1.24	0.0191999			PA3945	-
rocS1	two-component sensor	-1.49	0.000279443			PA3946	-
PA2567	hypothetical protein (predicted phosphodiesterase EAL)	-2.5	1.10086e-31	3.63	0	PA2567	+
PA3954	hypothetical protein	-1.48	0.00357333			PA3954	+
PA3958	hypothetical protein	1.34	0.00383595			PA3958	+
thiD	phosphomethylpyrimidine kinase	1.32	0.00627336			PA3975	+
PA3978	hypothetical protein	1.24	0.01797			PA3978	+
PA3979	hypothetical protein	1.43	4.224e-05			PA3979	-
PA3980	(dimethylallyl)adenosine tRNA methylthiotransferase	1.3	0.00869575			PA3980	+
lnt	apolipoprotein N-acyltransferase	-1.7	1.10191e-09			PA3984	+
PA3986	hypothetical protein	1.54	0.000219712			PA3986	-
holA	DNA polymerase III subunit delta	1.28	0.0110316			PA3989	+
pbpA	penicillin-binding protein 2	1.21	0.0479505			PA4003	-
PA4015	hypothetical protein	1.21	0.0446152			PA4015	+
PA4016	hypothetical protein	1.2	0.0385464			PA4016	+
PA4026	acetyltransferase	-2.4	1.28846e-18			PA4026	+
PA4027	hypothetical protein	-1.51	0.000960491			PA4027	+
PA4029	hypothetical protein	-1.78	7.18209e-09			PA4029	+
PA4030	hypothetical protein	-1.64	1.96547e-06			PA4030	+
ppa	inorganic pyrophosphatase	1.26	0.00920734			PA4031	+
PA1088	hypothetical protein (Predicted magnesium protoporphyrin IX methyltransferase activity)	-2.56	1.43015e-27	4.94	0	PA1088	+
aqpZ	aquaporin Z	-1.67	0.00189009			PA4034	+
xseB	exodeoxyribonuclease VII small subunit	1.42	0.000643446			PA4042	+
ribA	GTP cyclohydrolase II	1.29	0.0146971			PA4047	-
ribB	bifunctional 3,4-dihydroxy-2-butanone 4-phosphate synthase/GTP cyclohydrolase II-like protein	-1.45	0.00552351			PA4054	-
ribC	riboflavin synthase subunit alpha	-1.71	6.50717e-08			PA4055	-
PA4058	hypothetical protein	1.67	1.56682e-05			PA4058	+
PA4059	hypothetical protein	1.75	0.000718813			PA4059	+
PA4060	hypothetical protein	1.52	0.00960632			PA4060	+
PA4061	thioredoxin	1.23	0.0425362			PA4061	+
PA4063	hypothetical protein	1.29	0.0141454			PA4063	+
oprG	Outer membrane protein OprG precursor	1.25	0.0420034			PA4067	+
PA4068	epimerase	1.3	0.00578045			PA4068	-
PA4069	hypothetical protein	1.21	0.0454687			PA4069	-
PA4070	FeaR family transcriptional regulator	-1.4	0.0118244			PA4070	-
PA4080	response regulator	1.37	0.000491881			PA4080	-
cupB5	adhesive protein CupB5	-1.46	0.0126388			PA4082	-
cupB2	chaperone CupB2	-1.69	0.00102188			PA4085	-
PA4107	hypothetical protein	-1.64	0.0327085			PA4107	-
ampC	beta-lactamase	1.69	2.74999e-08			PA4110	+
PA4112	sensor/response regulator hybrid	2.01	3.59288e-17			PA4112	-
PA4113	sugar efflux transporter	1.51	7.10264e-05			PA4113	-
bphO	heme oxygenase, BphO	1.22	0.0412806			PA4116	+
PA4118	hypothetical protein	1.53	0.000198718			PA4118	+
PA4121	hypothetical protein	-1.54	0.0301587			PA4121	+
PA4122	hypothetical protein	-1.42	0.0339914			PA4122	+
PA0472	RNA polymerase sigma factor FiuI, sigma 24 homolog	-2.61	2.38036e-06	2.64	0	PA0472	-
PA4131	iron-sulfur protein	1.67	1.64312e-06			PA4131	+
PA4132	hypothetical protein	1.47	4.26367e-06			PA4132	+
PA4135	transcriptional regulator	1.26	0.0404166			PA4135	-
PA4139	hypothetical protein	-2.46	5.76633e-13			PA4139	+
PA4140	hypothetical protein	-1.65	0.000208487			PA4140	+
PA4141	hypothetical protein	-1.3	0.00130806			PA4141	+
PA4142	secretion protein	-1.6	0.00472385			PA4142	+
PA4143	toxin transporter	-1.35	0.0458582			PA4143	+
acoR	transcriptional regulator AcoR	-1.47	0.0207716			PA4147	-
PA4150	dehydrogenase E1 component	-1.45	0.0018103			PA4150	+
acoB	acetoin catabolism protein AcoB	-1.39	0.00660694			PA4151	+
PA4520	chemotaxis transducer	-2.61	4.12133e-33	3.51	0	PA4520	-
PA4156	TonB-dependent receptor	-1.47	0.0390885			PA4156	-
fepC	ferric enterobactin transporter FepC	1.61	0.00144355			PA4158	-
fpvB	second ferric pyoverdine receptor FpvB	-1.45	0.000375233			PA4168	+
PA4170	hypothetical protein	-1.37	0.0396291			PA4170	+
PA4172	nuclease	-1.72	0.0310423			PA4172	+
PA4739	hypothetical protein (predicted periplasmic or secreted lipoprotein)	-2.68	0.018992	2.15	0	PA4739	-
PA4182	hypothetical protein	-1.31	0.0195891			PA4182	+
PA4187	major facilitator superfamily (MFS) transporter	-1.47	0.0110237			PA4187	+
PA4194	ABC transporter permease	-1.6	0.00928736			PA4194	-
PA4198	acyl-CoA synthetase	-1.42	0.000227894			PA4198	+
ppgL	periplasmic gluconolactonase, PpgL	-1.4	0.00193127			PA4204	+
phzM	phenazine-specific methyltransferase	-1.64	0.00241028			PA4209	-
PA0494	acetyl-CoA carboxylase biotin carboxylase subunit	-2.73	2.99749e-11	8.98	0	PA0494	+
phzB1	phenazine biosynthesis protein	-1.9	0.000105535			PA4211	+
phzS	hypothetical protein	-1.57	0.00305004			PA4217	+
PA4218	transporter	-7.38	6.50435e-47			PA4218	-
PA4219	hypothetical protein	-3.05	3.68764e-09			PA4219	-
PA4220	hypothetical protein	-3.05	6.31975e-07			PA4220	-
fptA	Fe(III)-pyochelin outer membrane receptor	-5.44	2.25685e-47			PA4221	-
PA3353	hypothetical protein (predicted c-di-GMP binding protein)	-2.73	8.93206e-29	4.04	0	PA3353	+
PA4223	ABC transporter ATP-binding protein	-3.54	4.31056e-20			PA4223	-
PA4033	hypothetical protein MucE	-2.75	2.03061e-10	5.32	0	PA4033	+
pchF	pyochelin synthetase	-5.09	5.38286e-51			PA4225	-
pchE	dihydroaeruginoic acid synthetase	-4.02	1.06736e-46			PA4226	-
pchR	transcriptional regulator PchR	-2.54	1.02805e-07			PA4227	-
pchD	pyochelin biosynthesis protein PchD	-4.25	1.16969e-32			PA4228	+
pchC	pyochelin biosynthetic protein PchC	-8.91	2.03882e-56			PA4229	+
pchB	isochorismate-pyruvate lyase	-5.9	1.38102e-32			PA4230	+
pchA	salicylate biosynthesis isochorismate synthase	-4.17	4.71579e-36			PA4231	+
PA4233	major facilitator superfamily (MFS) transporter	1.22	0.0387734			PA4233	-
bfrA	bacterioferritin	1.28	0.0322393			PA4235	-
katA	catalase	1.39	2.16201e-05			PA4236	-
rpmJ	50S ribosomal protein L36	1.45	0.00380332			PA4242	-
rpsH	30S ribosomal protein S8	1.27	0.0171019			PA4249	-
nusG	transcription antitermination protein NusG	1.29	0.00250735			PA4275	-
PA1664	hypothetical protein OrfX (secreted by Type 6)	-2.86	0.00114965	5.77	0	PA1664	+
tufB	elongation factor Tu	1.35	0.00178276			PA4277	-
PA1331	hypothetical protein (70% similar to YegH of E. coli)	-2.88	2.9128e-30	5.57	0	PA1331	-
Gly_tRNA	Gly tRNA	1.58	5.87969e-06			PA4277.2	-
Tyr_tRNA	Tyr tRNA	1.76	5.29093e-14			PA4277.3	-
PA4289	transporter	-1.54	1.31004e-05			PA4289	+
PA4290	chemotaxis transducer	-1.57	0.00242449			PA4290	-
PA4291	hypothetical protein	1.58	1.18871e-06			PA4291	+
rhlR	transcriptional regulator RhlR	-2.88	2.99439e-42	2.89	0	PA3477	-
PA4294	hypothetical protein	-1.66	0.00157601			PA4294	-
fppA	Flp prepilin peptidase A, FppA	-1.7	2.13465e-07			PA4295	+
pprB	two-component response regulator, PprB	-2.41	4.1598e-27			PA4296	+
tadG	protein TadG	-1.3	0.0095311			PA4297	-
PA3413	hypothetical protein (predicted SOS response gene)	-2.9	1.77228e-40	3.3	0	PA3413	+
rcpA	protein RcpA	-1.48	0.00750678			PA4304	-
PA3951	hypothetical protein (no prediction)	-2.91	3.00999e-20	3.72	0	PA3951	-
PA1340	amino acid ABC transporter membrane protein	-3.01	8.48981e-20	5.87	0	PA1340	-
pctA	chemotactic transducer PctA	-2.09	6.16513e-18			PA4309	+
pctB	chemotactic transducer PctB	-2.2	4.03155e-12			PA4310	+
PA3367	hypothetical protein (contains type 1 export signal)	-3.02	8.04541e-11	3.17	0	PA3367	+
PA4844	chemotaxis transducer	-3.1	8.00688e-26	4.69	0	PA4844	+
flgE	flagellar hook protein FlgE	-3.12	4.51266e-47	4.89	0	PA1080	+
PA4326	hypothetical protein	-2.22	1.74938e-17			PA4326	-
flp	type IVb pilin, Flp	-3.17	0.000570839	7.12	0	PA4306	+
PA4332	hypothetical protein	-2.57	4.01999e-28			PA4332	-
PA4340	hypothetical protein	1.23	0.0438891			PA4340	-
PA4347	hypothetical protein	1.31	0.0116651			PA4347	-
PA4348	hypothetical protein	1.18	0.0446152			PA4348	-
PA4683	hypothetical protein (no prediction)	-3.32	1.1575e-49	4.87	0	PA4683	-
PA4350	hypothetical protein	1.56	0.000578687			PA4350	+
PA4354	hypothetical protein	1.32	0.00291773			PA4354	+
xenB	xenobiotic reductase	1.33	0.000541249			PA4356	+
PA4361	oxidoreductase	-1.56	3.85622e-06			PA4361	-
PA4364	hypothetical protein	1.68	0.0209869			PA4364	+
PA4683	hypothetical protein (no prediction)	-3.32	1.1575e-49	3.9	0	PA4683	-
PA4368	hypothetical protein	-3.32	1.19896e-27			PA4368	-
PA4369	hypothetical protein	-5.61	2.18572e-47			PA4369	-
icmP	Insulin-cleaving metalloproteinase outer membrane protein	-1.56	0.00036421			PA4370	+
PA4374	Resistance-Nodulation-cell Division (RND) efflux membrane fusion protein	1.3	0.00468508			PA4374	+
PA4375	multidrug efflux protein	1.25	0.00840617			PA4375	+
PA4377	hypothetical protein	1.69	6.67593e-06			PA4377	-
inaA	InaA protein	1.38	0.00023003			PA4378	-
PA4379	hypothetical protein	1.41	0.000184107			PA4379	-
PA4383	camphor resistance protein CrcB	-1.56	0.0203204			PA4383	-
exsC	exoenzyme S synthesis protein C	-3.38	5.86493e-16	2.64	0	PA1710	+
pctC	chemotactic transducer PctC	-3.47	4.75612e-31	10.67	0	PA4307	+
PA2462	hypothetical protein (contains type 1 export signal)	-3.75	4.38125e-72	4.89	0	PA2462	-
rnpB		1.36	0.000112575			PA4421.1	+
PA4423	hypothetical protein	3.41	2.68469e-60			PA4423	+
PA4424	hypothetical protein	2.48	5.69178e-29			PA4424	+
PA4425	phosphoheptose isomerase	1.92	5.22783e-18			PA4425	+
PA4426	hypothetical protein	1.63	5.09255e-10			PA4426	+
sspB	ClpXP protease specificity-enhancing factor	-1.31	0.0028684			PA4427	-
sspA	stringent starvation protein A	-1.51	1.61212e-05			PA4428	-
PA4429	cytochrome C1 precursor	-1.92	1.86909e-06			PA4429	-
PA4430	cytochrome b	-2.1	8.55764e-11			PA4430	-
PA4431	iron-sulfur protein	-1.67	1.23126e-07			PA4431	-
PA4438	hypothetical protein	-2.02	4.86309e-15			PA4438	-
mltB1	murein hydrolase B	-2.76	2.46131e-27			PA4444	+
PA4445	hypothetical protein	-1.57	1.7237e-05			PA4445	-
hisG	ATP phosphoribosyltransferase	-1.23	0.0337062			PA4449	-
murA	UDP-N-acetylglucosamine 1-carboxyvinyltransferase	-1.19	0.0390723			PA4450	-
PA4452	hypothetical protein	1.35	0.000312517			PA4452	-
PA4453	hypothetical protein	1.2	0.0451216			PA4453	-
PA4454	hypothetical protein	1.34	0.0370321			PA4454	-
PA4455	ABC transporter permease	1.32	0.00782083			PA4455	-
PA4456	ABC transporter ATP-binding protein	1.25	0.0148939			PA4456	-
PA4457	arabinose-5-phosphate isomerase KdsD	1.24	0.0190844			PA4457	+
PA4461	ABC transporter ATP-binding protein	1.26	0.00972015			PA4461	+
PA4469	hypothetical protein	-1.47	0.0487663			PA4469	-
fumC1	fumarate hydratase	-1.28	0.0446152			PA4470	-
PA4473	hypothetical protein	1.26	0.015495			PA4473	+
PA4476	hypothetical protein	1.25	0.00837443			PA4476	-
PA4478	Maf-like protein	1.26	0.0115881			PA4478	-
mreD	rod shape-determining protein MreD	1.39	0.00264791			PA4479	-
mreC	rod shape-determining protein MreC	1.8	1.18379e-08			PA4480	-
mreB	rod shape-determining protein MreB	1.96	1.24866e-13			PA4481	-
gatC	aspartyl/glutamyl-tRNA amidotransferase subunit C	-1.26	0.0243489			PA4482	+
gatA	aspartyl/glutamyl-tRNA amidotransferase subunit A	-1.5	0.00556507			PA4483	+
gatB	aspartyl/glutamyl-tRNA amidotransferase subunit B	-1.54	1.66071e-05			PA4484	+
PA2462	hypothetical protein (contains type 1 export signal)	-3.75	4.38125e-72	4.61	0	PA2462	-
PA4490	hypothetical protein	1.33	0.0176087			PA4490	-
PA1199	lipoprotein	-4.04	6.38932e-66	4.33	0	PA1199	+
PA4498	metallopeptidase	-1.25	0.00815103			PA4498	-
PA4500	ABC transporter	-2.03	8.5651e-22			PA4500	+
opdP	glycine-glutamate dipeptide porin OpdP	-1.9	2.79764e-15			PA4501	+
PA4502	ABC transporter	-1.59	5.11202e-08			PA4502	+
PA4503	ABC transporter permease	-1.38	0.00112223			PA4503	+
PA4504	ABC transporter permease	-1.57	5.78953e-07			PA4504	+
PA4505	ABC transporter ATP-binding protein	-1.47	3.0719e-06			PA4505	+
PA4506	peptide ABC transporter ATP-binding protein	-1.42	9.38353e-05			PA4506	+
flgG	flagellar basal body rod protein FlgG	-4.25	9.73496e-72	3.47	0	PA1082	+
PA0938	hypothetical protein (predicted exopolysaccharide chain length determinant protein)	-4.43	9.68553e-83	3.53	0	PA0938	+
PA1680	hypothetical protein (predicted 3-oxoadipate enol-lactonase activity)	-4.56	3.01446e-18	6.48	0	PA1680	-
PA4324	hypothetical protein (predicted PilZ domain)	-4.75	9.73603e-33	4.77	0	PA4324	-
pilC	type 4 fimbrial biogenesis protein PilC	-1.34	0.000207916			PA4527	+
PA4531	hypothetical protein	1.22	0.0322584			PA4531	-
PA4532	hypothetical protein	1.21	0.0438891			PA4532	-
PA4535	hypothetical protein	1.63	0.00815103			PA4535	+
PA4536	hypothetical protein	1.24	0.037208			PA4536	+
PA4540	hypothetical protein	-2.11	0.0320479			PA4540	+
Pro_tRNA	Pro tRNA	1.74	4.64921e-05			PA4541.2	-
Asn_tRNA	Asn tRNA	1.7	1.82341e-07			PA4541.3	-
comL	competence protein ComL	1.54	2.96457e-08			PA4545	+
pilV	type 4 fimbrial biogenesis protein PilV	-1.29	0.00654261			PA4551	+
pilW	type 4 fimbrial biogenesis protein PilW	-1.27	0.0124232			PA4552	+
lytB	4-hydroxy-3-methylbut-2-enyl diphosphate reductase	-1.38	0.000637096			PA4557	-
PA4558	peptidyl-prolyl cis-trans isomerase, FkbP-type	-1.62	5.95404e-08			PA4558	-
PA1941	hypothetical protein (no prediction)	-4.87	3.26496e-34	3.28	0	PA1941	-
ileS	isoleucyl-tRNA synthetase	-1.53	2.38377e-08			PA4560	-
ribF	bifunctional riboflavin kinase/FMN adenylyltransferase	-1.29	0.0266498			PA4561	-
rpsT	30S ribosomal protein S20	1.94	1.87508e-18			PA4563	+
ispB	octaprenyl-diphosphate synthase	1.29	0.00506538			PA4569	+
PA4573	hypothetical protein	1.39	0.00534279			PA4573	-
PA4574	hypothetical protein	1.71	3.70547e-08			PA4574	-
PA4578	hypothetical protein	1.26	0.00570451			PA4578	+
ccpR	cytochrome C551 peroxidase precursor	1.3	0.0270779			PA4587	+
PA4589	hypothetical protein	-1.39	0.0167182			PA4589	-
PA4596	transcriptional regulator	-1.26	0.0336562			PA4596	+
morA	motility regulator	-4.45	1.23865e-76			PA4601	+
glyA3	serine hydroxymethyltransferase	-1.87	0.000346871			PA4602	+
PA4604	hypothetical protein	-1.28	0.00921703			PA4604	-
PA1656	hypothetical protein HsiA2 (predicted type 6)	-4.93	2.9683e-29	2.46	0	PA1656	+
PA4607	hypothetical protein	1.58	9.39589e-07			PA4607	-
PA4610	hypothetical protein	-1.48	1.66071e-05			PA4610	+
PA4611	hypothetical protein	1.64	5.99754e-11			PA4611	-
katB	catalase	-1.33	0.00232488			PA4613	-
PA4616	c4-dicarboxylate-binding protein	-1.3	0.0256359			PA4616	-
PA4624	hypothetical protein	2.54	3.32917e-31			PA4624	-
PA3722	hypothetical protein (no prediction)	-5.11	3.0045e-35	3.3	0	PA3722	-
PA0038	hypothetical protein (no prediction)	-5.12	2.14362e-59	7.13	0	PA0038	+
PA4632	hypothetical protein	1.45	1.47694e-05			PA4632	-
PA4633	chemotaxis transducer	-2.13	4.37343e-21			PA4633	+
PA4636	hypothetical protein	1.43	5.471e-05			PA4636	+
PA4637	hypothetical protein	1.75	1.15254e-07			PA4637	-
PA4638	hypothetical protein	3.13	1.21026e-23			PA4638	-
PA1657	hypothetical protein HsiB2 (predicted type 6)	-5.31	3.58552e-44	3.72	0	PA1657	+
PA4641	High homology to Eschericha coli PhnB	1.46	0.00703063			PA4641	-
PA4645	hypoxanthine-guanine phosphoribosyltransferase	1.35	0.0118647			PA4645	-
upp	uracil phosphoribosyltransferase	1.25	0.0407037			PA4646	+
uraA	uracil permease	1.28	0.00975942			PA4647	+
hemH	ferrochelatase	-1.3	0.0496327			PA4655	-
pagL	lipid A 3-O-deacylase	-1.21	0.0347911			PA4661	-
moeB	molybdopterin biosynthesis protein MoeB	1.25	0.0409219			PA4663	-
prfA	peptide chain release factor 1	1.24	0.0299574			PA4665	-
hemA	glutamyl-tRNA reductase	1.33	0.0017032			PA4666	-
PA4667	hypothetical protein	-1.73	2.27959e-12			PA4667	+
PA4668	molecular chaperone LolB	-1.99	8.27477e-14			PA4668	+
ipk	4-diphosphocytidyl-2-C-methyl-D-erythritol kinase	1.43	3.84784e-06			PA4669	+
Gln_tRNA	Gln tRNA	1.85	1.56847e-07			PA4669.1	+
prs	ribose-phosphate pyrophosphokinase	1.4	0.0349987			PA4670	+
PA4673	GTP-dependent nucleic acid-binding protein EngD	1.25	0.0407451			PA4673	+
PA4675	TonB-dependent receptor	-1.48	0.00410313			PA4675	+
PA0045	hypothetical protein (predicted curli formation function)	-5.59	9.11583e-40	2.53	0	PA0045	+
PA4679	hypothetical protein	1.27	0.0454829			PA4679	-
PA5167	c4-dicarboxylate-binding protein	-5.93	3.66501e-62	4.56	0	PA5167	+
PA0172	hypothetical protein SiaA	-6.59	1.69314e-35	11.93	0	PA0172	-
PA4684	hypothetical protein	1.51	0.000470682			PA4684	+
PA4692	sulfite oxidase subunit YedY	-1.71	1.27371e-09			PA4692	-
pssA	phosphatidylserine synthase	-1.22	0.0262249			PA4693	-
PA4697	hypothetical protein	-1.25	0.0279284			PA4697	+
phuT	Heme-transporter, PhuT	-1.59	0.0340692			PA4708	-
PA4709	hemin degrading factor	-1.43	0.00467954			PA4709	-
phuR	heme/hemoglobin uptake outer membrane receptor PhuR	-1.54	1.19703e-05			PA4710	+
PA4713	hypothetical protein	1.29	0.0187215			PA4713	-
PA4716	hypothetical protein	1.25	0.0161274			PA4716	+
trmA	tRNA (uracil-5-)-methyltransferase	1.63	5.44809e-05			PA4720	+
PA4722	hypothetical protein	1.3	0.00508512			PA4722	-
dksA	suppressor protein DksA	1.33	0.000582674			PA4723	+
crcZ		1.5	1.89953e-07			PA4726.11	+
PA4726.2		1.33	0.000875317			PA4726.2	-
panB	3-methyl-2-oxobutanoate hydroxymethyltransferase	-1.53	1.43055e-05			PA4729	+
panC	pantoate--beta-alanine ligase	-1.45	0.000129525			PA4730	+
PA4735	hypothetical protein	1.21	0.0252569			PA4735	+
PA4736	hypothetical protein	1.32	0.00180499			PA4736	+
PA4738	hypothetical protein	-2.82	3.62009e-05			PA4738	-
PA0179	two-component response regulator (predicted CheY-like receiver domain and winged-helix DNA-binding domain)	-7.05	1.29764e-38	2.32	0	PA0179	-
rpsO	30S ribosomal protein S15	1.37	0.00111517			PA4741	-
PA4746	hypothetical protein	1.41	0.000103535			PA4746	-
Leu_tRNA	Leu tRNA	1.21	0.020481			PA4746.2	-
secG	preprotein translocase subunit SecG	1.5	3.00345e-07			PA4747	-
pchG	pyochelin biosynthetic protein PchG	-7.13	2.65769e-20	13.6	0	PA4224	-
PA4753	hypothetical protein	1.5	8.54799e-07			PA4753	+
fur	ferric uptake regulation protein	1.22	0.0169059			PA4764	-
omlA	Outer membrane lipoprotein OmlA precursor	1.28	0.0111874			PA4765	+
smpB	SsrA-binding protein	1.44	3.45871e-05			PA4768	+
lldP	L-lactate permease	-1.37	0.000648253			PA4770	+
PA4773	hypothetical protein	1.25	0.0310843			PA4773	+
PA4775	hypothetical protein	1.23	0.0470912			PA4775	+
cueR	protein CueR	1.22	0.0310958			PA4778	+
PA4781	cyclic di-GMP phosphodiesterase	1.52	0.000422507			PA4781	-
PA4782	hypothetical protein	1.36	0.00391649			PA4782	-
PA4789	hypothetical protein	1.61	0.00584134			PA4789	+
PA4790	hypothetical protein	1.44	0.0318214			PA4790	+
PA4801	hypothetical protein	1.29	0.0494603			PA4801	-
PA4802	hypothetical protein	-1.39	0.00447834			PA4802	+
PA4803	hypothetical protein	-1.52	3.70656e-05			PA4803	-
PA4805	hypothetical protein	-1.42	0.0157831			PA4805	-
PA4828	hypothetical protein	2.03	1.13387e-12			PA4828	+
lpd3	dihydrolipoamide dehydrogenase	1.39	0.000995892			PA4829	-
PA4836	hypothetical protein	-1.57	0.00339044			PA4836	-
PA4837	hypothetical protein	-1.63	1.61817e-05			PA4837	-
speA	arginine decarboxylase	1.25	0.0283909			PA4839	-
PA4840	translation initiation factor Sui1	1.39	0.00320596			PA4840	-
PA3234	acetate permease	-7.63	3.96948e-142	3.88	0	PA3234	-
fleQ	transcriptional regulator FleQ	-8.05	1.84932e-153	3	0	PA1097	+
prmA	50S ribosomal protein L11 methyltransferase	1.28	0.0174767			PA4850	+
PA4851	hypothetical protein	1.23	0.0375954			PA4851	+
PA4852	hypothetical protein	1.45	4.79783e-06			PA4852	+
fis	Fis family transcriptional regulator	1.42	0.000129525			PA4853	+
PA4858	hypothetical protein	-1.41	0.0216709			PA4858	+
PA4866	hypothetical protein	-1.46	0.037208			PA4866	+
PA4870	hypothetical protein	1.41	0.0351412			PA4870	-
PA4874	hypothetical protein	1.62	1.17117e-05			PA4874	-
PA4879	hypothetical protein	-1.56	8.83483e-08			PA4879	-
PA4880	bacterioferritin	-2.13	8.48646e-20			PA4880	+
PA4882	hypothetical protein	-1.52	0.00936781			PA4882	-
desB	acyl-CoA desaturase	-1.32	0.0439296			PA4888	-
PA4897	hypothetical protein	-1.4	0.0267631			PA4897	+
PA4899	aldehyde dehydrogenase	-1.42	0.0410757			PA4899	-
PA4910	branched-chain amino acid ABC transporter ATP-binding protein	-1.49	0.0112743			PA4910	-
PA4911	branched-chain amino acid ABC transporter permease	-2.07	0.000266224			PA4911	-
PA4913	ABC transporter	-1.75	5.64905e-06			PA4913	-
PA2463	hypothetical protein (predicted hemolysin activation/ secretion protein)	-8.23	2.83336e-48	2.87	0	PA2463	-
PA4677	hypothetical protein (predicted dipeptidase)	-8.96	3.91219e-69	5.99	0	PA4677	-
PA4916	hypothetical protein	-1.25	0.023354			PA4916	-
PA4918	hypothetical protein	-1.29	0.00948555			PA4918	+
azu	azurin	1.19	0.0476182			PA4922	-
PA4923	hypothetical protein	1.36	0.00309243			PA4923	+
PA4222	ABC transporter ATP-binding protein	-9.09	1.52175e-44	7.13	0	PA4222	-
PA3235	hypothetical protein (predicted membrane protein)	-9.18	2.91007e-104	6.49	0	PA3235	-
rpsF	30S ribosomal protein S6	1.47	0.0414079			PA4935	-
Leu_tRNA	Leu tRNA	2.07	1.1583e-11			PA4937.1	+
Leu_tRNA	Leu tRNA	2.62	9.99012e-14			PA4937.2	+
miaA	tRNA delta(2)-isopentenylpyrophosphate transferase	1.22	0.0198473			PA4945	-
mutL	DNA mismatch repair protein	-1.77	1.79289e-13			PA4946	-
amiB	N-acetylmuramoyl-L-alanine amidase	-1.69	1.09834e-10			PA4947	-
PA4948	hypothetical protein	-1.5	8.45931e-06			PA4948	-
orn	oligoribonuclease	1.83	2.20797e-13			PA4951	-
fimX	protein FimX	1.27	0.00556507			PA4959	+
PA4960	phosphoserine phosphatase	-1.46	5.51003e-06			PA4960	-
PA4972	hypothetical protein	1.29	0.0066544			PA4972	+
PA4978	hypothetical protein	-1.67	2.12989e-05			PA4978	-
PA4979	acyl-CoA dehydrogenase	-1.71	6.69792e-07			PA4979	-
PA5138	hypothetical protein (predicted ABC-type amino acid transport/ signal transduction)	-10.23	3.15841e-116	4.2	0	PA5138	-
PA3691	hypothetical protein (no prediction)	-11.66	8.05947e-193	3.31	0	PA3691	+
PA4985	hypothetical protein	1.44	0.00915725			PA4985	-
PA4986	oxidoreductase	-1.5	0.00115008			PA4986	+
waaC	heptosyltransferase I	1.22	0.0433			PA5011	-
ilvE	branched-chain amino acid aminotransferase	1.24	0.010728			PA5013	-
glnE	bifunctional glutamine-synthetase adenylyltransferase/deadenyltransferase	1.21	0.0186175			PA5014	-
PA5017	hypothetical protein	-1.33	0.000926985			PA5017	+
metY	O-acetylhomoserine aminocarboxypropyltransferase	1.24	0.0143856			PA5025	+
aroB	3-dehydroquinate synthase	2.23	0.000238432			PA5038	-
pilQ	type 4 fimbrial biogenesis outer membrane protein PilQ precursor	-1.69	6.40678e-12			PA5040	-
pilP	type 4 fimbrial biogenesis protein PilP	-2.03	1.02086e-19			PA5041	-
pilO	type 4 fimbrial biogenesis protein PilO	-1.81	4.25985e-15			PA5042	-
pilN	type 4 fimbrial biogenesis protein PilN	-1.87	3.21725e-15			PA5043	-
pilM	type 4 fimbrial biogenesis protein PilM	-1.78	1.16374e-10			PA5044	-
PA5046	malic enzyme	1.51	2.07985e-07			PA5046	-
PA5047	hypothetical protein	1.33	0.00100811			PA5047	-
PA5048	nuclease	1.49	4.77119e-05			PA5048	-
rpmE	50S ribosomal protein L31	1.42	0.00295924			PA5049	-
hslV	ATP-dependent protease peptidase subunit	1.58	9.68524e-08			PA5053	+
phaC2	poly(3-hydroxyalkanoic acid) synthase 2	1.33	0.00158526			PA5058	+
hisI	phosphoribosyl-AMP cyclohydrolase	-1.34	0.000541249			PA5066	+
hisE	phosphoribosyl-ATP pyrophosphatase	-1.38	8.24176e-05			PA5067	+
tatA	twin-arginine translocation protein TatA	-1.28	0.00240572			PA5068	+
PA5076	ABC transporter	1.24	0.0112814			PA5076	-
PA5078	glucan biosynthesis protein G	-1.23	0.010401			PA5078	-
PA5082	ABC transporter	-1.89	1.17747e-07			PA5082	-
PA5084	oxidoreductase	-1.71	0.0141246			PA5084	-
PA5086	hypothetical protein	1.46	1.18484e-06			PA5086	-
PA3740	hypothetical protein (no prediction)	-12.15	4.07493e-88	2.72	0	PA3740	+
PA5088	hypothetical protein	1.32	0.000616891			PA5088	-
PA5090	hypothetical protein	-1.4	0.0217489			PA5090	-
PA5097	amino acid permease	-1.64	7.05057e-05			PA5097	-
hutH	histidine ammonia-lyase	-2.07	1.32049e-05			PA5098	-
PA5099	transporter	-1.72	0.000947187			PA5099	-
hutU	urocanate hydratase	-2.82	5.43675e-13			PA5100	-
PA5103	hypothetical protein	1.64	2.67935e-08			PA5103	-
hutC	histidine utilization repressor HutC	-1.67	1.13792e-09			PA5105	-
PA5106	N-formimino-L-glutamate deiminase	-2.33	3.16442e-22			PA5106	+
blc	outer membrane lipoprotein Blc	1.32	0.00288896			PA5107	-
PA5108	hypothetical protein	1.38	0.00044658			PA5108	-
gloA3	lactoylglutathione lyase	-1.24	0.0419954			PA5111	-
estA	esterase	-1.77	1.11345e-12			PA5112	-
thiI	thiamine biosynthesis protein ThiI	1.23	0.0419344			PA5118	-
PA1913	hypothetical protein (no prediction)	-13.51	3.33358e-56	5.01	0	PA1913	-
PA5130	hypothetical protein	1.29	0.0050926			PA5130	-
PA5133	hypothetical protein	1.29	0.00293987			PA5133	+
PA5136	hypothetical protein	1.39	0.00010382			PA5136	+
PA5137	hypothetical protein	-3.31	6.41331e-47			PA5137	-
PA2867	chemotaxis transducer	-14.89	9.5191e-91	9.6	0	PA2867	+
hisF1	imidazole glycerol phosphate synthase subunit HisF	-1.71	2.09914e-06			PA5140	-
hisA	1-(5-phosphoribosyl)-5-[(5-phosphoribosylamino)methylideneamino] imidazole-4-carboxamide isomerase	-1.72	1.06118e-05			PA5141	-
hisH1	imidazole glycerol phosphate synthase subunit HisH	-1.61	1.11362e-08			PA5142	-
hisB	imidazoleglycerol-phosphate dehydratase	-1.5	9.59323e-07			PA5143	-
PA5153	amino acid ABC transporter substrate-binding protein	-1.51	7.1309e-08			PA5153	+
PA5154	ABC transporter permease	-1.35	0.000783615			PA5154	+
PA5155	amino acid (lysine/arginine/ornithine/histidine/octopine) ABC transporter membrane protein	-1.4	0.00119322			PA5155	+
PA5160	drug efflux transporter	-1.26	0.0438891			PA5160	+
rmlB	dTDP-D-glucose 4,6-dehydratase	-2.42	3.66447e-27			PA5161	+
rmlD	dTDP-4-dehydrorhamnose reductase	-2.41	5.49863e-25			PA5162	+
rmlA	glucose-1-phosphate thymidylyltransferase	-2.28	3.34352e-17			PA5163	+
rmlC	dTDP-4-dehydrorhamnose 3,5-epimerase	-2.29	1.29914e-21			PA5164	+
PA0505	hypothetical protein (no prediction)	-16.16	1.64887e-172	2.87	0	PA0505	+
PA5168	dicarboxylate transporter	-4.45	9.94225e-61			PA5168	+
PA5169	C4-dicarboxylate transporter	-4.11	1.04303e-57			PA5169	+
arcB	ornithine carbamoyltransferase	1.22	0.0187104			PA5172	+
PA5174	beta-ketoacyl synthase	1.97	2.17032e-18			PA5174	+
PA5178	LysM domain/BON superfamily protein	1.25	0.0262201			PA5178	-
PA5181.1		1.37	0.0372316			PA5181.1	-
PA5182	hypothetical protein	2.89	7.15454e-07			PA5182	+
PA5195	heat shock protein	-3.06	2.68401e-26			PA5195	-
PA5196	hypothetical protein	-1.96	1.56775e-05			PA5196	+
rimK	ribosomal protein S6 modification protein	-1.98	2.16905e-14			PA5197	+
gcvT1	glycine cleavage system aminomethyltransferase T	1.41	0.00234776			PA5215	-
PA5226	hypothetical protein	1.49	0.00369418			PA5226	+
ppx	exopolyphosphatase	-1.28	0.00391649			PA5241	+
PA3662	hypothetical protein (no prediction)	-23.69	8.54016e-210	2.75	0	PA3662	+
hemB	delta-aminolevulinic acid dehydratase	-1.27	0.0044302			PA5243	-
PA5245	isoprenoid biosynthesis protein with amidotransferase-like domain	-1.23	0.028683			PA5245	+
PA5247	hypothetical protein	-1.49	8.50601e-05			PA5247	-
PA5252	ABC transporter ATP-binding protein	1.22	0.0243484			PA5252	-
dsbH	disulfide bond formation protein	1.41	0.00103408			PA5256	-
argH	argininosuccinate lyase	-1.45	6.03459e-06			PA5263	+
PA5266	hypothetical protein	-1.49	0.00665283			PA5266	-
PA5271	hypothetical protein	1.29	0.02796			PA5271	+
rnk	nucleoside diphosphate kinase regulator	1.44	4.54029e-06			PA5274	-
PA5275	frataxin-like protein	1.26	0.0243068			PA5275	-
PA5283	transcriptional regulator	-1.35	0.00408032			PA5283	+
PA5285	hypothetical protein	1.86	9.10684e-14			PA5285	-
PA5286	hypothetical protein	1.41	8.28965e-05			PA5286	-
PA5291	choline transporter	-1.33	0.0015316			PA5291	+
PA5293	transcriptional regulator	-1.44	0.0106783			PA5293	-
PA5314	hypothetical protein	1.22	0.0465404			PA5314	+
PA5317	dipeptide ABC transporter substrate-binding protein	-1.26	0.0222783			PA5317	+
crc	catabolite repression control protein	1.23	0.0188541			PA5332	+
PA5335	hypothetical protein	1.34	0.0066544			PA5335	+
PA5348	DNA-binding protein	-1.35	0.00119691			PA5348	-
ubiA	4-hydroxybenzoate octaprenyltransferase	1.24	0.0248504			PA5358	+
PA5359	hypothetical protein	1.63	5.76838e-10			PA5359	-
phoB	two-component response regulator PhoB	1.24	0.0327021			PA5360	+
PA5364	two-component response regulator	-4.36	1.63883e-47			PA5364	-
betA	choline dehydrogenase	-2.04	7.46034e-12			PA5372	-
betB	betaine aldehyde dehydrogenase	-1.97	3.83281e-16			PA5373	-
betI	BetI family transcriptional regulator	-2.13	9.35355e-18			PA5374	-
betT1	choline transporter BetT	-2.04	8.50767e-12			PA5375	+
PA5377	ABC transporter permease	-1.26	0.0174099			PA5377	-
PA5378	hypothetical protein	-1.29	0.00653022			PA5378	-
PA5381	hypothetical protein	-1.53	2.70003e-05			PA5381	-
PA5383	hypothetical protein	-1.81	0.00273785			PA5383	+
cls	cardiolipin synthetase	1.49	2.58308e-05			PA5394	-
PA5396	hypothetical protein	-1.73	1.83974e-07			PA5396	+
PA5397	hypothetical protein	-1.86	8.90974e-06			PA5397	+
dgcA	dimethylglycine catabolism protein DgcA	-1.44	0.000947187			PA5398	+
dgcB	dimethylglycine catabolism protein DgcB	-1.53	0.00188823			PA5399	+
PA5404	hypothetical protein	-1.62	9.31768e-05			PA5404	+
gbcA	protein GbcA	-1.52	0.000235817			PA5410	-
glyA1	serine hydroxymethyltransferase	-1.96	0.000113417			PA5415	+
soxB	sarcosine oxidase subunit beta	-1.93	3.43561e-06			PA5416	+
soxD	sarcosine oxidase subunit delta	-1.67	0.00915725			PA5417	+
soxA	sarcosine oxidase subunit alpha	-1.38	0.0167622			PA5418	+
PA5422	hypothetical protein	-1.65	5.46137e-08			PA5422	+
PA5428	transcriptional regulator	1.28	0.0180299			PA5428	-
aspA	aspartate ammonia-lyase	1.51	0.000180427			PA5429	+
PA5442	hypothetical protein	-1.35	0.000343389			PA5442	-
PA5445	coenzyme A transferase	-1.79	0.00126291			PA5445	+
PA4843	two-component response regulator	-40.27	1.6869e-249	4.48	0	PA4843	+
wzt	ABC transporter	1.24	0.0224693			PA5450	-
PA5460	hypothetical protein	2.19	5.47702e-06			PA5460	+
PA5466	hypothetical protein	1.37	0.00410313			PA5466	+
PA5470	peptide chain release factor-like protein	1.63	1.82138e-05			PA5470	-
PA5471	hypothetical protein	1.54	9.69078e-06			PA5471	-
PA5471.1	leader peptide	2.19	0.0115002			PA5471.1	-
PA5472	hypothetical protein	1.24	0.0408238			PA5472	-
PA5477	hypothetical protein	1.24	0.0176316			PA5477	+
PA5482	hypothetical protein	-1.73	0.00480916			PA5482	-
PA5491	cytochrome	1.25	0.0174302			PA5491	-
PA5509	hypothetical protein	1.33	0.000625141			PA5509	+
PA5510	transporter	1.26	0.0103937			PA5510	+
mifS	MifS	-1.36	0.00146437			PA5512	-
PA5522	glutamine synthetase	1.32	0.0279551			PA5522	-
PA5526	hypothetical protein	1.25	0.0049766			PA5526	-
PA5530	MFS dicarboxylate transporter	-1.93	2.55603e-17			PA5530	+
PA5545	hypothetical protein	-1.29	0.00655438			PA5545	-
PA5547	hypothetical protein	-1.33	0.00678046			PA5547	+
atpI	F0F1 ATP synthase subunit I	1.51	3.91752e-07			PA5561	-
gidA	tRNA uridine 5-carboxymethylaminomethyl modification protein GidA	1.31	0.00183381			PA5565	-
